# Supplementary material for: Global mapping of protein phosphorylation events identifies Ste20, Sch9 and the cell-cycle regulatory kinases Cdc28/Pho85 as mediators of fatty acid starvation responses in Saccharomyces cerevisiae
Source: Royal Society of Chemistry journal article supplement (doi:10.1039/c2mb05356j), 2012-01-04

**Supplementary figure legends:**

**Figure S1** Log10 of the summed peak intensity as a function of log2 transformed phosphosite ratios. Ratios after 30 and 60 min of cerulenin treatment are shown in blue and orange, respectively. The broken line represents regulation cut-offs.

**Figure S2** Cerulenin negatively affects cell growth. **(A)** Cells were grown in glucose supplemented media and treated with cerulenin (50  $\mu$ M) from log-phase (arrow). The optical density at 600 nm was subsequently determined by spectrophotometry. **(B)** Cells were synchronized with alpha factor before being released into media containing vehicle or cerulenin (50  $\mu$ M). Cell cycle progression was evaluated by FACS analysis.

**Figure S3** Functional annotation clustering of regulated proteins identifies clusters of transcriptional and translational regulators.

**Figure S4** Heat map of binary matrix of documented transcription factor/target gene relationships. A documented association between a regulated transcription factor (rows) and the regulation of a gene (columns) is indicated in red. Matrix is clustered hierarchically in both rows and columns.

**Figure S5** Hierarchical clustering of z-score standardized time profiles of regulated phospho sites from kinases and kinase regulators. Color key indicates z-score (low values are shown in dark red and high values in white).

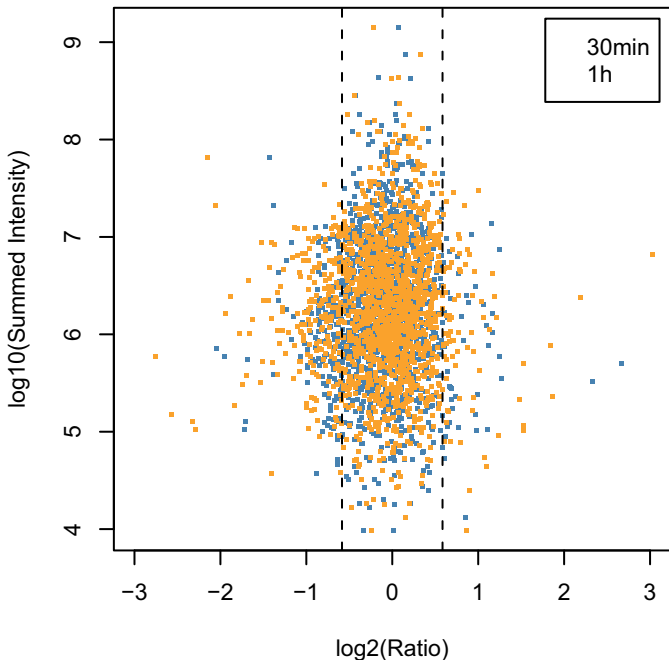

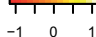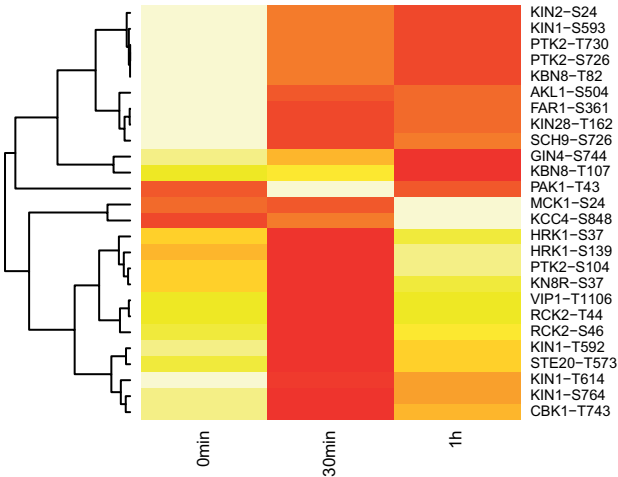

Electronic Supplementary Material (ESI) for Molecular  
BioSystems  
This journal is © The Royal Society of Chemistry 2012

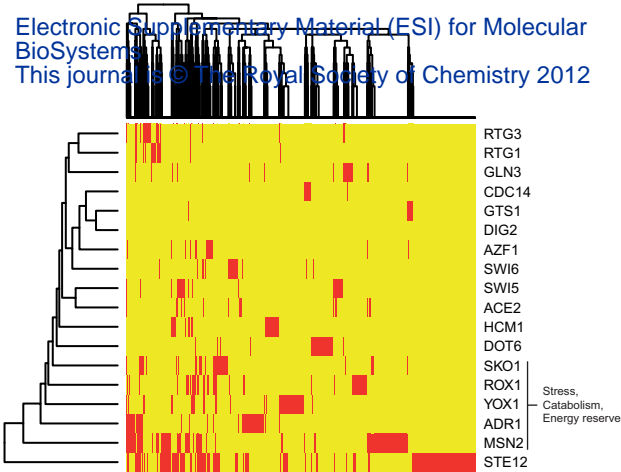

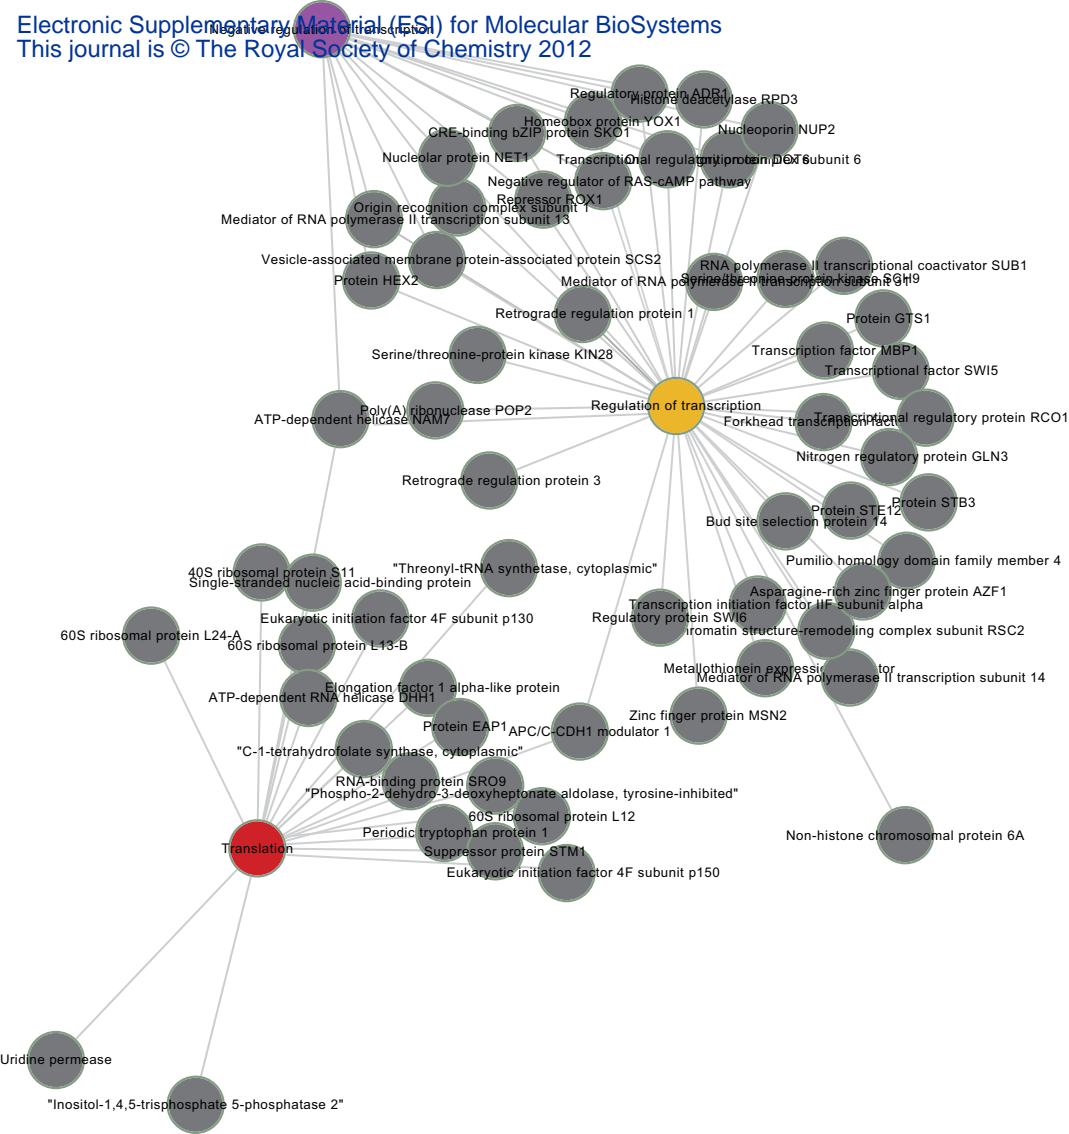

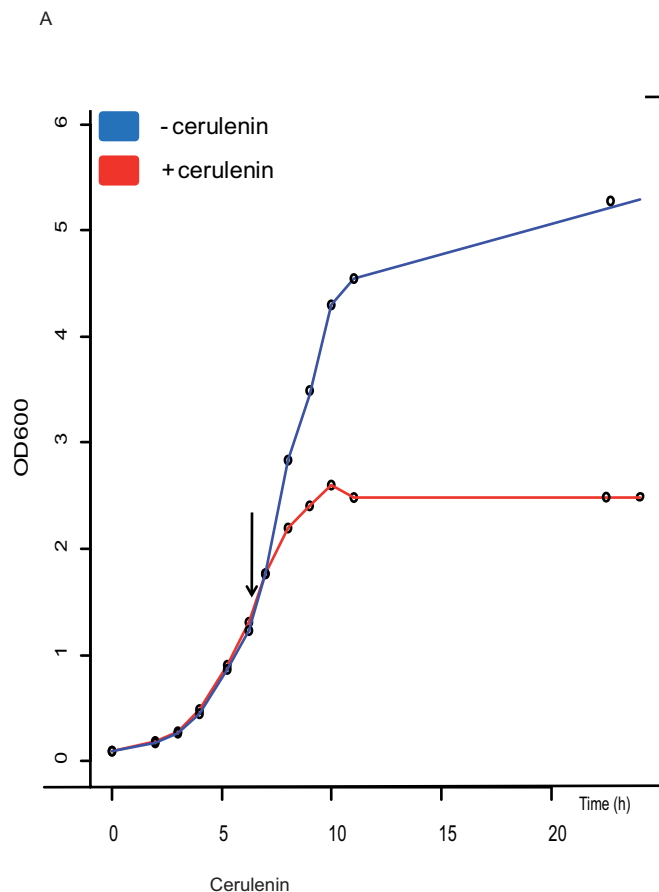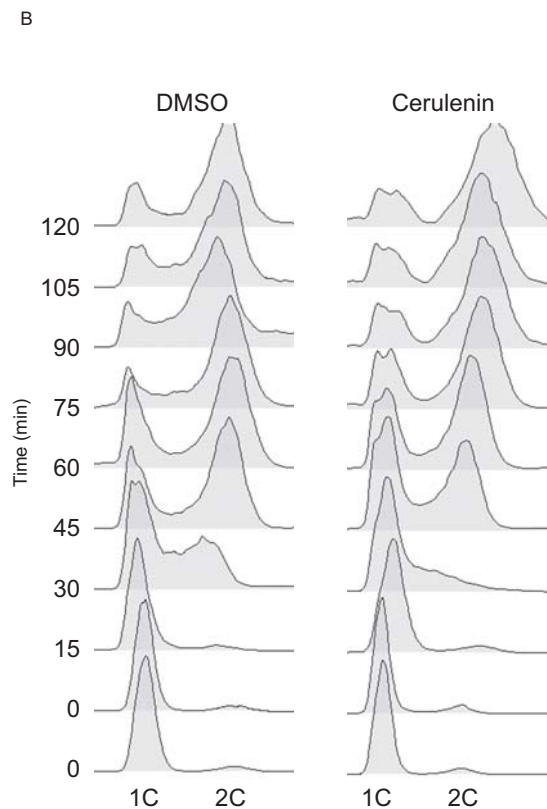

Supplement: c2mb05356j.pdf [file c2mb05356j.pdf]
