# Supplementary material for: Global mapping of protein phosphorylation events identifies Ste20, Sch9 and the cell-cycle regulatory kinases Cdc28/Pho85 as mediators of fatty acid starvation responses in Saccharomyces cerevisiae
Source: Royal Society of Chemistry journal article supplement (doi:10.1039/c2mb05356j), 2012-01-04
Supplement: c2mb05356j.xlsx [file c2mb05356j.xlsx]

## Sheet: Sheet 1
Table S1: Time course profiles of cerulenin-responsive phosphorylations are shown in the table below. Ratios relative to time 0 min are shown in columns "30min" and "1h". Non-regulated phosphosites are indicated by "-" in "Cluster no.", which refers to cluster association of the individual phosphosites.
Uniprot	Gene	Protein	Mascot score	Positions	Amino acid phosphorylated	Sequence window	Localization probability	0min	30min	60min	Cluster no.
P47035	NET1;	Nucleolar protein NET1;	19.21	178	S	PQQQIPSpSSGVLR	0.261674	1	0.30001	166.05	2
P47035	NET1;	Nucleolar protein NET1;	19.21	179	S	QQQIPSSpSGVLRI	0.426029	1	0.30001	166.05	2
P47035	NET1;	Nucleolar protein NET1;	19.21	180	S	QQIPSSSpGVLRIA	0.426029	1	0.30001	166.05	2
Q02100	SKO1;	CRE-binding bZIP protein SKO1;	25.32	212	S	LLNLSKSpGLTPNE	0.66027	1	0.3099	44.703	2
P33332	SEC3;	Exocyst complex component SEC3;	17.92	256	S	NRPGSVSpPIKSPT	0.83675	1	47.862	37.329	4
P39967	UBP9;	Ubiquitin carboxyl-terminal hydrolase 9;	32.06	522	Y	QKMLKSYpHQREML	0.994083	1	2.0859	13.22	2
Q12675	ATC4;	Probable phospholipid-transporting ATPase DNF2;	40.92	1542	S	ERRDQLSpPVTTTN	0.999834	1	0.71464	8.1602	2
Q02100	SKO1;	CRE-binding bZIP protein SKO1;	25.32	215	T	LSKSGLTpPNESNI	0.998727	1	0.86018	4.5561	2
Q04602	YDR19;	Uncharacterized transporter YDR119W;	27.86	190	S	DNQTSSSpKSLHIV	0.62447	1	1.1191	3.6477	2
P53743	ESF2;	Pre-rRNA-processing protein ESF2;	26.76	47	S	KVEDIESpENESDI	1	1	0.72405	3.5805	2
P53743	ESF2;	Pre-rRNA-processing protein ESF2;	26.76	51	S	IESENESpDIEEEQ	1	1	0.72405	3.5805	2
Q03640	TCB3;	Tricalbin-3;	69	1340	S	KSFDRRSpPSNLNS	0.890998	1	0.96981	2.8918	2
P40059	DOT6;	Disrupter of telomere silencing protein 6;	29.41	318	S	GSLANWSpRRSSFN	0.999997	1	1.9775	2.8884	2
P09959	SWI6;	Regulatory protein SWI6;	36.24	178	S	IDAESDSpTPNTAR	0.886792	1	6.3492	2.8757	4
Q03640	TCB3;	Tricalbin-3;	69	1342	S	FDRRSPSpNLNSTS	0.61512	1	1.6061	2.7876	2
P16965	STF2;	ATPase-stabilizing factor 15 kDa protein;	32.96	73	S	RGSNLQSpHEQKFE	0.736677	1	2.8113	2.3615	4
Q07653	HBT1;	Protein HBT1;	44.74	956	S	SQGRKVSpVGSMGS	0.991984	1	0.90525	2.3508	2
P39935	IF4F1;	Eukaryotic initiation factor 4F subunit p150;	36.76	502	S	GRFGNNSpSRGHDF	0.995942	1	1.3476	2.3143	2
P25376	AGP1;	General amino acid permease AGP1;	40.76	6	S	_MSSSKSpLYELKD	1	1	0.89695	2.282	2
P16965	STF2;	ATPase-stabilizing factor 15 kDa protein;	32.96	69	S	KKDRRGSpNLQSHE	0.999821	1	1.7073	2.248	2
Q08412	CUE5;	Ubiquitin-binding protein CUE5;	63.95	367	T	YIDTPDTpETKKKW	0.96113	1	0.88909	2.1852	2
P39935	IF4F1;	Eukaryotic initiation factor 4F subunit p150;	36.76	503	S	RFGNNSSpRGHDFR	0.5	1	1.3285	2.1447	2
P30605	ITR1;	Myo-inositol transporter 1;	54.81	43	T	SKRGKITpLESHEI	0.5	1	0.81313	2.1096	2
A6ZP47;P06634	DED1;DED1	ATP-dependent RNA helicase DED1;ATP-dependent RNA helicase DED1;	30.04	539	S	MMSAPGSpRSNSRR	1	1	1.4127	2.0932	2
A6ZKU1;P32790	SLA1;SLA1	Actin cytoskeleton-regulatory complex protein SLA1;Actin cytoskeleton-regulatory complex protein SLA1;	20.52	449	S	SRSRSKSpNANASW	0.991034	1	1.179	2.0558	2
P48415	SEC16;	COPII coat assembly protein SEC16;	24.14	759	S	IRARGVSpNASVGS	0.998875	1	0.84015	2.0158	2
P30605	ITR1;	Myo-inositol transporter 1;	54.81	46	S	GKITLESpHEIQRA	0.999997	1	0.95638	1.9996	2
Q12427	STB3;	Protein STB3;	18.8	254	S	SFGRRRSpQVVFAD	0.999889	1	0.85231	1.945	2
P06842	STE2;	Pheromone alpha factor receptor;	9.04	313	T	TITSDFTpTSTDRF	0.507701	1	0.97772	1.9311	2
P36169	SKG1;	Suppressor of lethality of KEX2 GAS1 double null mutant protein 1;	29.7	75	S	DEAALASpSELKNP	0.943329	1	1.3151	1.9216	2
P34217	PIN4;	RNA-binding protein PIN4;	49.91	512	T	RQQATLTpPSSRIP	0.99728	1	1.8196	1.9161	4
Q04964	SML1;	Ribonucleotide reductase inhibitor protein SML1;	30.39	87	S	NNNKFGSpGELKSM	1	1	0.94476	1.912	2
Q06146	YL257;	Uncharacterized protein YLR257W;	37.76	68	T	IRDRSYTpSVAELN	0.999596	1	1.1957	1.8912	2
P34217	PIN4;	RNA-binding protein PIN4;	60.26	191	S	EQHRSSSpNLSLDS	0.921875	1	1.3475	1.8646	2
A6ZP47;P06634	DED1;DED1	ATP-dependent RNA helicase DED1;ATP-dependent RNA helicase DED1;	30.04	535	S	LKDAMMSpAPGSRS	0.87037	1	1.3369	1.8606	2
Q05775	EIF3J;	Probable eukaryotic translation initiation factor 3 30 kDa subunit;	69.95	75	T	ALLDIDTpLDEKTR	1	1	1.0388	1.8298	2
P38250	IST2;	Increased sodium tolerance protein 2;	21.31	720	S	STEKRNSpLVKVPT	1	1	1.4775	1.8284	2
P34217	PIN4;	RNA-binding protein PIN4;	53.74	463	T	QFSMQPTpLTSPKM	0.46696	1	1.0115	1.8221	2
Q07653	HBT1;	Protein HBT1;	44.74	962	S	SVGSMGSpGKSKHH	0.999998	1	0.95173	1.8034	2
P53897	YNP7;	Uncharacterized protein YNL157W;	53.89	64	S	KRKYFDSpGDYALQ	1	1	1.0341	1.786	2
P32804	ZRT1;	Zinc-regulated transporter 1;	21.63	179	S	NTAAVSSpENDNEN	0.758363	1	0.89062	1.7376	2
A6ZRZ6;P39013	END3;END3	Actin cytoskeleton-regulatory complex protein END3;Actin cytoskeleton-regulatory complex protein END3;	25.56	276	S	IKQKYASpLTDDQV	0.881132	1	1.3953	1.7365	2
P25567	SRO9;	RNA-binding protein SRO9;	12.8	148	S	KKDGFESpAVGEED	0.990353	1	1.2931	1.7205	2
P35197	GCS1;	ADP-ribosylation factor GTPase-activating protein GCS1;	55.38	260	S	SSAVTKSpFEDVNE	1	1	1.0129	1.7185	2
P25371	ADP1;	Probable ATP-dependent permease;	57.8	659	S	RRIRNISpDLEAGT	0.999996	1	1.7152	1.7133	4
Q06451	TPO3;	Polyamine transporter 3;	47.97	55	S	RTETVKSpLQDMGV	1	1	0.98686	1.713	2
P32607	RTG1;	Retrograde regulation protein 1;	48.46	164	S	PAKRLSSpFEYGGY	0.499991	1	0.90429	1.7124	2
Q03640	TCB3;	Tricalbin-3;	27.06	1404	S	GHSRASSpFARTLA	0.997879	1	1.2221	1.7107	2
P36041	EAP1;	Protein EAP1;	36.44	387	S	MSFFKESpRSSTPN	1	1	1.8928	1.7016	4
P10080	SSBP1;	Single-stranded nucleic acid-binding protein;	19.54	91	T	ALVKFPTpKIDFDN	1	1	1.3775	1.6902	2
P38084	BAP2;	Leu/Val/Ile amino-acid permease;	40.76	3	S	____MLSpSEDFGS	0.990566	1	1.1292	1.6668	2
P40485	SLM1;	Phosphatidylinositol 4,5-bisphosphate-binding protein SLM1;	52.54	145	S	QLQGKNSpLTNTSI	0.99997	1	0.99644	1.6478	2
Q05812	MSC3;	Meiotic sister-chromatid recombination protein 3;	9.07	151	S	AGNNNDSpRANSIT	0.994173	1	1.7714	1.6406	4
Q07653	HBT1;	Protein HBT1;	61.77	1034	S	MGRVRKSpISGGTF	0.999664	1	0.99598	1.6369	2
A6ZUT6;P53335	PXR1;PXR1	Protein PXR1;Protein PXR1;	12.18	232	S	KSSESASpNIPDAV	0.882792	1	2.3744	1.6305	4
A6ZX59;Q06628	ATG13;ATG13	Autophagy-related protein 13;Autophagy-related protein 13;	46.24	379	S	QPFKVGSpIGSQSA	0.999999	1	1.1604	1.6269	2
P40510	SER33;	D-3-phosphoglycerate dehydrogenase 2;	26.05	43	S	TLPRRVSpITKQPK	0.857664	1	2.3727	1.6251	4
Q07653	HBT1;	Protein HBT1;	61.77	1036	S	RVRKSISpGGTFGF	0.999951	1	1.0548	1.6166	2
P33748	MSN2;	Zinc finger protein MSN2;	44.99	633	S	TPSRRSSpVVIEST	0.999417	1	1.5655	1.6112	4
P40510	SER33;	D-3-phosphoglycerate dehydrogenase 2;	26.05	45	T	PRRVSITpKQPKAL	0.999934	1	1.3935	1.5983	2
P25389	KCC4;	Probable serine/threonine-protein kinase KCC4;	26.51	848	S	FQGKNASpGLGLYQ	0.99999	1	1.1746	1.5979	2
Q06146	YL257;	Uncharacterized protein YLR257W;	24.8	197	S	HLAKGESpYQSAEQ	0.99957	1	1.1238	1.5907	2
P38845	YHU6;	Uncharacterized protein YHR146W;	60.93	344	T	VEKRESTpEGVLDG	0.5	1	1.3637	1.5877	2
Q99252	ECM3;	Protein ECM3;	43.68	395	S	TSDATVSpKKDIET	0.997315	1	1.0522	1.5849	2
P25567	SRO9;	RNA-binding protein SRO9;	16.85	69	T	RKKKNRTpPTPKSS	0.986932	1	1.5837	1.5825	4
P34217	PIN4;	RNA-binding protein PIN4;	60.26	194	S	RSSSNLSpLDSLSK	0.999982	1	1.0336	1.5787	2
P42846	KRI1;	Protein KRI1;	11.76	348	T	DMVKKITpDTLLKN	1	1	0.84962	1.569	2
P42846	KRI1;	Protein KRI1;	11.76	350	T	VKKITDTpLLKNDF	1	1	0.84962	1.569	2
Q04500	UTP14;	U3 small nucleolar RNA-associated protein 14;	32.65	488	S	KMLDRNSpDDEEDG	1	1	1.4255	1.5585	2
P20967	ODO1;	2-oxoglutarate dehydrogenase E1 component, mitochondrial;	8.38	988	S	YCGRNPSpGAVAAG	0.964376	1	1.0886	1.5585	2
P46949	FYV8;	Protein FYV8;	49.13	441	S	GSILLTSpDEEEEE	0.937198	1	1.126	1.553	2
Q05812	MSC3;	Meiotic sister-chromatid recombination protein 3;	57.75	130	S	RMNSMTSpGANVRR	0.81943	1	1.4007	1.5505	2
P21304	PWP1;	Periodic tryptophan protein 1;	8.97	327	S	AARSLASpIHSNKN	0.499939	1	1.342	1.5492	2
P21304	PWP1;	Periodic tryptophan protein 1;	8.97	330	S	SLASIHSpNKNVSS	0.499939	1	1.342	1.5492	2
P54115	ALDH6;	Magnesium-activated aldehyde dehydrogenase, cytosolic;	24.51	262	S	SVAVDSSpESNLKK	0.899577	1	1.5926	1.5485	4
P54000	SUB1;	RNA polymerase II transcriptional coactivator SUB1;	70.29	119	S	KMVRLLSpDDEYED	1	1	0.98732	1.5445	2
P39719	FLC2;	Flavin carrier protein 2;	33.17	689	S	FDDETSSpSSFKQN	0.790418	1	1.2343	1.5443	2
P38993	FET3;	Iron transport multicopper oxidase FET3;	38.03	622	S	VNEDRHSpTEKHQF	0.99504	1	1.3571	1.5388	2
P34223	UBX1;	UBX domain-containing protein 1;	26.25	128	S	NNSRFMSpFSDMVR	0.99983	1	1.1328	1.5333	2
Q07950	YEH2;	Sterol esterase 2;	20.42	353	S	WYFGRRSpFIPLMM	1	1	0.99405	1.53	2
Q07950	YEH2;	Sterol esterase 2;	20.42	360	T	FIPLMMTpMRKLMV	1	1	0.99405	1.53	2
P21965	MCK1;	Protein kinase MCK1;	40.75	24	S	IADDVTSpNKSNNT	0.993886	1	0.95332	1.5275	2
Q12680	GLT1;	Glutamate synthase [NADH];	11.38	1902	S	AMQLLESpNTKALL	0.944282	1	1.5225	1.5184	4
Q12191	BUG1;	Binder of USO1 and GRH1 protein 1;	67.7	87	S	NDVDEESpEEKEIE	1	1	2.172	1.5151	4
Q08926	UIP4;	ULP1-interacting protein 4;	57.02	205	S	KGLDNLSpEGNDND	1	1	1.9596	1.5146	4
P53168	DUO1;	DASH complex subunit DUO1;	47.31	11	T	SQLDDSTpIDKLIP	0.999697	1	1.2435	1.5131	2
A6ZKU1;P32790	SLA1;SLA1	Actin cytoskeleton-regulatory complex protein SLA1;Actin cytoskeleton-regulatory complex protein SLA1;	62.27	984	T	ILPVQKTpANGLIS	1	1	1.0826	1.5112	2
P40079	LCP5;	U3 small nucleolar ribonucleoprotein protein LCP5;	26.98	288	S	KERRVTSpFEEDNF	0.91558	1	1.449	1.5104	4
P22943	HSP12;	12 kDa heat shock protein;	20.57	59	S	FQGVHDSpAEKGKD	1	1	0.80881	1.5021	2
P48415	SEC16;	COPII coat assembly protein SEC16;	69.52	1986	S	DVIEDESpDDDNMS	1	1	1.1059	1.4987	-
Q12365	BBP1;	Protein BBP1;	43.36	29	S	LFGTDISpPSMKYK	0.999173	1	1.0299	1.4979	-
P38272	YBY0;	Uncharacterized protein YBR130C;	30.24	343	S	SNNKRRSpFYTASP	0.975601	1	0.98677	1.4971	-
P38250	IST2;	Increased sodium tolerance protein 2;	71.19	767	S	AKSSAESpSNATNN	0.960627	1	1.1616	1.4895	-
P38845	YHU6;	Uncharacterized protein YHR146W;	60.93	343	S	LVEKRESpTEGVLD	0.999867	1	1.3826	1.4862	-
P41895	T2FA;	Transcription initiation factor IIF subunit alpha;	40.61	200	T	VKDGSQTpPTVDSV	0.995682	1	1.2451	1.4794	-
Q08229	YO070;	Uncharacterized protein YOL070C;	40.04	21	S	LNTQRLSpAMIDSL	0.987569	1	1.3396	1.4724	-
P32901	PTR2;	Peptide transporter PTR2;	61.76	45	S	SDDVANSpTERYNL	0.954315	1	0.94029	1.4714	-
P46678	TFC5;	Transcription factor TFIIIB component B;	20.1	134	S	RSSRLASpLSKDNE	0.5	1	1.4468	1.4693	-
P46678	TFC5;	Transcription factor TFIIIB component B;	20.1	136	S	SRLASLSpKDNESR	0.90884	1	1.4468	1.4693	-
Q04773	YMW4;	Uncharacterized protein YMR074C;	56.69	126	S	FSEDLNSpFDKQNA	1	1	1.2152	1.469	-
P33419	NIP29;	Protein NIP29;	38.15	9	S	YSNFGNSpASKKFQ	0.95772	1	1.0497	1.4665	-
Q07653	HBT1;	Protein HBT1;	54.06	561	S	NNNIDMSpPRHEAE	0.999819	1	0.76849	1.4663	-
Q08921	TCO89;	Target of rapamycin complex 1 subunit TCO89;	34.4	56	T	VLTHDGTpLDNDYF	0.985657	1	1.0348	1.4655	-
P38845	YHU6;	Uncharacterized protein YHR146W;	77.27	156	S	NKKSNESpLDDNEE	0.725955	1	1.1847	1.4596	-
Q04233	GIS4;	Protein GIS4;	22.33	608	S	IPTRMESpNVTTAH	0.999783	1	1.0452	1.4527	-
Q04233	GIS4;	Protein GIS4;	22.33	611	T	RMESNVTpTAHRSI	0.89974	1	1.0452	1.4527	-
Q00055	GPD1;	Glycerol-3-phosphate dehydrogenase [NAD+] 1;	30.89	23	S	AGRKRSSpSSVSLK	0.475522	1	1.5431	1.4516	4
Q06604	BSP1;	Protein BSP1;	19.51	320	S	RIPRSESpFIKSML	0.999941	1	0.87176	1.4506	-
P46949	FYV8;	Protein FYV8;	27.69	523	S	KVLEESSpVKDSTD	0.99974	1	1.0928	1.4477	-
P53274	YG36;	Uncharacterized protein YGR126W;	35.2	93	T	SIEKMVTpHNALEG	1	1	1.3671	1.4463	-
Q04214;Q04215	YM13B;YM13A	Transposon Ty1-MR1 Gag-Pol polyprotein;Transposon Ty1-MR1 Gag polyprotein;	30.45	10	S	QQLSQHSpPISHGS	0.98285	1	0.85749	1.4449	-
P47035	NET1;	Nucleolar protein NET1;	47.3	259	S	PPIRISSpGIDAGK	0.999307	1	1.1176	1.4399	-
Q00055	GPD1;	Glycerol-3-phosphate dehydrogenase [NAD+] 1;	30.89	24	S	GRKRSSSpSVSLKA	0.874529	1	1.2879	1.4388	-
P36027	MID2;	Cell wall integrity sensor MID2;	30.15	372	S	EQGNELSpPRNY__	1	1	1.0698	1.4378	-
P37304	PAM1;	Protein PAM1;	52.65	659	S	TQSRLNSpLSNQST	0.999973	1	1.4866	1.4373	-
P53274	YG36;	Uncharacterized protein YGR126W;	9.44	191	S	TTNSQGSpSLEPNK	0.556257	1	1.4236	1.4347	-
P53274	YG36;	Uncharacterized protein YGR126W;	9.44	186	T	TRSKVTTpNSQGSS	0.834007	1	1.4236	1.4347	-
P38085	VAL1;	Valine/tyrosine/tryptophan amino-acid permease;	54.23	4	S	___MDDSpVSFIAK	0.912621	1	1.0125	1.4345	-
P38243	YBS1;	Uncharacterized protein YBR071W;	32.95	75	S	QSKLKRSpSLLLDE	0.5	1	1.5587	1.434	4
P38243	YBS1;	Uncharacterized protein YBR071W;	32.95	76	S	SKLKRSSpLLLDET	0.5	1	1.5587	1.434	4
P19880	YAP1;	AP-1-like transcription factor YAP1;	61.33	528	S	KKAANMSpDDESSL	1	1	1.1615	1.4293	-
P53890	BNI5;	Bud neck protein 5;	46.81	332	S	VSSNSNSpRNGSRK	0.987747	1	1.1735	1.427	-
P32901	PTR2;	Peptide transporter PTR2;	61.76	46	T	DDVANSTpERYNLS	0.5	1	0.75924	1.4248	-
P46949	FYV8;	Protein FYV8;	49.13	440	T	KGSILLTpSDEEEE	0.999999	1	1.1903	1.4246	-
P38284	ICS2;	Increased copper sensitivity protein 2;	22.06	172	S	VNSRKTSpLASSFL	0.99856	1	1.3417	1.4221	-
P53214	MTL1;	Protein MTL1;	22.61	530	S	HRVYDDSpEASIDE	0.99996	1	1.1762	1.4218	-
P53214	MTL1;	Protein MTL1;	22.61	533	S	YDDSEASpIDENYY	1	1	1.1762	1.4218	-
P25087	ERG6;	Sterol 24-C-methyltransferase;	24.49	2	S	_____MSpETELRK	0.962872	1	1.0011	1.4218	-
P06367	RS14A;	40S ribosomal protein S14-A;	44.75	2	S	_____MSpNVVQAR	1	1	1.347	1.4204	-
P36169	SKG1;	Suppressor of lethality of KEX2 GAS1 double null mutant protein 1;	29.7	76	S	EAALASSpELKNPD	0.604609	1	1.3895	1.4173	-
P26754	RFA2;	Replication factor A protein 2;	58.74	122	S	SGKGYGSpQVAQQF	1	1	0.92102	1.4164	-
Q07653	HBT1;	Protein HBT1;	12.45	857	S	QNQEYSSpDDNIDV	0.698145	1	0.96135	1.4161	-
P43597	YFI6;	Uncharacterized protein YFR016C;	59.05	202	S	RRGRNSSpNPADTT	0.981932	1	1.2004	1.4131	-
P53858	BNI4;	Protein BNI4;	31.99	503	S	EVDSIVSpLERTRS	0.999426	1	1.119	1.4125	-
P48813	GNP1;	High-affinity glutamine permease;	44.32	124	S	ELNRKSSpYITVDG	0.999306	1	0.9291	1.4124	-
P48813	GNP1;	High-affinity glutamine permease;	44.32	127	T	RKSSYITpVDGIKQ	1	1	0.9291	1.4124	-
P38845	YHU6;	Uncharacterized protein YHR146W;	77.27	153	S	TKNNKKSpNESLDD	0.711132	1	1.118	1.4111	-
P41895	T2FA;	Transcription initiation factor IIF subunit alpha;	52.78	515	S	RDEEAPSpENEEDE	1	1	1.4991	1.4103	-
P16861	K6PF1;	6-phosphofructokinase subunit alpha;	56.4	189	S	IISRASSpDASDLL	0.988236	1	0.93945	1.4101	-
P07270	PHO4;	Phosphate system positive regulatory protein PHO4;	24.7	204	S	NSTRRVSpPVTAKT	0.999997	1	1.4345	1.4047	-
P34250	YKK5;	Uncharacterized protein YKL105C;	57.16	583	S	LEDETGSpVMDKNN	0.99985	1	1.1706	1.4028	-
P53274	YG36;	Uncharacterized protein YGR126W;	34.67	85	S	TLKRPTSpNSIEKM	0.995912	1	1.3452	1.401	-
P25567	SRO9;	RNA-binding protein SRO9;	16.85	71	T	KKNRTPTpPKSSTA	0.786611	1	1.5671	1.3985	4
P32774	TOA2;	Transcription initiation factor IIA small subunit;	43.41	102	S	QNGSGDSpQSVISV	0.8989	1	1.1855	1.398	-
Q05942	RSA3;	Ribosome assembly protein 3;	55.64	7	S	MSAGDISpAINIKS	1	1	1.1056	1.3977	-
P53725	YN8D;	Uncharacterized protein YNR024W;	80.2	150	S	DKEFTGSpQDDGED	0.994451	1	1.2181	1.3972	-
P27705	MIG1;	Regulatory protein MIG1;	40.21	377	S	TPTTMLSpRSTSGT	0.999999	1	0.8758	1.3891	-
P33748	MSN2;	Zinc finger protein MSN2;	44.99	632	S	MTPSRRSpSVVIES	0.932011	1	1.5453	1.3871	4
Q05812	MSC3;	Meiotic sister-chromatid recombination protein 3;	57.75	127	S	NGSRMNSpMTSGAN	0.988428	1	1.3999	1.387	-
P40052	YEQ9;	Uncharacterized protein YER079W;	89.64	39	S	LDLDQRSpMSPSNI	0.788733	1	1.6054	1.3859	4
Q12476	AIR2;	Protein AIR2;	12	49	S	GRYFGVSpDDDKDA	1	1	1.2303	1.3839	-
P47035	NET1;	Nucleolar protein NET1;	82.49	228	S	PSSKIVSpNNSDDE	0.5	1	1.1145	1.3817	-
Q9P305	IGO2;	Protein IGO2;	62.66	109	S	RRMSSSSpGGDSIS	0.875021	1	1.3204	1.3799	-
Q03373	DIG2;	Down-regulator of invasive growth 2;	23.43	266	S	VTKNSLSpEGASLN	0.88674	1	1.5045	1.3786	4
P15992	HSP26;	Heat shock protein 26;	30.04	42	T	RRQLANTpPAKDST	1	1	1.3821	1.3785	-
P38070	KBN8;	Probable serine/threonine-protein kinase YBR028C;	19.83	167	S	KAEILISpQTATDS	0.767049	1	1.0949	1.3764	-
Q06505	IWS1;	Transcription factor IWS1;	35.59	89	S	HISTDFSpDDDLEK	0.999997	1	1.0227	1.3758	-
P53030	RL1;	60S ribosomal protein L1;	24.2	7	S	MSKITSSpQVREHV	0.999998	1	1.1888	1.3752	-
P41338	THIL;	Acetyl-CoA acetyltransferase;	7.22	21	S	IGSFQGSpLSSKTA	0.790078	1	1.6671	1.375	4
P41338	THIL;	Acetyl-CoA acetyltransferase;	7.22	23	S	SFQGSLSpSKTAVE	0.762719	1	1.6671	1.375	4
P36166	PXL1;	Paxillin-like protein 1;	48.39	43	S	SSQRNASpTGSLQA	0.991098	1	1.2078	1.3743	-
P48813	GNP1;	High-affinity glutamine permease;	31.34	31	Y	LDDVSHYpEMKEIQ	0.5	1	0.87132	1.374	-
P32901	PTR2;	Peptide transporter PTR2;	26.18	9	S	NHPSQGSpDDAQDE	0.999822	1	0.70306	1.3715	-
Q05942	RSA3;	Ribosome assembly protein 3;	55.64	2	S	_____MSpAGDISA	0.999986	1	1.5867	1.3705	4
Q05518;REV_P52593;P33200	PAL1;	Uncharacterized protein YDR348C;	22.74	416	S	GVRRNLSpLSRDNY	0.999998	1	1.2364	1.3703	-
Q08816	YO352;	Uncharacterized protein YOR352W;	19.46	131	S	SHPRRLSpMSQQSK	0.999996	1	1.4458	1.3696	-
P53858	BNI4;	Protein BNI4;	48.51	364	S	KIETSDSpPRKEPM	0.998983	1	1.0538	1.3671	-
P36076	YKI8;	Uncharacterized protein YKL088W;	28.28	42	S	NKERRKSpIHDESN	0.999474	1	0.85259	1.3665	-
Q05812	MSC3;	Meiotic sister-chromatid recombination protein 3;	44.9	157	T	SRANSITpVKTTQV	0.5	1	1.258	1.3662	-
P32356	TREA;	Neutral trehalase;	47.89	60	S	NRTRTMSpVFDNVS	0.665483	1	0.96511	1.3636	-
Q05518;REV_P52593;P33200	PAL1;	Uncharacterized protein YDR348C;	22.74	418	S	RRNLSLSpRDNYDV	0.5	1	1.3079	1.3629	-
Q01448	HPC2;	Histone promoter control protein 2;	37.05	47	S	IKKETGSpDSEDLF	0.977847	1	1.2643	1.3626	-
Q04500	UTP14;	U3 small nucleolar RNA-associated protein 14;	28.3	423	S	RELAAVSpSDEDNE	1	1	1.2062	1.3625	-
Q04500	UTP14;	U3 small nucleolar RNA-associated protein 14;	28.3	424	S	ELAAVSSpDEDNED	1	1	1.2062	1.3625	-
P04911	H2A1;	Histone H2A.1;	34.61	129	S	AKATKASpQEL___	1	1	0.90331	1.362	-
P38701	RS20;	40S ribosomal protein S20;	11.19	39	S	QLENVSSpNIVKNA	0.724311	1	1.4997	1.3614	-
P0C0V8 P05760;Q3E754 P05760	RS21A;RS21B	40S ribosomal protein S21-A;40S ribosomal protein S21-B;	14.43	84	S	LLKNVWSpYSR___	0.99998	1	1.1563	1.3606	-
Q04214;Q04215	YM13B;YM13A	Transposon Ty1-MR1 Gag-Pol polyprotein;Transposon Ty1-MR1 Gag polyprotein;	30.45	7	S	MESQQLSpQHSPIS	0.938347	1	0.91061	1.3606	-
P38250	IST2;	Increased sodium tolerance protein 2;	9.56	704	S	DNDTAGSpAGKKPL	0.976491	1	1.0143	1.3584	-
Q12159	YRA1;	RNA annealing protein YRA1;	65.06	8	S	SANLDKSpLDEIIG	1	1	0.88856	1.357	-
P31688	TPS2;	Trehalose-phosphatase;	23.82	890	S	VMKRSASpYTGAKV	0.998981	1	1.1849	1.3568	-
P38041	BOB1;	Protein BOB1;	24.68	578	S	GHSRDASpLSEMKK	0.997159	1	0.98868	1.3557	-
P34161	YOX1;	Homeobox protein YOX1;	29.1	58	S	SINRPRSpVESALR	0.9999	1	1.541	1.3508	4
P53858	BNI4;	Protein BNI4;	12.94	79	S	ESNARDSpEVQTVN	0.716541	1	1.0874	1.3501	-
P53858	BNI4;	Protein BNI4;	12.94	89	S	TVNMTTSpPSLSAL	0.744168	1	1.0874	1.3501	-
P53858	BNI4;	Protein BNI4;	12.94	91	S	NMTTSPSpLSALAD	0.719839	1	1.0874	1.3501	-
P53858	BNI4;	Protein BNI4;	12.94	87	T	VQTVNMTpTSPSLS	0.756778	1	1.0874	1.3501	-
P53858	BNI4;	Protein BNI4;	12.94	88	T	QTVNMTTpSPSLSA	0.738094	1	1.0874	1.3501	-
P40474	YIM1;	Uncharacterized transporter YIL121W;	55.04	7	S	MAGATSSpIIREND	0.999867	1	0.92475	1.3493	-
P53890	BNI5;	Bud neck protein 5;	46.81	325	S	NPFRVISpVSSNSN	0.995606	1	1.2532	1.3476	-
Q04279	YMX6;	Uncharacterized protein YMR086W;	51.99	46	S	QRPTYRSpASMTNL	0.61672	1	1.0236	1.3472	-
P25567	SRO9;	RNA-binding protein SRO9;	53.72	40	S	APLPTSSpPWKLAP	0.824548	1	1.0597	1.347	-
P24276	SSD1;	Protein SSD1;	59.16	40	S	HVAHRRSpQSELTN	0.988487	1	1.2795	1.3465	-
Q12427	STB3;	Protein STB3;	59.6	340	T	TATSEPTpSRRASR	0.947101	1	0.89435	1.3448	-
P40563	YIS3;	Uncharacterized protein YIR003W;	25.39	85	T	PVRRSTTpEELNNV	0.972368	1	1.15	1.3442	-
Q05812	MSC3;	Meiotic sister-chromatid recombination protein 3;	57.75	129	T	SRMNSMTpSGANVR	0.962834	1	1.5249	1.3437	4
Q06505	IWS1;	Transcription factor IWS1;	23.61	27	T	ASSQKSTpINAENE	0.808858	1	1.0486	1.3424	-
Q3E784	SLO1;	SCOCO-like protein 1;	50.87	2	S	_____MSpAENIST	1	1	1.1572	1.3383	-
Q12156	YD063;	Uncharacterized protein YDR063W;	72.44	137	S	SGLEDDSpDVEELR	1	1	1.0842	1.3382	-
P32804	ZRT1;	Zinc-regulated transporter 1;	21.63	178	S	RNTAAVSpSENDNE	0.953191	1	1.4582	1.3381	-
P33298	PRS6B;	26S protease regulatory subunit 6B homolog;	42.97	8	T	EELGIVTpPVEKAV	1	1	0.96083	1.3377	-
A6ZXG9;P39517	DHH1;DHH1	ATP-dependent RNA helicase DHH1;ATP-dependent RNA helicase DHH1;	26.19	10	T	INNNFNTpNNNSNT	0.827005	1	1.6859	1.3342	4
P38041	BOB1;	Protein BOB1;	17.67	104	S	YGNLNDSpASNIGK	0.860182	1	1.3078	1.3341	-
P05030;P19657	PMA1;PMA2	Plasma membrane ATPase 1;Plasma membrane ATPase 2;	21.57	911	S	AAMQRVSpTQHEKE	0.999967	1	1.4901	1.3338	-
P48415	SEC16;	COPII coat assembly protein SEC16;	69.52	1992	S	SDDDNMSpTDEAKN	0.940126	1	1.0354	1.3327	-
P33302	PDR5;	Pleiotropic ABC efflux transporter of multiple drugs;	19.23	841	S	ERSDLSSpDRKMLQ	0.995208	1	1.1178	1.3323	-
P32793	YSC84;	Protein YSC84;	33.31	274	S	SRRRGMSpLGSRSR	0.999988	1	1.2317	1.3308	-
P36053	ELF1;	Transcription elongation factor 1;	55.93	117	S	NDGEIDSpDEEEVD	1	1	1.2487	1.3274	-
P36053	ELF1;	Transcription elongation factor 1;	55.93	124	S	DEEEVDSpDEERIG	1	1	1.2487	1.3274	-
P17890	RPC7;	DNA-directed RNA polymerase III subunit RPC7;	67.75	189	S	EDVDDASpTGDGAA	0.99653	1	1.1216	1.3271	-
Q12402	YOP1;	Protein YOP1;	19.7	7	S	MSEYASSpIHSQMK	0.508335	1	1.1027	1.327	-
P38915	SPT8;	Transcription factor SPT8;	25.69	385	S	ADDDMDSpLFGDED	1	1	1.2	1.3264	-
P38243	YBS1;	Uncharacterized protein YBR071W;	31.6	207	S	GSSRRTSpLDFF__	0.995942	1	1.4968	1.3247	-
P32774	TOA2;	Transcription initiation factor IIA small subunit;	43.41	95	S	DSHRDASpQNGSGD	0.988243	1	1.3106	1.3243	-
P32521;A6ZVS5 A6ZVS4	PAN1;PAN1	Actin cytoskeleton-regulatory complex protein PAN1;Actin cytoskeleton-regulatory complex protein PAN1;	85.54	1281	S	DEDDGWSpDEDESN	1	1	1.1776	1.3235	-
Q08732	HRK1;	Serine/threonine-protein kinase HRK1;	18.34	139	S	SVNKKLSpMSQLRS	0.532462	1	0.64491	1.3235	2
P47082	AVT1;	Vacuolar amino acid transporter 1;	24.75	64	S	SFKGVNSpLSRFAT	0.983762	1	0.9432	1.3203	-
P05030;P19657	PMA1;PMA2	Plasma membrane ATPase 1;Plasma membrane ATPase 2;	21.57	912	T	AMQRVSTpQHEKET	0.992647	1	1.0438	1.3196	-
P36169	SKG1;	Suppressor of lethality of KEX2 GAS1 double null mutant protein 1;	33.27	215	S	KHNTRQSpSNENLI	0.886792	1	1.3935	1.3154	-
P40343	VPS27;	Vacuolar protein sorting-associated protein 27;	28.07	495	S	SVKANSSpPTTNID	0.807974	1	0.99309	1.3154	-
P53298	OKP1;	Central kinetochore subunit OKP1;	28.57	70	S	SLFYENSpDDAEEG	0.999686	1	1.2881	1.3151	-
Q05812	MSC3;	Meiotic sister-chromatid recombination protein 3;	44.9	155	S	NDSRANSpITVKTT	1	1	1.1979	1.3149	-
P39719	FLC2;	Flavin carrier protein 2;	33.17	691	S	DETSSSSpFKQNSS	0.874654	1	1.1175	1.3149	-
Q04279	YMX6;	Uncharacterized protein YMR086W;	48.88	85	S	RPGKINSpLTQRSS	1	1	1.1273	1.3148	-
P42845	STB1;	Protein STB1;	28.17	419	T	SIDDKLTpD_____	1	1	0.9622	1.3137	-
Q03559	YM8V;	Uncharacterized protein YMR295C;	46.38	11	S	RKKSSISpNTSDHD	0.675321	1	1.2768	1.3136	-
P38070	KBN8;	Probable serine/threonine-protein kinase YBR028C;	19.83	173	S	SQTATDSpKREDED	0.554268	1	0.94605	1.3132	-
P34250	YKK5;	Uncharacterized protein YKL105C;	22.39	45	S	FTSRTTSpIAGINR	0.990765	1	1.1897	1.3109	-
Q06070	YL407;	Uncharacterized protein YLR407W;	65.52	84	T	GGGVNSTpLEMKLT	0.902111	1	1.3613	1.3108	-
P53551	H1;	Histone H1;	17.58	130	S	KKEKEVSpPKPKQA	1	1	1.1145	1.3108	-
Q12427	STB3;	Protein STB3;	59.6	341	S	ATSEPTSpRRASRL	0.989518	1	0.89371	1.3105	-
Q04279	YMX6;	Uncharacterized protein YMR086W;	24.44	63	S	APKRMSSpISSISS	0.3035	1	1.0648	1.3101	-
Q04279	YMX6;	Uncharacterized protein YMR086W;	24.44	69	S	SISSISSpESRRSD	0.356681	1	1.0648	1.3101	-
A6ZMK0;P40210	SIP5;SIP5	Protein SIP5;Protein SIP5;	39.36	48	T	RVRTRRTpTSLVNN	0.600836	1	0.70441	1.3101	-
P33749	MSN4;	Zinc finger protein MSN4;	23.27	362	S	TKPKSISpSSLNRI	0.502952	1	1.2424	1.3098	-
P38070	KBN8;	Probable serine/threonine-protein kinase YBR028C;	19.83	171	T	LISQTATpDSKRED	0.603662	1	1.0188	1.3066	-
O14467 Q7LGJ8 Q86ZS7	MBF1;	Multiprotein-bridging factor 1;	53.64	2	S	_____MSpDWDTNT	1	1	1.0408	1.3007	-
P38070	KBN8;	Probable serine/threonine-protein kinase YBR028C;	19.83	169	T	EILISQTpATDSKR	0.517361	1	0.9952	1.3001	-
P32832	NPL6;	Chromatin structure-remodeling complex protein RSC7;	68.61	4	S	___MSDSpEGGLAS	0.735252	1	0.97343	1.2999	-
P48813	GNP1;	High-affinity glutamine permease;	31.34	29	S	NDLDDVSpHYEMKE	0.999928	1	0.81499	1.2979	-
P22211	NPR1;	Nitrogen permease reactivator protein;	27.86	320	S	RQSSIYSpASRQPT	0.883224	1	1.0282	1.2975	-
P47116	PTK2;	Serine/threonine-protein kinase PTK2/STK2;	32.83	104	S	SVSSHKSpSVALQD	0.869626	1	0.60086	1.2963	3
Q9P305	IGO2;	Protein IGO2;	56.03	63	S	DRQYFDSpGDYALK	1	1	1.2486	1.2949	-
P25558	BUD3;	Bud site selection protein 3;	13.36	1160	S	KVLTENSpNELKDT	0.999923	1	0.96286	1.2949	-
Q07653	HBT1;	Protein HBT1;	49.21	671	S	QDEDPLSpPRQTTN	1	1	0.7342	1.2947	-
P06101	CDC37;	Hsp90 co-chaperone Cdc37;	20.82	484	S	ATMENLSpLNDRDG	0.99957	1	1.2418	1.2927	-
Q12518	ENT1;	Epsin-1;	97.34	366	T	ELLATGTpGIDTFG	0.999972	1	1.2113	1.2927	-
P53551	H1;	Histone H1;	27.79	174	S	TAKKASSpPSSLTY	0.992606	1	1.1964	1.292	-
P48415	SEC16;	COPII coat assembly protein SEC16;	49.8	483	S	KLPWEVSpDGEVSS	1	1	0.97637	1.2903	-
P53719	YN87;	Uncharacterized protein YNR014W;	38.1	197	S	HHHRRNSpVAVKFD	1	1	2.2485	1.2902	4
P53168	DUO1;	DASH complex subunit DUO1;	47.31	2	S	_____MSpEQSQLD	0.793754	1	1.3646	1.2895	-
Q06146	YL257;	Uncharacterized protein YLR257W;	17.94	238	S	EFLRSLSpRSISRG	0.99624	1	1.2582	1.2885	-
P53214	MTL1;	Protein MTL1;	43.53	494	S	GIDDQYSpPTKSAS	0.999611	1	1.491	1.2865	-
A6ZRZ6;P39013	END3;END3	Actin cytoskeleton-regulatory complex protein END3;Actin cytoskeleton-regulatory complex protein END3;	25.56	274	Y	NSIKQKYpASLTDD	0.537322	1	1.218	1.2849	-
O13563	RPN13;	26S proteasome regulatory subunit RPN13;	79.39	133	S	GVLNNSSpESDEEE	0.461139	1	1.109	1.2831	-
Q00816	HEX2;	Protein HEX2;	23.91	769	S	SLRRTLSpLGKSGS	0.999996	1	0.99807	1.2828	-
Q04500	UTP14;	U3 small nucleolar RNA-associated protein 14;	47.03	34	S	NGEFDNSpSDNDKR	1	1	1.1943	1.2827	-
P33399	LAH1;	La protein homolog;	26.99	264	S	ESKEDSSpAIADDD	0.874419	1	1.0613	1.282	-
P32911	SUI1;	Eukaryotic translation initiation factor eIF-1;	38.78	2	S	_____MSpIENLKS	1	1	1.0879	1.2818	-
P25037	UBP1;	Ubiquitin carboxyl-terminal hydrolase 1;	43.24	555	S	EQEFEDSpEEEKEY	1	1	0.87982	1.2803	-
P48415	SEC16;	COPII coat assembly protein SEC16;	59.04	1515	S	GDSLQGSpPQRIHN	0.999999	1	0.91021	1.2787	-
P46949	FYV8;	Protein FYV8;	56.05	281	S	DGEVESSpGALEKK	0.86836	1	1.1585	1.2757	-
P35817	BDF1;	Bromodomain-containing factor 1;	43.41	429	S	NLDDYDSpDEDSRT	0.999184	1	0.96117	1.2752	-
P14742	GFA1;	Glucosamine--fructose-6-phosphate aminotransferase [isomerizing];	28.27	332	S	RREVGASpMTRSIQ	0.5	1	1.0163	1.2742	-
Q04779	RCO1;	Transcriptional regulatory protein RCO1;	7.35	40	S	KRPKRLSpSQNVNY	0.830721	1	1.7059	1.274	4
Q03780	YD239;	Uncharacterized protein YDR239C;	29.2	313	S	SGKSTKSpLQQVSK	0.999994	1	0.816	1.2731	-
Q12513	TMA17;	Translation machinery-associated protein 17;	65.21	68	S	RLEADDSpDDLENI	1	1	1.3356	1.272	-
P38216	YBM6;	Uncharacterized protein YBR016W;	75.86	2	S	_____MSpANDYYG	1	1	1.2764	1.2708	-
Q04279	YMX6;	Uncharacterized protein YMR086W;	24.44	62	S	SAPKRMSpSISSIS	0.87885	1	0.8958	1.2707	-
Q04279	YMX6;	Uncharacterized protein YMR086W;	51.99	48	S	PTYRSASpMTNLRK	0.996714	1	1.0269	1.2697	-
Q12451	OSH2;	Oxysterol-binding protein homolog 2;	68.23	2	S	_____MSpREDLSI	0.999999	1	1.1589	1.2687	-
P06704	CDC31;	Cell division control protein 31;	27.98	130	T	ELGETLTpDEELRA	0.995411	1	1.3747	1.2681	-
P53890	BNI5;	Bud neck protein 5;	55.89	270	S	ENCPNRSpGGSTPL	0.999999	1	1.0117	1.2667	-
P53858	BNI4;	Protein BNI4;	56.23	618	S	DQLVMASpDEEKTE	1	1	1.1514	1.265	-
P26785	RL16B;	60S ribosomal protein L16-B;	22.83	187	S	SAAASESpDVAKQL	0.966422	1	1.076	1.265	-
P43597	YFI6;	Uncharacterized protein YFR016C;	23.01	340	S	KDVESESpLTKNGF	0.973042	1	0.50543	1.2648	3
A6ZQY2;P40021	ZRG8;ZRG8	Zinc-regulated protein 8;Zinc-regulated protein 8;	50.67	613	S	NDLFDLSpDEDDND	1	1	1.126	1.2639	-
P19881	PNPP;	4-nitrophenylphosphatase;	9.29	66	S	IFVTNNSpTKSRLA	0.98309	1	1.4119	1.2636	-
P19881	PNPP;	4-nitrophenylphosphatase;	9.29	67	T	FVTNNSTpKSRLAY	0.983091	1	1.4119	1.2636	-
P33749	MSN4;	Zinc finger protein MSN4;	23.64	523	S	TKQATVSpPNTRRR	0.999929	1	0.90921	1.2635	-
P46949	FYV8;	Protein FYV8;	9.8	109	S	VPKLMASpRESVEL	0.954845	1	1.235	1.2631	-
Q04279	YMX6;	Uncharacterized protein YMR086W;	51.99	50	T	YRSASMTpNLRKPS	0.957151	1	1.0732	1.2613	-
Q3E784	SLO1;	SCOCO-like protein 1;	50.87	8	T	SAENISTpGSPTGK	0.865735	1	1.0673	1.2611	-
P53739	KN8R;	Probable serine/threonine-protein kinase YNR047W;	32.22	37	S	ERTRSISpFSKLLT	0.999389	1	0.59751	1.2593	3
P01120	RAS2;	Ras-like protein 2;	17.34	227	T	NVNSSTTpVVNARN	0.83807	1	1.0821	1.2588	-
P48415	SEC16;	COPII coat assembly protein SEC16;	69.52	1993	T	DDDNMSTpDEAKNR	0.500425	1	1.0124	1.2585	-
Q02775	SLU7;	Pre-mRNA-splicing factor SLU7;	60.64	212	T	DETLWDTpDEEIEL	0.999784	1	1.184	1.2578	-
Q06146	YL257;	Uncharacterized protein YLR257W;	71.33	128	S	INSESFSpSPSLRA	0.882256	1	1.1703	1.257	-
P23301	IF5A2;	Eukaryotic translation initiation factor 5A-2;	62.43	2	S	_____MSpDEEHTF	0.994174	1	1.1142	1.257	-
P32499	NUP2;	Nucleoporin NUP2;	54.49	581	S	EATGNESpQDATKV	0.999826	1	1.101	1.2566	-
Q04461	YM01;	Uncharacterized protein YMR111C;	13.6	42	S	QRTITTSpPTGVSR	0.960557	1	1.3047	1.2559	-
P53388	DIP5;	Dicarboxylic amino acid permease;	43.52	13	S	KMFTSTSpPRNSSS	0.985401	1	0.76863	1.2557	-
P40343	VPS27;	Vacuolar protein sorting-associated protein 27;	63.32	157	S	KLTLSNSpPTAMFD	0.947557	1	0.9634	1.2556	-
Q12191	BUG1;	Binder of USO1 and GRH1 protein 1;	34.73	112	S	DIEEINSpTSSNVG	0.629343	1	1.4604	1.2551	-
Q01560	NOP3;	Nucleolar protein 3;	52.7	224	S	DLARENSpLETTFS	0.999853	1	0.96719	1.2551	-
P16862	K6PF2;	6-phosphofructokinase subunit beta;	41.03	171	S	LSSKVHSpYTDLAY	1	1	1.0014	1.2532	-
P09064	IF2B;	Eukaryotic translation initiation factor 2 subunit beta;	47.9	40	S	NGKENGSpGDDLFA	1	1	0.95006	1.2529	-
Q06440	CORO;	Coronin-like protein;	60.41	520	T	KIETPVTpPTETKK	0.999919	1	0.85082	1.2526	-
P38928	AXL2;	Protein AXL2;	22.28	673	S	RYTGNLSpPVSDIV	0.999201	1	0.75562	1.2516	-
P38928	AXL2;	Protein AXL2;	22.28	676	S	GNLSPVSpDIVRDS	0.999999	1	0.75562	1.2516	-
P38199	YBD2;	KH domain-containing protein YBL032W;	60.33	362	S	ERSDSASpFLEEKE	0.999978	1	0.87524	1.2508	-
P33749	MSN4;	Zinc finger protein MSN4;	39.24	488	S	PAFQRRSpYDISMN	1	1	1.0883	1.2499	-
Q9P305	IGO2;	Protein IGO2;	50.25	6	S	_MSEDLSpPTSSRV	0.999971	1	1.1574	1.2492	-
O14467 Q7LGJ8 Q86ZS7	MBF1;	Multiprotein-bridging factor 1;	53.64	8	T	SDWDTNTpIIGSRA	0.925896	1	1.0739	1.2492	-
P06780	RHO1;	GTP-binding protein RHO1;	32.33	2	S	_____MSpQQVGNS	1	1	0.98227	1.2489	-
Q08245	ZEO1;	Protein ZEO1;	46.17	25	S	LEETKESpLQNKGQ	1	1	1.1744	1.2488	-
Q06205	FKBP4;	FK506-binding protein 4;	17.18	80	S	GLEEDESpESEQEA	0.99953	1	1.1612	1.2485	-
Q06205	FKBP4;	FK506-binding protein 4;	17.18	82	S	EEDESESpEQEADV	0.99953	1	1.1612	1.2485	-
P39523	YM11;	Uncharacterized protein YMR124W;	66.46	766	S	KDGMNASpEEDFSF	0.999999	1	1.263	1.2462	-
P32527	ZUO1;	Zuotin;	20.34	50	S	LRNHTWSpEFERIE	0.999997	1	1.0168	1.245	-
Q12297	TAF3;	Transcription initiation factor TFIID subunit 3;	48.26	345	T	STFQRRTpSLDYGG	0.499991	1	1.2585	1.2449	-
P53832	WSC2;	Cell wall integrity and stress response component 2;	34.17	455	S	NGNQRFSpATSLPD	0.999597	1	1.0757	1.2442	-
P46949	FYV8;	Protein FYV8;	56.05	280	S	DDGEVESpSGALEK	0.998917	1	1.4435	1.2434	-
Q12680	GLT1;	Glutamate synthase [NADH];	9.43	502	S	VPKEFISpQDSLSL	0.501006	1	1.0183	1.2423	-
Q12680	GLT1;	Glutamate synthase [NADH];	9.43	505	S	EFISQDSpLSLKVQ	0.501006	1	1.0183	1.2423	-
Q12680	GLT1;	Glutamate synthase [NADH];	9.43	507	S	ISQDSLSpLKVQSD	0.997988	1	1.0183	1.2423	-
P32521;A6ZVS5 A6ZVS4	PAN1;PAN1	Actin cytoskeleton-regulatory complex protein PAN1;Actin cytoskeleton-regulatory complex protein PAN1;	69.98	1180	S	EDAQNESpDEEETN	1	1	1.0443	1.2417	-
P31688	TPS2;	Trehalose-phosphatase;	23.82	892	T	KRSASYTpGAKV__	0.899983	1	1.1017	1.2416	-
P47035	NET1;	Nucleolar protein NET1;	19.47	362	S	TTPRITSpGMLKIP	0.981996	1	0.67667	1.2415	-
P32607	RTG1;	Retrograde regulation protein 1;	48.46	163	S	PPAKRLSpSFEYGG	0.994451	1	0.91097	1.2413	-
Q9P305	IGO2;	Protein IGO2;	62.66	106	S	IIRRRMSpSSSGGD	0.995157	1	1.2052	1.2402	-
P39523	YM11;	Uncharacterized protein YMR124W;	26.06	293	S	MVSANYSpRSNSLM	0.999818	1	1.4023	1.239	-
P32909	SMY2;	Protein SMY2;	41.2	84	S	PLSRTSSpLIDSIG	0.992673	1	1.037	1.2387	-
Q12161	PSH1;	RING finger protein PSH1;	67.95	143	S	LAVADDSpDDGITR	0.999996	1	1.155	1.2384	-
P34217	PIN4;	RNA-binding protein PIN4;	42.37	640	S	YKSLSHSpGLDDGL	0.825379	1	1.2855	1.2368	-
Q12334	SCM3;	Protein SCM3;	35.01	165	S	RDIIDISpDEEDGD	1	1	1.3917	1.2363	-
Q06146	YL257;	Uncharacterized protein YLR257W;	14.75	242	S	SLSRSISpRGPTKN	0.997691	1	1.2361	1.2359	-
P32521;A6ZVS5 A6ZVS4	PAN1;PAN1	Actin cytoskeleton-regulatory complex protein PAN1;Actin cytoskeleton-regulatory complex protein PAN1;	59.76	1253	S	KDASASSpTSTFDA	0.98669	1	1.4512	1.235	-
P04801	SYTC;	Threonyl-tRNA synthetase, cytoplasmic;	65.73	4	S	___MSASpEAGVTE	0.969329	1	1.1923	1.235	-
P40150;P11484	HSP76;HSP75	Heat shock protein SSB2;Heat shock protein SSB1;	43.57	516	S	AVGRLSSpEEIEKM	0.998788	1	1.1119	1.2334	-
P32900	YHU9;	Uncharacterized protein YHR149C;	21.72	369	S	DIKRMKSpIYQVYL	0.999995	1	0.96544	1.2334	-
P38788	SSZ1;	Ribosome-associated complex subunit SSZ1;	23.91	477	S	AEEDDESpEWSDDE	1	1	1.0817	1.2331	-
P38788	SSZ1;	Ribosome-associated complex subunit SSZ1;	23.91	480	S	DDESEWSpDDEPEV	1	1	1.0817	1.2331	-
Q03661	ESC1;	Silent chromatin protein ESC1;	22.08	1360	T	SRERDLTpFEKSVN	1	1	0.85174	1.2324	-
P35817	BDF1;	Bromodomain-containing factor 1;	76.19	617	T	ASSLSPTpSAGSRK	0.936674	1	1.0473	1.2313	-
P27637	BUD14;	Bud site selection protein 14;	48.88	653	S	DEQRAVSpSASINS	0.983239	1	1.0012	1.2306	-
P27637	BUD14;	Bud site selection protein 14;	48.88	656	S	RAVSSASpINSSLS	0.997295	1	1.0012	1.2306	-
P34167	IF4B;	Eukaryotic translation initiation factor 4B;	32.21	65	S	NSNNTRSpGGFGGS	0.973938	1	1.2005	1.2305	-
P35817	BDF1;	Bromodomain-containing factor 1;	76.19	615	S	RDASSLSpPTSAGS	0.999825	1	0.9618	1.2302	-
P07264	LEUC;	3-isopropylmalate dehydratase;	27.85	488	S	KDQDQSSpPKVEVT	0.971554	1	1.0094	1.2266	-
P46949	FYV8;	Protein FYV8;	16.77	167	T	QISREMTpPEIRQT	1	1	1.3251	1.2262	-
P33749	MSN4;	Zinc finger protein MSN4;	23.27	360	S	GITKPKSpISSSLN	0.998872	1	1.2712	1.2262	-
P47170	IML1;	Vacuolar membrane-associated protein IML1;	72.76	680	S	SLVSVRSpADNQNT	1	1	0.73036	1.224	-
Q04500	UTP14;	U3 small nucleolar RNA-associated protein 14;	47.18	500	S	GRVQTLSpDVENEE	1	1	1.0327	1.2229	-
Q12044	RCN2;	Regulator of calcineurin 2;	42.09	187	S	KLSRSSSpSTSNLS	0.952754	1	1.0285	1.2229	-
P32832	NPL6;	Chromatin structure-remodeling complex protein RSC7;	68.61	2	S	_____MSpDSEGGL	0.95932	1	0.83886	1.2228	-
Q08157	YOL19;	Uncharacterized membrane protein YOL019W;	60.01	224	S	FDIDADSpEANLRG	1	1	0.8741	1.2225	-
P32356	TREA;	Neutral trehalase;	47.89	58	T	KINRTRTpMSVFDN	0.999508	1	0.87595	1.2224	-
P36169	SKG1;	Suppressor of lethality of KEX2 GAS1 double null mutant protein 1;	33.27	216	S	HNTRQSSpNENLIR	0.963743	1	1.2559	1.222	-
Q03954	SPC19;	DASH complex subunit SPC19;	89.16	116	S	DDDALNSpPDMGQE	0.999997	1	1.2005	1.2219	-
Q04067	EIF3G;	Eukaryotic translation initiation factor 3 RNA-binding subunit;	52.66	2	S	_____MSpEVAPEE	1	1	1.0932	1.2218	-
Q08492	BUD21;	Bud site selection protein 21;	59.99	144	S	FDKLDESpDENEEA	1	1	1.1677	1.2213	-
P32628	RAD23;	UV excision repair protein RAD23;	36.63	139	T	RTESASTpPGFVVG	0.957957	1	1.1251	1.221	-
P34730	BMH2;	Protein BMH2;	37.94	2	S	_____MSpQTREDS	0.728487	1	1.1343	1.2201	-
P39523	YM11;	Uncharacterized protein YMR124W;	49.65	681	S	GNGRRLSpNVNISM	1	1	1.5816	1.2186	4
P41818	GLC8;	Protein GLC8;	77.59	184	S	DENDEDSpPEARHK	1	1	0.99205	1.2184	-
Q06440	CORO;	Coronin-like protein;	60.41	522	T	ETPVTPTpETKKDR	0.935694	1	0.89631	1.2182	-
P14742	GFA1;	Glucosamine--fructose-6-phosphate aminotransferase [isomerizing];	28.27	334	T	EVGASMTpRSIQTL	0.999889	1	1.0679	1.2168	-
P34217	PIN4;	RNA-binding protein PIN4;	50.51	655	S	GLNRSLSpGLDLQN	0.977217	1	1.0426	1.2151	-
P32861	UGPA1;	UTP--glucose-1-phosphate uridylyltransferase;	29.58	13	Y	TKTHSTYpAFESNT	0.706853	1	1.0933	1.2144	-
Q02521	SPP2;	Pre-mRNA-splicing factor SPP2;	35.74	117	S	RGMGWESpDSEQDS	0.993363	1	1.2604	1.2127	-
Q12285	MDY2;	Ubiquitin-like protein MDY2;	14.26	2	S	_____MSpTSASGP	0.517066	1	1.0007	1.2121	-
Q08921	TCO89;	Target of rapamycin complex 1 subunit TCO89;	50.41	84	S	FRKRTISpGLNMTA	0.884956	1	1.0188	1.2106	-
Q05518	PAL1;	Uncharacterized protein YDR348C;	48.02	114	S	FLDDVSSpATDFRR	0.922642	1	0.94385	1.2103	-
P14126	RL3;	60S ribosomal protein L3;	31.38	24	S	PRKRAASpIRARVK	1	1	0.94943	1.2099	-
P46678	TFC5;	Transcription factor TFIIIB component B;	40.32	49	S	EIEEDNSpDNDKGV	1	1	1.377	1.2097	-
P09064	IF2B;	Eukaryotic translation initiation factor 2 subunit beta;	65.45	112	S	DNVDAESpKEGTPS	1	1	1.1027	1.2092	-
P43573	BUD27;	Bud site selection protein 27;	83.07	580	S	KILENISpDDDYDD	1	1	1.1053	1.2068	-
P06367;P39516	RS14A;RS14B	40S ribosomal protein S14-A;40S ribosomal protein S14-B;	48.56	11	S	VQARDNSpQVFGVA	1	1	1.0793	1.2067	-
Q06070	YL407;	Uncharacterized protein YLR407W;	65.52	83	S	VGGGVNSpTLEMKL	0.926108	1	1.1064	1.2066	-
Q06263	VTA1;	Vacuolar protein sorting-associated protein VTA1;	49.71	67	S	KEIGGESpEAEDSD	0.999987	1	1.0901	1.2059	-
A7A241;P43587	YPI1;YPI1	Type 1 phosphatases regulator YPI1;Type 1 phosphatases regulator YPI1;	51.19	20	T	QTVGSRTpVSVEEV	0.944965	1	0.94338	1.2059	-
Q12515	YD173;	Uncharacterized protein YDL173W;	21.23	253	T	PKSSRNTpINHNLN	1	1	0.82709	1.2054	-
P34167	IF4B;	Eukaryotic translation initiation factor 4B;	32.21	71	S	SGGFGGSpFGGRSR	1	1	1.1968	1.2038	-
Q99252	ECM3;	Protein ECM3;	41.9	338	S	DLIREYSpNVDQYG	0.939728	1	1.007	1.2036	-
P32494	NGG1;	Chromatin-remodeling complexes subunit NGG1;	13.46	220	T	KMENDPTpVKNPKS	1	1	1.1458	1.2033	-
P33417	IXR1;	Intrastrand cross-link recognition protein;	51.26	6	S	_MNTGISpPKQDDA	1	1	0.91517	1.2025	-
P32521;A6ZVS5 A6ZVS4	PAN1;PAN1	Actin cytoskeleton-regulatory complex protein PAN1;Actin cytoskeleton-regulatory complex protein PAN1;	55.39	570	T	PLTAQKTpGFGNNE	1	1	1.0371	1.2014	-
P38853	KEL1;	Kelch repeat-containing protein 1;	23.66	1022	S	MEHSSLSpQDVLVK	0.846221	1	0.77708	1.2003	-
P11075	SEC7;	Protein transport protein SEC7;	15.57	777	S	SSARQESpRSSLSN	0.965388	1	1.2237	1.2002	-
P04801	SYTC;	Threonyl-tRNA synthetase, cytoplasmic;	65.73	2	S	_____MSpASEAGV	0.994151	1	1.166	1.1983	-
P38249	EIF3A;	Eukaryotic translation initiation factor 3 110 kDa subunit;	27.12	508	S	TASKEVSpEEENTE	0.999703	1	1.1004	1.1976	-
Q04477	SPC24;	Kinetochore protein SPC24;	39.93	130	T	DSEIISTpPNGSKI	0.995161	1	1.0491	1.1967	-
Q00055	GPD1;	Glycerol-3-phosphate dehydrogenase [NAD+] 1;	30.89	22	S	NAGRKRSpSSSVSL	0.959938	1	1.5947	1.196	4
Q04500	UTP14;	U3 small nucleolar RNA-associated protein 14;	47.03	35	S	GEFDNSSpDNDKRH	0.921569	1	1.034	1.196	-
P32566	SMI1;	Cell wall assembly regulator SMI1;	28.27	394	S	GSADVQSpVQDHES	0.959161	1	1.0833	1.1946	-
P50089	YG51;	Uncharacterized protein YGR237C;	21.21	234	S	SKKRSKSpFAGMTD	1	1	1.0363	1.1944	-
P25694	CDC48;	Cell division control protein 48;	53.47	735	T	GEDVEMTpDEGAKA	1	1	1.0234	1.1944	-
P48813	GNP1;	High-affinity glutamine permease;	41.46	45	S	KEKQIGSpIEPENE	1	1	0.79022	1.1936	-
Q06169	PEX30;	Peroxisomal membrane protein PEX30;	24.93	52	S	EDNDNGSpLEKVNV	0.999983	1	0.64822	1.1935	3
P35201	MIF2;	Protein MIF2;	37.01	321	T	DIDKIVTpYDESED	0.531104	1	1.4064	1.1929	-
Q06604	BSP1;	Protein BSP1;	22.59	434	S	AIPQKKSpFLTNNS	0.943926	1	1.15	1.1928	-
P02365	RS6;	40S ribosomal protein S6;	7.01	232	S	IRKRRASpSLKA__	0.5	1	1.2118	1.191	-
P02365	RS6;	40S ribosomal protein S6;	7.01	233	S	RKRRASSpLKA___	0.5	1	1.2118	1.191	-
Q99271	NAH1;	Na(+)/H(+) antiporter;	22.27	767	T	KRILTPTpSLGKIH	0.636853	1	1.0826	1.191	-
Q04279	YMX6;	Uncharacterized protein YMR086W;	33.76	630	S	TMSDSVSpRRASLK	0.996758	1	1.0467	1.1905	-
Q12515	YD173;	Uncharacterized protein YDL173W;	62.9	174	S	NKKKVASpNGGNEE	1	1	0.95309	1.1897	-
P43585	VTC2;	Vacuolar transporter chaperone 2;	68.99	196	S	KFSSIVSpNDIDMN	0.999995	1	1.0983	1.189	-
Q12136	SAS10;	Something about silencing protein 10;	56.69	477	S	DDKDYGSpEDEAVS	1	1	1.0149	1.188	-
Q07418;A6ZXR1	PEX19;PEX19	Peroxisomal membrane protein import receptor PEX19;Peroxisomal membrane protein import receptor PEX19;	60.66	62	S	VQVANESpEEDPEL	1	1	1.1199	1.1869	-
P53297	PBP1;	PAB1-binding protein 1;	64.1	106	S	DSGVSDSpVDDLAK	0.999951	1	1.1369	1.1846	-
P47035	NET1;	Nucleolar protein NET1;	82.49	231	S	KIVSNNSpDDEDED	1	1	1.0057	1.1843	-
P17536	TPM1;	Tropomyosin-1;	41.5	65	S	KLEAGLSpDSKQTE	0.957962	1	0.77268	1.1833	-
P08678	CYAA;	Adenylate cyclase;	47.82	389	T	SLFRLDTpNLEDVT	1	1	1.0113	1.1831	-
P34250	YKK5;	Uncharacterized protein YKL105C;	32.37	137	S	SKSRTTSpLGNSGS	0.957605	1	1.1528	1.1825	-
Q04500	UTP14;	U3 small nucleolar RNA-associated protein 14;	93.05	562	S	DIKLFESpDEEETN	1	1	1.0597	1.1814	-
Q06505	IWS1;	Transcription factor IWS1;	45.56	22	S	PEDGTASpSQKSTI	0.6884	1	0.84855	1.1799	-
P32901	PTR2;	Peptide transporter PTR2;	30.43	594	S	ILEPMESpLRSTTK	0.817328	1	1.411	1.1798	-
P32901	PTR2;	Peptide transporter PTR2;	30.43	598	T	MESLRSTpTKY___	0.817328	1	1.411	1.1798	-
Q08816	YO352;	Uncharacterized protein YOR352W;	54.58	108	S	NVSSPFSpSATKLS	0.960874	1	1.1421	1.1798	-
P53883	NOP13;	Nucleolar protein 13;	13.72	2	S	_____MSpETELSK	0.6635	1	1.3238	1.1797	-
P09064	IF2B;	Eukaryotic translation initiation factor 2 subunit beta;	27.04	92	S	KKTKDSSpVDAFEK	0.999617	1	1.001	1.1796	-
P38213	YBL7;	Uncharacterized protein YBR007C;	49.54	395	S	LESEGSSpPIRSAT	0.996592	1	0.92113	1.1795	-
Q12234	RUD3;	GRIP domain-containing protein RUD3;	38.85	55	S	ADGIVASpPDDEGK	1	1	0.99478	1.177	-
Q06106	MRD1;	Multiple RNA-binding domain-containing protein 1;	59.27	264	S	VNDDANSpDEKENE	1	1	1.1684	1.1763	-
Q06631	BFR2;	Protein BFR2;	78.16	41	S	NEKNGESpDLSDYG	1	1	1.0709	1.1759	-
Q06631	BFR2;	Protein BFR2;	78.16	44	S	NGESDLSpDYGNSN	0.999999	1	1.0709	1.1759	-
P38351	PAF1;	RNA polymerase II-associated protein 1;	74	147	S	RLDDGDSpDDENLD	1	1	1.0847	1.1754	-
P15442	GCN2;	Serine/threonine-protein kinase GCN2;	26.07	569	S	NGGRTLSpQSSIRR	0.9995	1	0.99452	1.1737	-
P15442	GCN2;	Serine/threonine-protein kinase GCN2;	26.07	572	S	RTLSQSSpIRRRSF	0.986377	1	0.99452	1.1737	-
P13586	ATC1;	Calcium-transporting ATPase 1;	12.78	242	T	CIAYMGTpLVKEGH	0.998048	1	1.1513	1.1725	-
P39993	GEA2;	ARF guanine-nucleotide exchange factor 2;	15.4	974	S	QKRLKLSpNLPKPS	1	1	1.2532	1.1723	-
P18494	GLN3;	Nitrogen regulatory protein GLN3;	45.09	395	S	IRSRKKSpLQQNSL	1	1	1.048	1.1721	-
P11433	CDC24;	Cell division control protein 24;	25.74	729	S	SHMKRVSpDVLPKR	1	1	0.80656	1.1714	-
Q03516	RSN1;	Uncharacterized protein RSN1;	38.64	933	S	GEFDTASpKENNPF	0.5	1	0.65586	1.1709	3
Q03516	RSN1;	Uncharacterized protein RSN1;	38.64	931	T	ANGEFDTpASKENN	0.5	1	0.65586	1.1709	3
Q99252	ECM3;	Protein ECM3;	43.68	389	T	NLTRIITpSDATVS	0.999978	1	0.77812	1.1699	-
P15442	GCN2;	Serine/threonine-protein kinase GCN2;	19.05	761	S	TDKESKSpIQNVPR	1	1	0.96004	1.1698	-
P47035	NET1;	Nucleolar protein NET1;	20.58	1158	S	SSDDGKSpFISAKS	0.998619	1	1.1391	1.1689	-
Q12427	STB3;	Protein STB3;	25.06	9	S	ENQKEVSpPPQAIS	0.999995	1	0.93114	1.1685	-
P47127	YJ51;	Uncharacterized protein YJR080C;	10.86	276	S	KNQTLKSpAYGHTV	0.898055	1	1.0283	1.167	-
P32457	CDC3;	Cell division control protein 3;	30.53	9	S	LKEEQVSpIKQDPE	1	1	1.212	1.1658	-
P39938;P39939	RS26A;RS26B	40S ribosomal protein S26-A;40S ribosomal protein S26-B;	7.33	54	S	AAVRDLSpEASVYP	0.9845	1	0.82465	1.1647	-
P36116	VPS51;	Vacuolar protein sorting-associated protein 51;	19.7	88	S	EDLKEGSpEDAEEE	1	1	1.6076	1.1637	4
Q04279	YMX6;	Uncharacterized protein YMR086W;	57.36	450	S	ENDTTSSpPTQDLD	0.990741	1	0.85858	1.1632	-
P26785	RL16B;	60S ribosomal protein L16-B;	22.83	185	S	SASAAASpESDVAK	0.704064	1	1.1538	1.1622	-
Q00816	HEX2;	Protein HEX2;	43.24	254	S	LERGYGSpDDENSK	0.999964	1	1.0539	1.1611	-
P07259	PYR1;	Protein URA1;	7.04	1366	S	KKNILLSpIGSYKE	0.598558	1	1.2195	1.161	-
Q08951	AP3D;	AP-3 complex subunit delta;	64.17	888	S	DEKDNLSpDTEEVI	0.999997	1	1.1988	1.1607	-
P39705	NUP60;	Nucleoporin NUP60;	33.25	473	S	KGFVFNSpVQKKSR	1	1	0.8089	1.1606	-
Q3E7X9 P02380	RS28A;	40S ribosomal protein S28-A;	19.89	5	T	__MDNKTpPVTLAK	0.999605	1	1.0622	1.1598	-
P12709	G6PI;	Glucose-6-phosphate isomerase;	16.74	538	T	NSSTISTpHDASTN	0.546451	1	0.94531	1.1597	-
P13382	DPOA;	DNA polymerase alpha catalytic subunit A;	28.98	214	S	KYLEIESpSPLKLQ	0.499999	1	0.65311	1.159	3
Q00402	NUM1;	Nuclear migration protein NUM1;	22.07	2743	S	RVPQSRSpFGNLR_	1	1	0.99456	1.1589	-
P34216	YBE7;	Uncharacterized protein YBL047C;	27.08	1340	T	NRGVATTpPKSLAV	0.982167	1	0.96713	1.1574	-
P17709	HXKG;	Glucokinase-1;	33.07	2	S	_____MSpFDDLHK	1	1	0.855	1.1563	-
Q06440	CORO;	Coronin-like protein;	60.41	524	T	PVTPTETpKKDRTP	0.817388	1	0.89778	1.154	-
P11075	SEC7;	Protein transport protein SEC7;	36.96	2	S	_____MSpEQNSVV	1	1	0.99006	1.1538	-
P07270	PHO4;	Phosphate system positive regulatory protein PHO4;	32.61	242	S	SLSKRRSpSGALVD	0.727901	1	1.0605	1.1534	-
P32047	MLF3;	Protein MLF3;	9.44	322	S	PKNRSSSpILFQRQ	0.923196	1	1.0454	1.1531	-
P46678	TFC5;	Transcription factor TFIIIB component B;	15.11	164	S	GTARRLSpTISNKL	0.986209	1	1.376	1.1528	-
P39998	EDC3;	Enhancer of mRNA-decapping protein 3;	40.33	257	S	QMIISQSpRSNSTS	0.999999	1	0.98853	1.1528	-
P07264	LEUC;	3-isopropylmalate dehydratase;	38.51	495	S	PKVEVTSpEDEKEL	0.999675	1	1.0273	1.1521	-
P28817	HIBCH;	3-hydroxyisobutyryl-CoA hydrolase, mitochondrial;	7.11	46	T	LFTVQDTpARVITL	0.564157	1	1.3409	1.1516	-
P32909	SMY2;	Protein SMY2;	37.87	68	S	PGSTFRSpNTPLLG	0.551415	1	1.4802	1.1515	-
Q12163	NBP2;	NAP1-binding protein 2;	19.33	235	S	KTKLDISpD_____	0.999999	1	1.2137	1.1514	-
P33748	MSN2;	Zinc finger protein MSN2;	28.28	288	S	LSRRRFSpDVITNQ	0.999672	1	1.168	1.1503	-
P00549	KPYK1;	Pyruvate kinase 1;	70.16	9	S	RLERLTSpLNVVAG	0.998933	1	1.1057	1.1493	-
P16861	K6PF1;	6-phosphofructokinase subunit alpha;	84.8	185	S	SEDEIISpRASSDA	1	1	1.1924	1.1487	-
P32521;A6ZVS5 A6ZVS4	PAN1;PAN1	Actin cytoskeleton-regulatory complex protein PAN1;Actin cytoskeleton-regulatory complex protein PAN1;	12.79	1049	S	QSSRSISpSENSRE	0.839557	1	1.2241	1.1473	-
P16861	K6PF1;	6-phosphofructokinase subunit alpha;	56.4	188	S	EIISRASpSDASDL	0.999799	1	1.0061	1.1473	-
P38041	BOB1;	Protein BOB1;	17.67	106	S	NLNDSASpNIGKVS	0.499993	1	1.3216	1.147	-
Q99385	VCX1;	Vacuolar calcium ion transporter;	49.78	9	T	ATTPLLTpVANSHP	0.916454	1	0.62602	1.1467	3
P25694	CDC48;	Cell division control protein 48;	31.79	521	S	KFGLSPSpKGVLFY	0.5	1	1.1551	1.1448	-
P01120	RAS2;	Ras-like protein 2;	17.34	225	S	GKNVNSSpTTVVNA	0.896791	1	1.1178	1.1444	-
P33313	CNS1;	Hsp70/Hsp90 co-chaperone CNS1;	9.27	229	S	KKIMLESpAMTLRN	0.765058	1	5.04	1.1437	4
P33749	MSN4;	Zinc finger protein MSN4;	23.03	262	Y	GRDARRYpSEVVTS	0.839734	1	0.95793	1.1432	-
Q05518	PAL1;	Uncharacterized protein YDR348C;	48.02	113	S	PFLDDVSpSATDFR	0.557817	1	0.97581	1.1418	-
A6ZQJ1;P10081	IF4A;IF4A	ATP-dependent RNA helicase eIF4A;ATP-dependent RNA helicase eIF4A;	71.7	2	S	_____MSpEGITDI	0.999006	1	0.95353	1.1416	-
P27705	MIG1;	Regulatory protein MIG1;	40.21	371	T	KKSKTSTpPTTMLS	0.996133	1	1.1292	1.1406	-
P54003	SUR7;	Protein SUR7;	27.49	301	S	ERPDDVSpV_____	1	1	0.79505	1.1404	-
P21192	ACE2;	Metallothionein expression activator;	39.12	422	T	YAAGTFTpPRTQLS	0.997212	1	0.99842	1.1393	-
P53278	YG3A;	Uncharacterized protein YGR130C;	51.04	249	S	KVSESTSpIGKGTA	0.935236	1	1.0804	1.1391	-
A6ZKU1;P32790	SLA1;SLA1	Actin cytoskeleton-regulatory complex protein SLA1;Actin cytoskeleton-regulatory complex protein SLA1;	15.07	887	T	MLPMQRTpGGFVVP	0.972295	1	1.1293	1.1386	-
P43597	YFI6;	Uncharacterized protein YFR016C;	59.05	201	S	NRRGRNSpSNPADT	0.5	1	1.0947	1.1378	-
P25037	UBP1;	Ubiquitin carboxyl-terminal hydrolase 1;	33.53	618	S	KRIIEHSpDVENEN	1	1	1.0317	1.1378	-
O13563	RPN13;	26S proteasome regulatory subunit RPN13;	79.39	135	S	LNNSSESpDEEESN	0.997249	1	1.1071	1.1373	-
P38934	BFR1;	Nuclear segregation protein BFR1;	101.02	336	T	DDLVLVTpPKKDDF	1	1	0.85559	1.1371	-
P34217	PIN4;	RNA-binding protein PIN4;	50.51	653	S	EQGLNRSpLSGLDL	0.999973	1	1.1459	1.1369	-
Q03125	NRG1;	Transcriptional regulator NRG1;	58.75	163	S	DPRNTLSpDEEDLE	1	1	1.3465	1.1365	-
A6ZPB3;P12962	CAF20;CAF20	Cap-associated protein CAF20;Cap-associated protein CAF20;	59.07	154	S	AFAALESpEDEDDE	1	1	1.0487	1.1365	-
P38272	YBY0;	Uncharacterized protein YBR130C;	28.96	361	S	SIPKSASpPVLPGV	0.995239	1	0.88812	1.1362	-
P04801	SYTC;	Threonyl-tRNA synthetase, cytoplasmic;	18.97	195	S	MKDISESpPERTVS	0.999908	1	0.62887	1.1348	3
Q06407	RGA2;	Rho-type GTPase-activating protein 2;	14.5	524	S	HKKAQSSpLGSISK	0.818502	1	0.74313	1.1343	-
Q08548	ALE1;	Lysophospholipid acyltransferase;	35.95	605	S	ERVRKMSpFSGYSP	0.985135	1	1.0625	1.1341	-
P20967	ODO1;	2-oxoglutarate dehydrogenase E1 component, mitochondrial;	8.38	995	S	GAVAAGSpKSLHLA	0.933409	1	1.0832	1.1339	-
P39969	BOI2;	Protein BOI2;	19.91	683	S	PSEKNSSpPIVDKK	0.999479	1	0.92504	1.1338	-
P13574	STE12;	Protein STE12;	7.53	451	S	SNNFQQSpYPNGMV	0.599368	1	1.1861	1.1335	-
P40052	YEQ9;	Uncharacterized protein YER079W;	89.64	41	S	LDQRSMSpPSNIAS	0.912727	1	1.4933	1.1334	-
Q08732	HRK1;	Serine/threonine-protein kinase HRK1;	46.88	37	S	LIRSSKSpFLNFIG	1	1	0.65844	1.1329	3
P53388	DIP5;	Dicarboxylic amino acid permease;	43.52	12	T	KKMFTSTpSPRNSS	0.928506	1	0.71568	1.1315	-
Q04279	YMX6;	Uncharacterized protein YMR086W;	28.18	578	T	PVTKVVTpPIKSAL	1	1	0.89942	1.1313	-
P34240	ZRT3;	Zinc-regulated transporter 3;	65.94	178	S	QMKKKMSpLIDLLT	1	1	0.84	1.1313	-
P34223	UBX1;	UBX domain-containing protein 1;	41.49	210	S	RGFRLGSpTIDAAD	0.5	1	1.0208	1.1304	-
P34223	UBX1;	UBX domain-containing protein 1;	41.49	211	T	GFRLGSTpIDAADE	0.5	1	1.0208	1.1304	-
P38250	IST2;	Increased sodium tolerance protein 2;	61.65	793	S	DAVDALSpRKIDQI	1	1	1.036	1.1287	-
Q06505	IWS1;	Transcription factor IWS1;	45.56	20	T	ATPEDGTpASSQKS	0.349104	1	0.85446	1.1283	-
Q04233	GIS4;	Protein GIS4;	28.44	708	S	LKKIKSSpINAMSA	0.815921	1	0.99151	1.1273	-
P32521;A6ZVS5 A6ZVS4	PAN1;PAN1	Actin cytoskeleton-regulatory complex protein PAN1;Actin cytoskeleton-regulatory complex protein PAN1;	36.43	1003	S	VDDRSSSpPSYSQF	0.963652	1	1.1326	1.1271	-
P40059	DOT6;	Disrupter of telomere silencing protein 6;	45.89	251	T	SNSHSFTpNSLNQD	0.76211	1	1.0642	1.1248	-
P53550	DCP2;	mRNA-decapping enzyme subunit 2;	16.35	682	S	PTESNKSpINETVG	0.989302	1	0.90801	1.1245	-
P35817	BDF1;	Bromodomain-containing factor 1;	55.09	269	S	IAKGRRSpSAQEDA	0.938214	1	0.99304	1.1241	-
P25441	RPC4;	DNA-directed RNA polymerase III subunit RPC4;	37.1	137	S	IDNGAESpSENEAE	0.999958	1	0.9665	1.1231	-
P25441	RPC4;	DNA-directed RNA polymerase III subunit RPC4;	37.1	138	S	DNGAESSpENEAED	0.999988	1	0.9665	1.1231	-
Q05785	ENT2;	Epsin-2;	46.46	450	T	TLLATGTpGIDTFG	0.980213	1	0.86742	1.1226	-
Q00955	ACAC;	Acetyl-CoA carboxylase;	45.03	9	S	EESLFESpSPQKME	0.885432	1	0.78208	1.1225	-
Q04279	YMX6;	Uncharacterized protein YMR086W;	42.18	302	S	LDNSNSSpESETVV	0.755198	1	1.0306	1.1224	-
Q12297	TAF3;	Transcription initiation factor TFIID subunit 3;	48.26	346	S	TFQRRTSpLDYGGY	0.99843	1	1.1336	1.1223	-
P42845	STB1;	Protein STB1;	45.51	89	S	NKMTVISpPVKFVE	1	1	0.96972	1.1216	-
P14737	RAD9;	DNA repair protein RAD9;	7.76	898	S	SISLDLSpEWAKRA	0.571534	1	1.3082	1.1214	-
P25441	RPC4;	DNA-directed RNA polymerase III subunit RPC4;	12.16	224	S	EIQEALSpEKPTRE	0.796237	1	0.68907	1.1213	-
P25441	RPC4;	DNA-directed RNA polymerase III subunit RPC4;	12.16	228	T	ALSEKPTpREPTPS	0.892187	1	0.68907	1.1213	-
P32900	YHU9;	Uncharacterized protein YHR149C;	7.64	137	S	HLYSSDSpQQDFME	0.537072	1	0.98614	1.1212	-
P47818	CCC1;	Protein CCC1;	25.94	31	S	ELGGSESpTPLLRG	0.772111	1	0.92514	1.1205	-
P05319	RLA2;	60S acidic ribosomal protein P2-alpha;	79.71	49	S	SALEGKSpVDELIT	1	1	1.1969	1.1204	-
Q03833	GIS1;	Transcriptional activator/repressor GIS1;	38.78	425	S	TISRISSpPLLSRM	0.990398	1	1.0624	1.1204	-
P35201	MIF2;	Protein MIF2;	37.01	322	Y	IDKIVTYpDESEDE	0.868459	1	1.2569	1.1203	-
Q08229	YO070;	Uncharacterized protein YOL070C;	22.11	194	S	SLKLLSSpPLRQEK	0.997891	1	1.0749	1.1199	-
P39719	FLC2;	Flavin carrier protein 2;	33.17	688	S	LFDDETSpSSSFKQ	0.740248	1	1.0118	1.1195	-
P43573	BUD27;	Bud site selection protein 27;	83.07	584	Y	NISDDDYpDDDDDG	0.768751	1	1.0231	1.1194	-
P32909	SMY2;	Protein SMY2;	28.59	96	S	GIQRAASpPFSSMK	0.999998	1	1.0879	1.1178	-
P17536	TPM1;	Tropomyosin-1;	41.5	67	S	EAGLSDSpKQTEQD	0.973828	1	1.0579	1.1177	-
P32900	YHU9;	Uncharacterized protein YHR149C;	30.04	169	T	YNVRSATpPPAIGR	0.950235	1	0.94282	1.1172	-
Q08229	YO070;	Uncharacterized protein YOL070C;	22.11	193	S	GSLKLLSpSPLRQE	0.5	1	1.0334	1.1171	-
A6ZQY2;P40021	ZRG8;ZRG8	Zinc-regulated protein 8;Zinc-regulated protein 8;	28.78	403	S	YSLNNNSpDEYSVN	0.975652	1	1.3108	1.117	-
P27637	BUD14;	Bud site selection protein 14;	13.59	179	S	QEIETDSpVDSADK	0.904716	1	0.99343	1.1166	-
P27637	BUD14;	Bud site selection protein 14;	13.59	182	S	ETDSVDSpADKDEV	0.998277	1	0.99343	1.1166	-
P25389	KCC4;	Probable serine/threonine-protein kinase KCC4;	41.55	894	S	KIAASLSpDDDLKE	0.999927	1	0.81406	1.1164	-
Q04500	UTP14;	U3 small nucleolar RNA-associated protein 14;	70.67	151	S	NDDEDASpPQLKLQ	1	1	1.0754	1.1158	-
P32485	HOG1;	Mitogen-activated protein kinase HOG1;	37.52	176	Y	DPQMTGYpVSTRYY	0.998598	1	0.85287	1.1155	-
Q04279	YMX6;	Uncharacterized protein YMR086W;	35.11	228	S	LNARNGSpLLRKKV	1	1	1.024	1.1153	-
P46949	FYV8;	Protein FYV8;	66.05	163	S	NLIEQISpREMTPE	1	1	1.3438	1.1149	-
Q12514	NOT5;	General negative regulator of transcription subunit 5;	30.85	256	S	APQRDVSpISDRAT	0.995942	1	1.216	1.1139	-
Q02969	PEX25;	Peroxisomal membrane protein PEX25;	27.03	304	S	KDDGSQSpPIRKQL	0.992072	1	1.0381	1.1139	-
P53438	SOK2;	Protein SOK2;	74.78	771	S	DGAGDVSpNEEIAA	1	1	1.2062	1.1138	-
Q06146	YL257;	Uncharacterized protein YLR257W;	37.76	66	S	DDIRDRSpYTSVAE	0.999614	1	0.98664	1.1135	-
P39078	TCPD;	T-complex protein 1 subunit delta;	8.11	422	S	APEIEISpRRLSKE	1	1	1.8073	1.1132	4
P34078	LTV1;	Protein LTV1;	22.37	281	S	RFQKDNSpILEKHN	1	1	0.88406	1.1128	-
A6ZKU1;P32790	SLA1;SLA1	Actin cytoskeleton-regulatory complex protein SLA1;Actin cytoskeleton-regulatory complex protein SLA1;	28.26	904	T	GMQSQVTpGGILPV	0.965496	1	0.97679	1.1125	-
P47035	NET1;	Nucleolar protein NET1;	42.38	497	S	QPPRKSSpLETIVE	0.993372	1	0.9038	1.1117	-
Q08561	IES4;	Ino eighty subunit 4;	43.24	25	S	PKIEDTSpPPSANS	0.899551	1	1.146	1.1114	-
P35732	YKF4;	Uncharacterized protein YKL054C;	32.3	260	S	AVKKTESpPLENVA	0.988493	1	1.0779	1.1112	-
P38904	SPP41;	Protein SPP41;	47.9	1014	S	LTKRAESpVEPVEN	1	1	1.4919	1.1103	-
P50111	ZDS1;	Protein ZDS1;	28.85	444	S	YNHYRQSpSGEWEQ	0.5	1	0.8707	1.1103	-
P50111	ZDS1;	Protein ZDS1;	28.85	445	S	NHYRQSSpGEWEQE	0.5	1	0.8707	1.1103	-
P38174	AMPM2;	Methionine aminopeptidase 2;	39.69	35	S	QAKADESpDPVESK	0.999999	1	0.8875	1.1094	-
P32465	HXT1;	Low-affinity glucose transporter HXT1;	16.91	31	T	RSKAMNTpPEGKNE	1	1	0.8363	1.1092	-
P17065	SEC2;	Rab guanine nucleotide exchange factor SEC2;	17.49	11	S	EEAKRVSpIQVTSL	0.841802	1	1.0861	1.109	-
P17065	SEC2;	Rab guanine nucleotide exchange factor SEC2;	17.49	18	S	IQVTSLSpTQLIES	0.616005	1	1.0861	1.109	-
P17065	SEC2;	Rab guanine nucleotide exchange factor SEC2;	17.49	24	S	STQLIESpVDKQSH	0.882264	1	1.0861	1.109	-
P34217	PIN4;	RNA-binding protein PIN4;	53.74	465	T	SMQPTLTpSPKMNI	0.828398	1	1.1905	1.1089	-
P47074	MAD3;	Spindle assembly checkpoint component MAD3;	34.62	499	S	KNSEIISpDDDKSS	0.999999	1	1.287	1.1075	-
P14682	UBC3;	Ubiquitin-conjugating enzyme E2-34 kDa;	62.61	282	S	HKAEDESpEDVEDV	1	1	0.9773	1.1075	-
P35817	BDF1;	Bromodomain-containing factor 1;	55.09	270	S	AKGRRSSpAQEDAP	0.992478	1	0.94142	1.1071	-
P11075	SEC7;	Protein transport protein SEC7;	36.96	6	S	_MSEQNSpVVNAEK	0.996268	1	0.87406	1.1062	-
P32499	NUP2;	Nucleoporin NUP2;	22.25	284	S	NSKAEASpFTFGTK	0.900634	1	0.99484	1.1049	-
P38041	BOB1;	Protein BOB1;	34.15	540	S	NRISMLSpPVKSSF	1	1	0.95352	1.1045	-
Q03497	STE20;	Serine/threonine-protein kinase STE20;	32.19	170	T	LSLTDSTpETIENN	0.625285	1	1.0595	1.1042	-
Q03497	STE20;	Serine/threonine-protein kinase STE20;	32.19	172	T	LTDSTETpIENNAT	0.999325	1	1.0595	1.1042	-
Q04322	YM52;	TBC domain-containing protein YMR192W;	8.41	530	S	RGDTLLSpNECMDK	0.5	1	0.90787	1.1042	-
Q04322	YM52;	TBC domain-containing protein YMR192W;	8.41	527	T	DGTRGDTpLLSNEC	0.5	1	0.90787	1.1042	-
P32499	NUP2;	Nucleoporin NUP2;	41.64	17	S	QRETYDSpNESDDD	0.93218	1	1.043	1.104	-
P38845	YHU6;	Uncharacterized protein YHR146W;	19.71	332	S	VEPVEGSpLQSKLV	1	1	1.0573	1.1039	-
P38845	YHU6;	Uncharacterized protein YHR146W;	19.71	335	S	VEGSLQSpKLVEKR	1	1	1.0573	1.1039	-
P25441	RPC4;	DNA-directed RNA polymerase III subunit RPC4;	20.37	178	S	DEDDGESpEKSSDV	1	1	0.98169	1.1024	-
Q12176	MAK21;	Ribosome biogenesis protein MAK21;	30.5	73	S	KLIQGLSpDDDDAK	1	1	0.88962	1.1023	-
Q04213	IOC4;	ISWI one complex protein 4;	40.54	242	S	QQAIDASpEEEEEE	1	1	1.3559	1.1018	-
P38227	YBP3;	Uncharacterized transporter YBR043C;	35.07	425	T	SLRKLQTpNLEEQV	1	1	1.0382	1.1017	-
P00549	KPYK1;	Pyruvate kinase 1;	70.16	8	T	SRLERLTpSLNVVA	0.930693	1	1.0449	1.1008	-
P38845	YHU6;	Uncharacterized protein YHR146W;	11.98	390	S	TAEGRKSpPAVSEE	1	1	1.5197	1.1005	4
P38845	YHU6;	Uncharacterized protein YHR146W;	11.98	394	S	RKSPAVSpEEKEKK	1	1	1.5197	1.1005	4
Q06505	IWS1;	Transcription factor IWS1;	45.56	23	S	EDGTASSpQKSTIN	0.971255	1	0.93487	1.0991	-
P48234	NOL10;	Ribosome biogenesis protein ENP2;	16.63	259	T	YIYDLRTpSEPSII	0.614967	1	0.87674	1.0991	-
P53832	WSC2;	Cell wall integrity and stress response component 2;	20.39	458	S	QRFSATSpLPDMME	0.959629	1	0.83783	1.0988	-
Q08921	TCO89;	Target of rapamycin complex 1 subunit TCO89;	34.4	52	T	GLRRVLTpHDGTLD	0.89768	1	0.97261	1.0985	-
P36041	EAP1;	Protein EAP1;	63.56	391	T	KESRSSTpPNAESQ	0.823087	1	1.26	1.098	-
P53853	VPS75;	Vacuolar protein sorting-associated protein 75;	26.81	3	S	____MMSpDQENEN	1	1	0.98152	1.0975	-
P38968	SEC31;	Protein transport protein SEC31;	84.6	473	S	AFDNDESpDAQDDA	1	1	1.021	1.0973	-
P32521;A6ZVS5 A6ZVS4	PAN1;PAN1	Actin cytoskeleton-regulatory complex protein PAN1;Actin cytoskeleton-regulatory complex protein PAN1;	48.49	748	S	EQSSFSSpPSAKSV	0.998814	1	0.85041	1.0971	-
Q12124	MED2;	Mediator of RNA polymerase II transcription subunit 2;	47.88	6	S	_MVVQNSpPVSSVH	0.997712	1	1.1296	1.097	-
P25623	SYP1;	Suppressor of yeast profilin deletion;	43.13	347	S	LRSKVGSpIFGRNK	1	1	1.1305	1.0968	-
Q04739	GAL83;	Glucose repression protein GAL83;	32.96	12	S	PENKDASpMLDVSD	0.999999	1	1.1832	1.0967	-
P54867	SLG1;	Protein SLG1;	27.87	353	S	DDSRRISpNGTFIN	1	1	1.2872	1.0961	-
P54867	SLG1;	Protein SLG1;	27.87	356	T	RRISNGTpFINGGP	1	1	1.2872	1.0961	-
Q99385	VCX1;	Vacuolar calcium ion transporter;	49.78	13	S	LLTVANSpHPARNP	0.999998	1	0.71387	1.0948	-
P43597	YFI6;	Uncharacterized protein YFR016C;	57.26	975	S	IDDINISpDEFQRT	1	1	1.0683	1.0946	-
P33399	LAH1;	La protein homolog;	75.44	19	S	PQSRRNSpFAVIEF	1	1	0.91943	1.0944	-
P42845	STB1;	Protein STB1;	20.62	218	T	AVRMPTTpPRSYHY	0.999747	1	0.99716	1.094	-
P53739	KN8R;	Probable serine/threonine-protein kinase YNR047W;	39.6	303	S	KNLSNLSpLNEIKE	1	1	0.96449	1.0937	-
P36006;A6ZZJ1	MYO3;MYO3	Myosin-3;Myosin-3;	9.8	1185	T	YKDTRNTpVPVAAT	0.805524	1	0.75268	1.0937	-
P36006;A6ZZJ1	MYO3;MYO3	Myosin-3;Myosin-3;	9.8	1198	T	GAVNDVTpNQKSSQ	0.924342	1	0.75268	1.0937	-
Q03063	DIG1;	Down-regulator of invasive growth 1;	34.49	330	S	ERDALLSpANTKAR	0.999998	1	1.0839	1.093	-
P36166	PXL1;	Paxillin-like protein 1;	23.65	193	S	EREQDLSpPIERSF	1	1	0.95421	1.0924	-
P43597	YFI6;	Uncharacterized protein YFR016C;	48.02	180	S	GIEVGNSpPITRRK	1	1	0.92482	1.0922	-
P33749	MSN4;	Zinc finger protein MSN4;	42.11	558	S	QPRKRKSpITTIDP	0.999924	1	0.94755	1.0921	-
Q06108	YP115;	Uncharaterized PH domain-containing protein YPR115W;	58.58	866	S	GMLYNRSpADNLMA	1	1	1.0487	1.0915	-
Q05518	PAL1;	Uncharacterized protein YDR348C;	67.13	47	T	AKNQSRTpNSFDMP	0.938298	1	1.1346	1.0908	-
P21304	PWP1;	Periodic tryptophan protein 1;	77.66	52	S	EEAEGESpGVEDDA	1	1	1.135	1.0889	-
P0C2J1;Q6Q5H1	YP14B;YP14A	Transposon Ty1-PR3 Gag-Pol polyprotein;Transposon Ty1-PR3 Gag polyprotein;	38.51	10	S	QQLSNYSpPISHGS	0.872959	1	0.61849	1.0889	3
Q00955	ACAC;	Acetyl-CoA carboxylase;	45.03	10	S	ESLFESSpPQKMEY	0.98177	1	0.94226	1.0887	-
P09938	RIR2;	Ribonucleoside-diphosphate reductase small chain 1;	63.49	15	S	AAADALSpDLEIKD	1	1	1.0501	1.0876	-
P50109	PSP2;	Protein PSP2;	26.73	238	S	KTQRSKSpNPFGSA	0.999998	1	0.89591	1.0868	-
Q12044	RCN2;	Regulator of calcineurin 2;	63.15	160	S	DKSSLESpPTMLKL	0.991316	1	0.93848	1.0867	-
P54000	SUB1;	RNA polymerase II transcriptional coactivator SUB1;	46.59	268	S	ESKDANSpSDEEFA	1	1	1.0437	1.0854	-
P54000	SUB1;	RNA polymerase II transcriptional coactivator SUB1;	46.59	269	S	SKDANSSpDEEFAQ	1	1	1.0437	1.0854	-
Q06146	YL257;	Uncharacterized protein YLR257W;	26.2	48	S	LLTPQTSpSNHALS	0.927916	1	0.91228	1.0847	-
P37296	STV1;	V-type proton ATPase subunit a, Golgi isoform;	29.01	223	S	DLTRNQSpVEDLSF	0.999999	1	0.83244	1.0841	-
P47129	YJ53;	Uncharacterized protein YJR083C;	47.05	165	S	MLKGKKSpINDFFS	1	1	0.99939	1.0839	-
P47116	PTK2;	Serine/threonine-protein kinase PTK2/STK2;	59.61	711	S	KVEDNLSpEDDSTM	1	1	0.91612	1.0839	-
P14540	ALF;	Fructose-bisphosphate aldolase;	8.52	179	T	EMEIGITpGGEEDG	1	1	0.97281	1.0838	-
P53927	YNL0;	Uncharacterized RNA-binding protein YNL110C;	30.99	56	S	IEGLAASpDDEQSG	0.998011	1	0.70411	1.0836	-
P40517	YRB2;	Ran-specific GTPase-activating protein 2;	26.34	179	S	DKDKVHSpGSEQLA	0.783575	1	1.2532	1.0824	-
Q12044	RCN2;	Regulator of calcineurin 2;	12.36	152	S	KGGSSLSpPDKSSL	0.971457	1	1.0529	1.0823	-
Q12451	OSH2;	Oxysterol-binding protein homolog 2;	27.74	722	S	ESDTTASpTLGQIA	0.979544	1	0.86004	1.0822	-
P32521;A6ZVS5 A6ZVS4	PAN1;PAN1	Actin cytoskeleton-regulatory complex protein PAN1;Actin cytoskeleton-regulatory complex protein PAN1;	55.67	1135	S	YNAKQESpDDEDED	1	1	0.99073	1.082	-
P35724	MNR2;	Manganese resistance protein MNR2;	33.58	576	S	ATLDHESpISRRKS	0.999974	1	1.0445	1.0815	-
P38070	KBN8;	Probable serine/threonine-protein kinase YBR028C;	33.71	519	S	SYKASGSpYLEKYF	0.999281	1	1.1411	1.0812	-
P33748	MSN2;	Zinc finger protein MSN2;	19.88	208	S	LPNGANSpNLFIDT	0.938993	1	1.4884	1.0809	-
P16861	K6PF1;	6-phosphofructokinase subunit alpha;	84.8	179	S	AFLEATSpEDEIIS	0.999172	1	1.1307	1.0808	-
P46949	FYV8;	Protein FYV8;	14.83	112	S	LMASRESpVELQAK	1	1	1.3402	1.0806	-
P00937	TRPG;	Anthranilate synthase component 2;	41.07	2	S	_____MSpVHAATN	0.999998	1	0.96829	1.0805	-
P53897	YNP7;	Uncharacterized protein YNL157W;	84.78	7	S	MSNENLSpPNSSNP	0.999638	1	0.91277	1.0801	-
Q12044	RCN2;	Regulator of calcineurin 2;	63.15	162	T	SSLESPTpMLKLST	0.596767	1	0.84723	1.079	-
Q05541	NSE3;	Non-structural maintenance of chromosome element 3;	54.04	8	S	SSIDNDSpDVDLTE	0.99558	1	1.2463	1.0786	-
P31374	KAB7;	Probable serine/threonine-protein kinase YAL017W;	40.62	1055	S	ENGLAGSpPKDEDG	0.998573	1	0.82876	1.0778	-
P32457	CDC3;	Cell division control protein 3;	27.1	77	S	GITSSQSpEKGQVL	0.99513	1	1.0229	1.0775	-
P40154	IES2;	Ino eighty subunit 2;	26.81	176	S	YEDNEPSpISKESD	0.871193	1	1.1512	1.074	-
P38996	NAB3;	Nuclear polyadenylated RNA-binding protein 3;	22.75	86	T	NGEVINTpEEEEEE	1	1	0.98226	1.0739	-
P19880	YAP1;	AP-1-like transcription factor YAP1;	82.54	14	S	RSLDVVSpPGSLAE	0.999969	1	0.9323	1.0728	-
Q04500	UTP14;	U3 small nucleolar RNA-associated protein 14;	18.74	673	T	ESDEEHTpVKKQSS	0.99986	1	0.84768	1.0711	-
Q04279	YMX6;	Uncharacterized protein YMR086W;	33.76	628	S	QMTMSDSpVSRRAS	0.914565	1	1.0153	1.0708	-
P38174	AMPM2;	Methionine aminopeptidase 2;	73.93	9	S	DAEIENSpPASDLK	1	1	1.1873	1.0701	-
P32351	IMPX;	Sugar utilization regulatory protein IMP2;	48.37	58	S	RDSNVSSpLSRSRS	0.919796	1	1.092	1.0701	-
P53885	MDG1;	Signal transduction protein MDG1;	9.89	288	S	EKVPVSSpITSHAK	0.727602	1	0.89672	1.0694	-
P50089	YG51;	Uncharacterized protein YGR237C;	28.42	215	S	DRIETKSpMVDLSE	1	1	0.98571	1.0693	-
P53885	MDG1;	Signal transduction protein MDG1;	58.95	233	S	SRLYELSpAEDLEK	1	1	1.0826	1.0692	-
Q04500	UTP14;	U3 small nucleolar RNA-associated protein 14;	18.74	668	S	PWLANESpDEEHTV	0.992032	1	0.81149	1.0691	-
P38615	MDS1;	Serine/threonine-protein kinase MDS1/RIM11;	36.71	8	S	NIQSNNSpPNLSNN	0.995583	1	0.67906	1.0687	-
P39705	NUP60;	Nucleoporin NUP60;	45.36	89	S	DSTVNRSpVVVSAV	0.999901	1	1.0657	1.0685	-
P32900	YHU9;	Uncharacterized protein YHR149C;	30.04	167	S	SKYNVRSpATPPAI	0.690269	1	0.87943	1.0685	-
Q08926	UIP4;	ULP1-interacting protein 4;	26.73	140	S	GNVTFPSpPKTAIS	0.999805	1	1.378	1.0674	-
Q05518	PAL1;	Uncharacterized protein YDR348C;	37.79	152	S	LEESDVSpTVGNTR	0.913247	1	1.1313	1.0673	-
P47068	BBC1;	Myosin tail region-interacting protein MTI1;	33.9	634	S	RNGSINSpLTKSIS	0.992631	1	1.0175	1.067	-
Q06580	MLC2;	Myosin light chain 2;	53.96	6	S	_MDHSESpLTFNQL	0.893561	1	0.68118	1.0666	-
Q08561	IES4;	Ino eighty subunit 4;	43.24	24	T	NPKIEDTpSPPSAN	0.869603	1	1.266	1.0663	-
P27636	CDC15;	Cell division control protein 15;	19.15	311	S	KLNISPSpKFSLRA	0.5	1	0.68984	1.0663	-
Q08236	AVO1;	Target of rapamycin complex 2 subunit AVO1;	49.65	431	S	DSKDSRSpNSNEFN	0.878886	1	2.4123	1.0655	4
P20433	RPB4;	DNA-directed RNA polymerase II subunit RPB4;	26.88	134	T	VLLEQTTpGGNNKD	0.853322	1	1.2132	1.0651	-
Q08951	AP3D;	AP-3 complex subunit delta;	22.72	918	S	KTKAKNSpPEPNEF	1	1	1.1357	1.0638	-
P42845	STB1;	Protein STB1;	64.24	72	S	TLLEAISpPAKKPL	1	1	0.98022	1.0634	-
P05318	RLA1;	60S acidic ribosomal protein P1-alpha;	49.65	96	S	EEAKEESpDDDMGF	1	1	1.0348	1.0632	-
P32578	SIP1;	Protein SIP1;	24.68	268	S	ALTKTDSpIDIPVR	0.99804	1	0.94803	1.0632	-
P23301	IF5A2;	Eukaryotic translation initiation factor 5A-2;	62.43	7	T	MSDEEHTpFETADA	0.917004	1	1.1382	1.063	-
P38822	BZZ1;	Protein BZZ1;	42.95	472	S	NNAGEDSpDNNSIR	0.999948	1	1.2657	1.0628	-
P39705	NUP60;	Nucleoporin NUP60;	75.13	171	S	GNNIDQSpLILKES	1	1	0.98611	1.0627	-
P46678	TFC5;	Transcription factor TFIIIB component B;	40.66	178	S	KKIRLGSpITENDM	0.999907	1	1.0806	1.0617	-
P00330;P00331	ADH1;ADH2	Alcohol dehydrogenase 1;Alcohol dehydrogenase 2;	17.08	2	S	_____MSpIPETQK	0.996612	1	0.95457	1.0616	-
Q06681	YSP2;	GRAM domain-containing protein YSP2;	34.73	535	S	VGDEGNSpKRNSRY	1	1	0.97884	1.0613	-
Q03559	YM8V;	Uncharacterized protein YMR295C;	46.38	8	S	MHFRKKSpSISNTS	0.701423	1	1.1537	1.0597	-
P34223	UBX1;	UBX domain-containing protein 1;	28.58	108	S	KRKGSTSpPEPTKG	0.995473	1	0.83204	1.0595	-
P40463	VHS2;	Protein VHS2;	44.82	159	S	VYSRRPSpTIGLDR	0.995942	1	0.98678	1.0586	-
Q08245	ZEO1;	Protein ZEO1;	42.14	89	S	QASAAVSpEKKETK	1	1	1.0457	1.058	-
Q12263	GIN4;	Serine/threonine-protein kinase GIN4;	44.06	719	S	RSKFLGSpSFNIDK	0.5	1	0.89279	1.0578	-
P25037	UBP1;	Ubiquitin carboxyl-terminal hydrolase 1;	55.73	638	S	QEIDNVSpLDEPKI	1	1	0.83731	1.0578	-
Q08951	AP3D;	AP-3 complex subunit delta;	14.76	700	S	LKFVDDSpDTSYEE	0.82012	1	0.88214	1.0576	-
Q08951	AP3D;	AP-3 complex subunit delta;	14.76	703	S	VDDSDTSpYEEKEK	0.860016	1	0.88214	1.0576	-
Q03016	GIP3;	GLC7-interacting protein 3;	39.62	141	S	FVRKKRSpTSISNA	0.510458	1	0.96291	1.0561	-
Q08816	YO352;	Uncharacterized protein YOR352W;	19.46	133	S	PRRLSMSpQQSKFI	0.974165	1	1.2793	1.0556	-
P25558	BUD3;	Bud site selection protein 3;	27.09	1603	S	LLTKDASpYAYLKD	0.999997	1	0.714	1.0547	-
Q06146	YL257;	Uncharacterized protein YLR257W;	26.2	49	S	LTPQTSSpNHALSK	0.934278	1	0.88424	1.0542	-
P25558	BUD3;	Bud site selection protein 3;	17.61	1157	T	QASKVLTpENSNEL	1	1	0.81763	1.0541	-
P34223	UBX1;	UBX domain-containing protein 1;	41.49	224	S	VVEDNTSpQSQRRP	0.983023	1	1.0611	1.0532	-
Q05050	YMS1;	Uncharacterized protein YMR031C;	77.74	397	S	DITKIASpGLISPV	0.5	1	0.8029	1.0532	-
P02400	RLA4;	60S acidic ribosomal protein P2-beta;	49.65	100	S	EEAKEESpDDDMGF	1	1	0.89347	1.0529	-
P35732	YKF4;	Uncharacterized protein YKL054C;	32.3	258	T	PKAVKKTpESPLEN	0.5	1	1.0222	1.0526	-
P34217	PIN4;	RNA-binding protein PIN4;	53.74	466	S	MQPTLTSpPKMNIH	0.99639	1	0.94016	1.0526	-
P53879	RHO5;	GTP-binding protein RHO5;	47.01	223	S	AIYEPESpPNQKSA	1	1	0.69857	1.0526	-
P38041	BOB1;	Protein BOB1;	27.4	564	S	SRAVFDSpARRKSS	1	1	1.0369	1.0521	-
Q12427	STB3;	Protein STB3;	59.6	337	S	EKLTATSpEPTSRR	0.331775	1	0.62399	1.0513	3
P15891	ABP1;	Actin-binding protein;	10.36	167	S	KKSFTPSpKSPAPV	0.954602	1	1.349	1.0511	-
P04802	SYDC;	Aspartyl-tRNA synthetase, cytoplasmic;	40.34	2	S	_____MSpQDENIV	1	1	0.93601	1.0511	-
Q05785	ENT2;	Epsin-2;	19.54	434	S	TRTGNQSpISDKYS	0.985632	1	1.0312	1.0508	-
P38993	FET3;	Iron transport multicopper oxidase FET3;	38.03	623	T	NEDRHSTpEKHQFL	0.5	1	1.133	1.0507	-
Q12256	TPO4;	Polyamine transporter 4;	60	646	S	DNEDGYSpYTEMAT	0.999985	1	0.89019	1.0499	-
Q99271	NAH1;	Na(+)/H(+) antiporter;	24.98	472	S	WMQRLPSpLDKAGR	1	1	0.92936	1.0497	-
P39998	EDC3;	Enhancer of mRNA-decapping protein 3;	46.79	261	S	SQSRSNSpTSLPAA	0.938502	1	0.96012	1.0494	-
P38085	VAL1;	Valine/tyrosine/tryptophan amino-acid permease;	63.74	577	S	NIFVSPSpLTEIDK	0.925395	1	0.69788	1.0494	-
P36041	EAP1;	Protein EAP1;	63.56	389	S	FFKESRSpSTPNAE	0.575848	1	1.3426	1.0492	-
Q08951	AP3D;	AP-3 complex subunit delta;	64.17	890	T	KDNLSDTpEEVIVI	0.813149	1	1.231	1.0489	-
P36166	PXL1;	Paxillin-like protein 1;	34.79	63	S	TRQRNVSpAAPSVP	1	1	0.90597	1.0484	-
P06738	PHSG;	Glycogen phosphorylase;	45.99	31	T	RLTRRLTpGFLPQE	1	1	0.77512	1.0479	-
P15891	ABP1;	Actin-binding protein;	18.9	157	T	QQGKASTpPPVKKS	0.998874	1	1.021	1.0472	-
P40535	ACA2;	ATF/CREB activator 2;	42.2	557	S	YSQRFGSpDTDDDD	0.5	1	0.77323	1.0472	-
Q06336	GGA1;	ADP-ribosylation factor-binding protein GGA1;	48.43	375	S	NKVSLSSpPKSPQE	0.994058	1	0.88248	1.047	-
Q02455	MLP1;	Protein MLP1;	35.78	2	S	_____MSpDHDTPM	0.999968	1	1.0153	1.0464	-
P05030;P19657	PMA1;PMA2	Plasma membrane ATPase 1;Plasma membrane ATPase 2;	56.89	899	S	EKKSTRSpVEDFMA	1	1	1.0652	1.0463	-
Q06146	YL257;	Uncharacterized protein YLR257W;	51.94	155	S	DHISKYSpSSGTPE	0.735497	1	1.0266	1.0459	-
Q12416	WHI5;	G1-specific transcriptional repressor WHI5;	48.27	156	S	EVFLSPSpPRLRSP	0.932011	1	0.94602	1.045	-
P25558	BUD3;	Bud site selection protein 3;	82.66	1614	S	KDFVALSpDDEDED	1	1	0.84424	1.0445	-
P23201	SPA2;	Protein SPA2;	25.32	979	S	EVDKIESpPRMVRE	0.994986	1	0.88803	1.0442	-
P04147	PABP;	Polyadenylate-binding protein, cytoplasmic and nuclear;	36	405	S	RKDVRRSpQLAQQI	1	1	0.8875	1.0439	-
P53897	YNP7;	Uncharacterized protein YNL157W;	84.78	11	S	NLSPNSSpNPDLTK	0.992719	1	0.87239	1.0425	-
Q12400	TRM10;	tRNA (guanine-N(1)-)-methyltransferase TRM10;	43.17	2	S	_____MSpNDEINQ	1	1	1.2045	1.0411	-
Q08208	NOP12;	Nucleolar protein 12;	60.53	184	S	IAETEESpGNEKEE	1	1	0.96141	1.0404	-
P05319	RLA2;	60S acidic ribosomal protein P2-alpha;	32.17	43	S	KVSSVLSpALEGKS	0.999033	1	1.0964	1.0396	-
Q03661	ESC1;	Silent chromatin protein ESC1;	67.08	1326	S	QLLKNLSpDLENYS	1	1	0.87808	1.0392	-
P38854	YHV9;	Uncharacterized protein YHR159W;	34.03	435	S	RGQAEDSpGDDSSL	0.939691	1	0.93311	1.0388	-
Q08887	NDD1;	Nuclear division defective protein 1;	7.1	332	T	KKLFIKTpPQDTIN	0.873428	1	1.0862	1.0381	-
P53121	FLC3;	Putative flavin carrier protein 3;	31.33	688	T	KNENASTpDALRVE	0.932011	1	0.89901	1.0381	-
P38244	YBS4;	Uncharacterized zinc metalloprotease YBR074W;	44.44	608	S	LLKGSNSpMEEGLS	0.941882	1	0.88586	1.038	-
P25364	HCM1;	Forkhead transcription factor HCM1;	22.61	446	S	TPSRLISpTPKDGN	0.926108	1	0.56771	1.0379	3
Q06685	VIP1;	Inositol hexakisphosphate and diphosphoinositol-pentakisphosphate kinase;	46.78	31	S	SAPSEMSpPLFLNK	0.999471	1	0.7597	1.0376	-
P38623	RCK2;	Serine/threonine-protein kinase RCK2;	51.61	44	T	KDVSQITpSSPKKS	0.877022	1	0.53881	1.0376	3
P45976	FIP1;	Pre-mRNA polyadenylation factor FIP1;	52.12	50	S	KRQKFDSpPVEETP	1	1	1.3728	1.0362	-
P39101	CAJ1;	Protein CAJ1;	14.98	136	S	TEKADESpTDGGMV	0.929444	1	0.7998	1.0359	-
P00560	PGK;	Phosphoglycerate kinase;	29.15	392	T	KISHVSTpGGGASL	0.894009	1	0.70245	1.0358	-
Q04279	YMX6;	Uncharacterized protein YMR086W;	42.18	301	S	KLDNSNSpSESETV	0.656509	1	0.82946	1.0355	-
P11075	SEC7;	Protein transport protein SEC7;	25.51	779	S	ARQESRSpSLSNDV	0.886414	1	1.1429	1.0351	-
P53859	CSL4;	Exosome complex component CSL4;	21.08	90	S	STEEEKSpVDASPN	0.999897	1	1.38	1.035	-
P53897	YNP7;	Uncharacterized protein YNL157W;	84.78	2	S	_____MSpNENLSP	0.559088	1	0.90154	1.0349	-
P38822	BZZ1;	Protein BZZ1;	42.95	476	S	EDSDNNSpIRTTST	0.999751	1	0.99789	1.0348	-
P53297	PBP1;	PAB1-binding protein 1;	58.99	436	S	PSAKTVSpPTTQIS	0.999857	1	1.0297	1.0347	-
P47068	BBC1;	Myosin tail region-interacting protein MTI1;	40.13	166	S	KLKARLSpMFNQDI	0.999999	1	1.1034	1.0343	-
P07245	C1TC;	C-1-tetrahydrofolate synthase, cytoplasmic;	22.95	510	T	RLGIQKTpNPDDLT	0.999871	1	32.313	1.034	4
Q04500	UTP14;	U3 small nucleolar RNA-associated protein 14;	60.68	738	S	VDPYGGSpDDEQGD	1	1	0.95883	1.0338	-
P31374	KAB7;	Probable serine/threonine-protein kinase YAL017W;	38.75	1023	S	LSPSTESpLADSKS	0.807572	1	0.99692	1.0337	-
Q05785	ENT2;	Epsin-2;	19.54	430	T	PLKQTRTpGNQSIS	0.999722	1	0.97391	1.0337	-
P07264	LEUC;	3-isopropylmalate dehydratase;	38.51	494	T	SPKVEVTpSEDEKE	0.665467	1	1.0656	1.0336	-
P15891	ABP1;	Actin-binding protein;	18.11	313	S	GFRNEKSpPAQLWA	1	1	0.93204	1.0336	-
P32660	ATC5;	Probable phospholipid-transporting ATPase DNF1;	13.98	1496	S	QETWMTSpPKETQD	0.987167	1	0.6612	1.0335	3
P46949	FYV8;	Protein FYV8;	35.07	100	S	KEVGYLSpDGVPKL	0.999986	1	1.179	1.0333	-
P53958	BOP3;	Protein BOP3;	29.14	231	S	LHSRNLSpLPIGKF	1	1	1.1753	1.0322	-
P32471	EF1B;	Elongation factor 1-beta;	34.68	18	S	LKQLNASpLADKSY	1	1	0.88901	1.0309	-
A6ZQ47;P47136	BUD4;BUD4	Bud site selection protein 4;Bud site selection protein 4;	20.67	811	S	SIREIESpAGDITF	0.9692	1	1.9808	1.0307	4
Q12518	ENT1;	Epsin-1;	14.39	163	S	RRGTGRSpDENDDD	0.5	1	1.5295	1.0307	4
Q12518	ENT1;	Epsin-1;	14.39	160	T	GRRRRGTpGRSDEN	0.5	1	1.5295	1.0307	4
Q12420	SNU66;	66 kDa U4/U6.U5 small nuclear ribonucleoprotein component;	77.68	268	S	DSANNMSpDEDGGD	1	1	0.91413	1.0296	-
P50106	RPA14;	DNA-directed RNA polymerase I subunit RPA14;	39.64	121	S	TEKKETSpIGVSAT	0.98701	1	1.3633	1.0292	-
P32047	MLF3;	Protein MLF3;	16.21	157	S	YSRRPSSpAVSLNM	0.885246	1	1.2149	1.0282	-
P30605	ITR1;	Myo-inositol transporter 1;	57.96	55	S	IQRAPASpDDEDRI	1	1	0.78577	1.028	-
A6ZX59;Q06628	ATG13;ATG13	Autophagy-related protein 13;Autophagy-related protein 13;	35.33	429	S	TSKYSSSpFGNIRR	0.866884	1	0.96435	1.0268	-
P38809	YHP7;	Uncharacterized protein YHR097C;	51.47	76	T	YEEAAGTpPKQQAP	0.999977	1	0.77837	1.0266	-
P23201	SPA2;	Protein SPA2;	26.92	961	S	AQESIKSpPEAARK	0.98832	1	1.0325	1.0265	-
P42846	KRI1;	Protein KRI1;	56.4	486	S	FRYREVSpPESFGL	0.999981	1	0.97606	1.0263	-
A6ZM67;P50105	TAF4;TAF4	Transcription initiation factor TFIID subunit 4;Transcription initiation factor TFIID subunit 4;	23.34	80	S	VLPKNVSpPTTNLR	0.998521	1	1.2133	1.0255	-
P14164	BAF1;	Transcription factor BAF1;	54.49	720	S	DDEEDLSpDENIQP	1	1	0.96297	1.0247	-
P40059	DOT6;	Disrupter of telomere silencing protein 6;	45.89	245	S	KTLKPRSpNSHSFT	0.93464	1	1.0766	1.0246	-
P32628	RAD23;	UV excision repair protein RAD23;	50.86	104	S	ENSTEASpPSTDAS	0.568046	1	0.82873	1.0244	-
Q12019	MDN1;	Midasin;	33.66	4555	S	DEEEMLSpDIDAHD	0.999997	1	1.132	1.0239	-
Q12122	HOSM;	Homocitrate synthase, mitochondrial;	36.92	410	T	FHAELSTpPLLKPV	0.99857	1	0.82352	1.0238	-
Q05518	PAL1;	Uncharacterized protein YDR348C;	15.31	14	S	TSSRPFSpVNNPFR	0.997415	1	0.9371	1.0229	-
P31244	RAD16;	DNA repair protein RAD16;	26.24	29	T	ELSDDDTpAVKNSK	0.499987	1	1.1126	1.0226	-
P43639	CSK2B;	Casein kinase II subunit beta;	42.87	10	S	EFVEDYSpRTGSSD	1	1	0.89963	1.022	-
P53893	RIA1;	Ribosome assembly protein 1;	23.14	655	S	AGKVLKSpGTLIEK	0.894834	1	1.4901	1.0216	-
P27801	PEP3;	Vacuolar membrane protein PEP3;	11.54	793	S	MKMNEISpEDIINS	0.602564	1	1.2398	1.0216	-
P17106	CBF1;	Centromere-binding protein 1;	22.88	156	S	LEGMTSSpPMESTQ	0.846775	1	0.91102	1.0215	-
P40361	YJH0;	Uncharacterized deaminase YJL070C;	51.18	41	S	ENDGDVSpPSVLKQ	0.999976	1	0.82713	1.0213	-
Q99271	NAH1;	Na(+)/H(+) antiporter;	22.27	765	T	RLKRILTpPTSLGK	0.915823	1	1.0405	1.0212	-
P38011	GBLP;	Guanine nucleotide-binding protein subunit beta-like protein;	54.68	168	T	ADDDSVTpIISAGN	0.99301	1	0.90953	1.0201	-
P25293	NAP1;	Nucleosome assembly protein;	50.9	82	S	SLVGQDSpGYVGGL	0.999965	1	0.7857	1.0201	-
Q08412	CUE5;	Ubiquitin-binding protein CUE5;	63.95	364	T	ETTYIDTpPDTETK	0.995589	1	0.80286	1.0194	-
P15891	ABP1;	Actin-binding protein;	15.79	365	S	FEGLAASpEKEEEE	1	1	1.0318	1.0189	-
Q08287	NOP8;	60S ribosome subunit biogenesis protein NOP8;	18.23	370	S	FKLIEDSpDNDIDH	1	1	0.91587	1.0188	-
P53739	KN8R;	Probable serine/threonine-protein kinase YNR047W;	18.39	414	S	PLRRAASpEPNGLQ	0.999835	1	0.74183	1.0185	-
P53739	KN8R;	Probable serine/threonine-protein kinase YNR047W;	18.39	425	T	LQLASATpSPTSSS	0.814703	1	0.74183	1.0185	-
A7A241;P43587	YPI1;YPI1	Type 1 phosphatases regulator YPI1;Type 1 phosphatases regulator YPI1;	51.19	22	S	VGSRTVSpVEEVPA	0.674855	1	1.146	1.0184	-
P46669	RPA43;	DNA-directed RNA polymerase I subunit RPA43;	52.76	285	S	VFDDEVSpIENKES	1	1	0.73573	1.0177	-
Q12518	ENT1;	Epsin-1;	66.43	327	S	NQLVAASpSPQQLQ	0.5	1	1.0731	1.0176	-
P19158	IRA2;	Inhibitory regulator protein IRA2;	41.78	928	S	VNSLNSSpPKNLSS	0.915061	1	0.74907	1.0175	-
P31374	KAB7;	Probable serine/threonine-protein kinase YAL017W;	38.75	1020	S	KISLSPSpTESLAD	0.971878	1	0.8975	1.0174	-
P06842	STE2;	Pheromone alpha factor receptor;	48.81	366	S	SERTFVSpETADDI	0.999998	1	0.73639	1.0171	-
P27636	CDC15;	Cell division control protein 15;	19.15	309	S	EEKLNISpPSKFSL	0.980035	1	0.70568	1.0158	-
P36169	SKG1;	Suppressor of lethality of KEX2 GAS1 double null mutant protein 1;	48.2	273	T	LEDVFATpPKSAAQ	1	1	0.90237	1.0155	-
Q08581	SLK19;	Kinetochore protein SLK19;	17.99	72	S	KQDLDRSpIDYGRS	1	1	0.68745	1.0141	-
P11746	MCM1;	Pheromone receptor transcription factor;	83.48	2	S	_____MSpDIEEGT	1	1	1.1363	1.0139	-
P35197	GCS1;	ADP-ribosylation factor GTPase-activating protein GCS1;	59.75	170	T	ENRRSATpPANSSN	0.964697	1	1.11	1.013	-
P53858	BNI4;	Protein BNI4;	15.32	817	S	VKSDLTSpLGEVYV	0.901888	1	1.3639	1.0123	-
P38355	YB8B;	Uncharacterized transporter YBR287W;	20.07	231	S	MNSSFLSpSSSIGD	0.533229	1	1.2383	1.0116	-
P38355	YB8B;	Uncharacterized transporter YBR287W;	20.07	232	S	NSSFLSSpSSIGDK	0.533228	1	1.2383	1.0116	-
P38355	YB8B;	Uncharacterized transporter YBR287W;	20.07	233	S	SSFLSSSpSIGDKI	0.858054	1	1.2383	1.0116	-
Q12500	AVL9;	Late secretory pathway protein AVL9;	45.13	519	S	SIESKKSpVSQISV	0.99813	1	0.92759	1.0115	-
Q03653	EFR3;	Protein EFR3;	62.91	564	S	SRDNQISpTSDLLS	0.784152	1	1.0253	1.0102	-
P40343	VPS27;	Vacuolar protein sorting-associated protein 27;	28.07	494	S	QSVKANSpSPTTNI	0.820308	1	0.84094	1.0102	-
P48813	GNP1;	High-affinity glutamine permease;	41.92	113	S	STKDSSSpQLDNEL	0.974497	1	1.2275	1.0101	-
Q06685	VIP1;	Inositol hexakisphosphate and diphosphoinositol-pentakisphosphate kinase;	49.22	1106	T	FTPVNITpSPNLSF	0.744543	1	0.64888	1.01	3
P42845	STB1;	Protein STB1;	20.62	217	T	MAVRMPTpTPRSYH	0.664929	1	0.98602	1.0097	-
Q06146	YL257;	Uncharacterized protein YLR257W;	26.2	44	T	EASRLLTpPQTSSN	0.836062	1	0.84769	1.0095	-
P35845	OSH1;	Oxysterol-binding protein homolog 1;	9.83	692	T	KGSQESTpNTLEEI	0.588099	1	0.87338	1.0088	-
P35845	OSH1;	Oxysterol-binding protein homolog 1;	9.83	694	T	SQESTNTpLEEIVK	0.98531	1	0.87338	1.0088	-
P23201	SPA2;	Protein SPA2;	27.42	646	S	DNDKYVSpPIKAVT	0.999998	1	0.85099	1.0086	-
P11075	SEC7;	Protein transport protein SEC7;	7.55	976	S	QIKNKMSpLQEFLE	1	1	1.2783	1.0082	-
P38439	LEO1;	RNA polymerase-associated protein LEO1;	30.41	132	S	EDANNFSpDQDETT	0.999928	1	0.9015	1.0071	-
P47068	BBC1;	Myosin tail region-interacting protein MTI1;	26.6	638	S	INSLTKSpISGENR	0.76802	1	1.0201	1.0068	-
P48589	RS12;	40S ribosomal protein S12;	20.29	2	S	_____MSpDVEEVV	0.988124	1	1.022	1.0061	-
Q06440	CORO;	Coronin-like protein;	37.18	454	S	KQEAPKSpPSPLKS	0.99973	1	0.80792	1.0052	-
Q02629	NU100;	Nucleoporin NUP100/NSP100;	50.9	783	S	PDPQSKSpPNGSTS	0.991884	1	0.9015	1.0051	-
Q06685	VIP1;	Inositol hexakisphosphate and diphosphoinositol-pentakisphosphate kinase;	49.22	1107	S	TPVNITSpPNLSFQ	0.990713	1	0.73268	1.0038	-
Q00955	ACAC;	Acetyl-CoA carboxylase;	45.03	2	S	_____MSpEESLFE	0.976047	1	0.68391	1.0032	-
P39109	YCFI;	Metal resistance protein YCF1;	74.18	903	S	GNSDAISpLRRASD	1	1	0.91482	1.0029	-
A7A261;P43603	LSB3;LSB3	LAS seventeen-binding protein 3;LAS seventeen-binding protein 3;	49.25	401	S	PTSPSTSpSPKAVA	0.312474	1	0.7768	1.0027	-
A7A261;P43603	LSB3;LSB3	LAS seventeen-binding protein 3;LAS seventeen-binding protein 3;	49.25	402	S	TSPSTSSpPKAVAL	0.312474	1	0.7768	1.0027	-
Q08967	FLC1;	Flavin carrier protein 1;	39.5	771	S	MPARDLSpLSSVAN	0.999855	1	0.93431	1.0024	-
Q08967	FLC1;	Flavin carrier protein 1;	39.5	773	S	ARDLSLSpSVANAQ	0.605632	1	0.93431	1.0024	-
P17121	SAC7;	GTPase-activating protein SAC7;	38.23	16	S	SKIENVSpPSKGHV	0.999994	1	0.85914	1.0021	-
P38266	YBV8;	Uncharacterized protein YBR108W;	82.28	915	S	EMERAYSpGDISAA	1	1	1.2194	1.0014	-
P34072	MKS1;	Negative regulator of RAS-cAMP pathway;	54.37	239	S	ETSKSTSpPTLENM	0.785317	1	1.0086	1.0014	-
P45976	FIP1;	Pre-mRNA polyadenylation factor FIP1;	50.53	15	S	DKFLYGSpDSELAL	0.999948	1	1.3365	1.0013	-
P31374	KAB7;	Probable serine/threonine-protein kinase YAL017W;	38.75	1021	T	ISLSPSTpESLADS	0.675147	1	0.808	1.0013	-
P53863	JJJ1;	J protein JJJ1;	43.79	504	T	GDKGLQTpDDDEDW	1	1	0.7987	1.0011	-
Q04233	GIS4;	Protein GIS4;	28.44	707	S	ELKKIKSpSINAMS	0.612	1	1.0662	1.0005	-
P38041	BOB1;	Protein BOB1;	55.98	88	T	NLHKSPTpQESGNS	0.95794	1	0.87785	1.0004	-
Q12016	VPS68;	Vacuolar protein sorting-associated protein 68;	53.77	8	S	EADDHVSpLFRFPF	1	1	0.9099	0.99986	-
A6ZUT6;P53335	PXR1;PXR1	Protein PXR1;Protein PXR1;	16.21	106	S	GKESKISpEELDTQ	0.999741	1	1.0154	0.9988	-
P47160	ENT3;	Epsin-3;	22.6	2	S	_____MSpLEDTLA	0.859599	1	0.98443	0.99874	-
P40563	YIS3;	Uncharacterized protein YIR003W;	47.51	625	S	ISEESLSpPSEAIA	0.994331	1	0.92037	0.99717	-
P39732	GIP4;	GLC7-interacting protein 4;	43.25	570	S	NNQRSNSpLQSSTM	0.966874	1	1.0296	0.99673	-
Q12436	ZRT2;	Zinc-regulated transporter 2;	53.71	188	T	NEEIVATpPIKEKE	1	1	0.70084	0.9967	-
Q08245	ZEO1;	Protein ZEO1;	45.72	40	S	KEQAEASpIDNLKN	1	1	1.1571	0.9956	-
P06105	SC160;	Protein SCP160;	53.67	1112	S	DLSSILSpDGEEKE	0.999995	1	0.86072	0.99523	-
P43639	CSK2B;	Casein kinase II subunit beta;	13.57	111	S	GKRRNKSpPVVNKS	1	1	0.86612	0.99505	-
Q08581	SLK19;	Kinetochore protein SLK19;	52.2	216	S	GVERNDSpFNINTD	1	1	0.84813	0.99399	-
P32505	NAB2;	Nuclear polyadenylated RNA-binding protein NAB2;	55.04	2	S	_____MSpQEQYTE	1	1	1.0902	0.99391	-
Q05518	PAL1;	Uncharacterized protein YDR348C;	20.97	64	S	RTSSQLSpFPNIPE	0.839821	1	0.83922	0.99389	-
P38623	RCK2;	Serine/threonine-protein kinase RCK2;	51.61	45	S	DVSQITSpSPKKSF	0.889361	1	0.69559	0.99345	-
P38691	KSP1;	Serine/threonine-protein kinase KSP1;	20.67	827	S	EQERRLSpMEQKFK	1	1	0.92017	0.99328	-
Q06682	UBX5;	UBX domain-containing protein 5;	29.06	139	S	DEGRPESpIFNQRL	1	1	0.96721	0.99247	-
Q06449	PIN3;	[PSI+] inducibility protein 3;	36.57	4	S	___MSASpLINRSL	0.999899	1	1.0049	0.9922	-
P39969	BOI2;	Protein BOI2;	34.37	652	S	KSSFMLSpPFRQQF	0.999999	1	0.85339	0.99201	-
P40019;A6ZQX9	CHZ1;CHZ1	Histone H2A.Z-specific chaperone CHZ1;Histone H2A.Z-specific chaperone CHZ1;	43.72	68	S	NGTVEDSpESDMDD	0.997861	1	1.01	0.99178	-
P40019;A6ZQX9	CHZ1;CHZ1	Histone H2A.Z-specific chaperone CHZ1;Histone H2A.Z-specific chaperone CHZ1;	43.72	70	S	TVEDSESpDMDDAK	0.999995	1	1.01	0.99178	-
Q03063	DIG1;	Down-regulator of invasive growth 1;	25.38	395	S	SQPQQQSpPSLLQG	0.985432	1	0.89443	0.98993	-
P32628	RAD23;	UV excision repair protein RAD23;	50.86	100	S	TPGRENSpTEASPS	0.740769	1	1.1051	0.98911	-
P35724	MNR2;	Manganese resistance protein MNR2;	33.58	571	T	EKQESATpLDHESI	0.657786	1	0.85322	0.98826	-
P27705	MIG1;	Regulatory protein MIG1;	51.94	314	S	RPSSVLSpLNDLLV	0.896346	1	1.0769	0.98794	-
Q12427	STB3;	Protein STB3;	31.29	175	T	NIDGATTpPPTAVA	0.950163	1	0.72769	0.9876	-
Q12434	GDIR;	Rho GDP-dissociation inhibitor;	35.72	40	S	LDAEDESpLAKWKE	1	1	0.95079	0.98745	-
P32386	YBT1;	ATP-dependent bile acid permease;	51.25	945	S	LSRANSSpANLAAK	0.5	1	0.50288	0.98714	3
P48606	TBCA;	Tubulin-specific chaperone A;	57.29	94	S	DVSDARSpAITSAQ	0.999571	1	0.75259	0.98708	-
Q06833	YP091;	Uncharaterized PH domain-containing protein YPR091C;	60.8	622	S	DNVGNSSpDTEDMD	0.904216	1	0.7819	0.98592	-
P39732	GIP4;	GLC7-interacting protein 4;	43.25	568	S	KLNNQRSpNSLQSS	0.987571	1	1.0794	0.9858	-
P10961	HSF;	Heat shock factor protein;	84.77	545	S	LKNRANSpSTSSEN	0.979911	1	1.2985	0.985	-
P32578	SIP1;	Protein SIP1;	18.74	542	S	TLDENASpLDSEKQ	0.999792	1	0.75265	0.9848	-
P32578	SIP1;	Protein SIP1;	18.74	545	S	ENASLDSpEKQLNP	0.999712	1	0.75265	0.9848	-
Q02805	ROD1;	Protein ROD1;	29.8	722	S	PRNNSGSpSVSLQQ	0.857673	1	1.0174	0.98458	-
Q01560	NOP3;	Nucleolar protein 3;	40.14	349	S	SRGGYDSpPRGGYD	0.999998	1	0.92249	0.98406	-
Q08229	YO070;	Uncharacterized protein YOL070C;	17.97	38	S	DDRLFPSpPTTTRT	0.999415	1	0.87524	0.98395	-
Q04336	YM54;	Uncharacterized protein YMR196W;	27.42	1013	T	GTHSGLTpPQSSIS	0.988933	1	0.83435	0.98391	-
P27476	NSR1;	Nuclear localization sequence-binding protein;	29.4	344	S	VRLDFSSpPRPNND	0.9888	1	0.96328	0.98319	-
Q08561	IES4;	Ino eighty subunit 4;	54.1	2	S	_____MSpQESSVL	0.973694	1	1.107	0.98309	-
P41911	GPD2;	Glycerol-3-phosphate dehydrogenase [NAD+] 2, mitochondrial;	40.36	72	S	PIRRSDSpAVSIVH	0.977032	1	1.2098	0.9819	-
P0C2J1;Q6Q5H1	YP14B;YP14A	Transposon Ty1-PR3 Gag-Pol polyprotein;Transposon Ty1-PR3 Gag polyprotein;	63.8	420	S	NDSISKSpTTEPIQ	0.686118	1	0.92289	0.98151	-
P22943	HSP12;	12 kDa heat shock protein;	51.51	73	S	AEGQGESpLADQAR	1	1	1.0317	0.98144	-
P33749	MSN4;	Zinc finger protein MSN4;	23.03	267	T	RYSEVVTpSSFPSM	0.615643	1	1.1827	0.98046	-
Q05785	ENT2;	Epsin-2;	35.7	479	T	FINSQGTpGYKQVT	0.889962	1	0.90245	0.9804	-
P47115	YJ26;	Uncharacterized protein YJR056C;	35.87	223	S	PKLDSDSpEVDIRS	0.5	1	1.0521	0.98029	-
Q06685	VIP1;	Inositol hexakisphosphate and diphosphoinositol-pentakisphosphate kinase;	27.99	141	S	DNINSISpKTGSPH	0.83662	1	0.8566	0.97968	-
P35197	GCS1;	ADP-ribosylation factor GTPase-activating protein GCS1;	59.75	168	S	PLENRRSpATPANS	0.900393	1	1.2976	0.97878	-
Q08245	ZEO1;	Protein ZEO1;	19.05	2	S	_____MSpEIQNKA	1	1	0.97602	0.97813	-
Q12514	NOT5;	General negative regulator of transcription subunit 5;	32.37	306	T	DNSTLGTpPTTHVS	0.948359	1	0.8142	0.978	-
P38041	BOB1;	Protein BOB1;	55.98	86	S	PENLHKSpPTQESG	0.959894	1	0.93865	0.97746	-
P34216	YBE7;	Uncharacterized protein YBL047C;	60.4	248	S	ANSTGVSpSLTRHS	0.907024	1	0.64785	0.97721	3
Q12122	HOSM;	Homocitrate synthase, mitochondrial;	36.92	409	S	DFHAELSpTPLLKP	0.805221	1	0.87303	0.97694	-
Q03088	SVL3;	Styryl dye vacuolar localization protein 3;	30.41	452	T	EYKATGTpPNLRDI	0.999986	1	0.89835	0.97687	-
Q07084	SSK1;	Osomolarity two-component system protein SSK1;	27.41	351	S	GKDGNSSpPQEFKL	0.999888	1	0.67845	0.97541	-
P14164	BAF1;	Transcription factor BAF1;	25.22	467	S	TNLRSNSpIDYAKH	0.975823	1	0.90089	0.97432	-
Q06836	SYT1;	Arf guanine nucleotide exchange factor SYT1;	29.96	356	S	SRSRSQSpTSFVQG	0.938421	1	1.0984	0.9736	-
Q03063	DIG1;	Down-regulator of invasive growth 1;	81.86	272	S	VNDSYDSpPLSGTA	0.999969	1	1.0125	0.97352	-
P39523	YM11;	Uncharacterized protein YMR124W;	7.85	139	S	NGKKASSpFTQSSF	0.827029	1	1.1875	0.97336	-
P13382	DPOA;	DNA polymerase alpha catalytic subunit A;	28.98	215	S	YLEIESSpPLKLQS	0.950368	1	0.62004	0.97336	3
P47068	BBC1;	Myosin tail region-interacting protein MTI1;	33.9	631	S	RVARNGSpINSLTK	0.998991	1	0.99348	0.97313	-
P36116	VPS51;	Vacuolar protein sorting-associated protein 51;	47.69	78	S	VKDDELSpATEEDL	0.995467	1	0.85829	0.97224	-
A6ZX59;Q06628	ATG13;ATG13	Autophagy-related protein 13;Autophagy-related protein 13;	24.45	649	S	SSISPRSpIDSISS	0.995854	1	1.0803	0.97147	-
P32380	NUF1;	Protein NUF1;	66.94	60	S	KKRQRRSpIDDTID	1	1	0.88959	0.97135	-
Q08926	UIP4;	ULP1-interacting protein 4;	41.25	185	S	EENKELSpPNFSQE	0.999996	1	1.5561	0.9707	4
P0C0X0 P02380	RS28B;	40S ribosomal protein S28-B;	29.63	3	S	____MDSpKTPVTL	0.635639	1	0.97659	0.97068	-
P33748	MSN2;	Zinc finger protein MSN2;	51.12	451	S	SRRQRASpLPIIDD	1	1	1.1201	0.97034	-
Q12518	ENT1;	Epsin-1;	66.43	328	S	QLVAASSpPQQLQQ	0.999031	1	1.0728	0.97015	-
P53897	YNP7;	Uncharacterized protein YNL157W;	84.78	10	S	ENLSPNSpSNPDLT	0.878147	1	0.86278	0.96931	-
P25623	SYP1;	Suppressor of yeast profilin deletion;	31.92	390	S	SSTATSSpIYQKQR	0.925397	1	0.85582	0.96931	-
P32449	AROG;	Phospho-2-dehydro-3-deoxyheptonate aldolase, tyrosine-inhibited;	54.52	4	S	___MSESpPMFAAN	0.896861	1	0.92596	0.96824	-
P40484	MOB1;	DBF2 kinase activator protein MOB1;	87.99	36	S	NNAGSVSpPTKATP	0.995652	1	0.82939	0.9681	-
Q05050	YMS1;	Uncharacterized protein YMR031C;	83.55	161	S	AASKAYSpMTMETT	0.99992	1	1.0508	0.96658	-
Q06315	SKG3;	Protein SKG3;	20.79	701	S	KNEDLGSpLKEFEE	1	1	1.0819	0.96598	-
P47068	BBC1;	Myosin tail region-interacting protein MTI1;	26.6	640	S	SLTKSISpGENRRK	0.731908	1	1.0552	0.96492	-
P38085	VAL1;	Valine/tyrosine/tryptophan amino-acid permease;	63.74	579	T	FVSPSLTpEIDKVD	0.930204	1	0.67584	0.96447	-
P53863	JJJ1;	J protein JJJ1;	45.34	393	S	DLEKFDSpADESVK	0.999983	1	0.95344	0.96428	-
Q99271	NAH1;	Na(+)/H(+) antiporter;	38.12	774	S	SLGKIHSpLVDKGK	1	1	0.89014	0.96428	-
P38272	YBY0;	Uncharacterized protein YBR130C;	28.96	359	S	SGSIPKSpASPVLP	0.663385	1	0.78932	0.96423	-
P53252	PIL1;	Sphingolipid long chain base-responsive protein PIL1;	29.1	273	S	QVKPTLSpFKQDYE	0.999974	1	0.83414	0.96362	-
P42845	STB1;	Protein STB1;	18.36	7	S	MSQPQMSpPEKEQE	0.997905	1	0.86662	0.96247	-
P36076	YKI8;	Uncharacterized protein YKL088W;	18.01	121	S	FSPSLPSpAVSFTV	0.766716	1	0.79819	0.96204	-
Q06344	ESF1;	Pre-rRNA-processing protein ESF1;	26.24	225	S	KTDDSDSpDMDIGI	0.997095	1	0.78078	0.96163	-
P38041	BOB1;	Protein BOB1;	37.65	209	S	SNISTKSpLEPSSE	0.999973	1	1.1236	0.9611	-
P40059	DOT6;	Disrupter of telomere silencing protein 6;	25.01	491	S	MLSPTHSpPQKTLS	0.232673	1	0.77127	0.96085	-
Q04279	YMX6;	Uncharacterized protein YMR086W;	22.94	118	S	SHNRTSSpLPNQRG	0.999878	1	0.97833	0.96019	-
Q03661	ESC1;	Silent chromatin protein ESC1;	25.38	1254	S	GAYEEDSpEVFRQQ	0.999999	1	0.76987	0.95971	-
A6ZVF4;P40473	POG1;POG1	Transcriptional acticator POG1;Transcriptional acticator POG1;	55.97	168	S	NASELASpPRGHRR	1	1	1.1852	0.95966	-
P25293	NAP1;	Nucleosome assembly protein;	44.83	177	S	EKAQNDSpEEEQVK	1	1	0.9185	0.95951	-
P15891	ABP1;	Actin-binding protein;	33.33	481	S	SLPSRNSpIPAPKQ	0.832808	1	0.91092	0.95922	-
P25694	CDC48;	Cell division control protein 48;	31.79	519	S	YTKFGLSpPSKGVL	0.99723	1	0.84077	0.9588	-
P38990	PAK1;	Serine/threonine-protein kinase PAK1;	26.91	43	T	PTKSSATpNLAGMA	0.734174	1	2.1619	0.95781	4
P38810	SFB3;	SED5-binding protein 3;	8.65	726	S	DLLKYDSpLNSAQL	0.571322	1	2.2304	0.95765	4
P38810	SFB3;	SED5-binding protein 3;	8.65	750	T	HVLLEETpDLTFYD	0.649052	1	2.2304	0.95765	4
P38810	SFB3;	SED5-binding protein 3;	8.65	753	T	LEETDLTpFYDAND	0.650919	1	2.2304	0.95765	4
P38810	SFB3;	SED5-binding protein 3;	8.65	755	Y	ETDLTFYpDANDKL	0.504098	1	2.2304	0.95765	4
P48813	GNP1;	High-affinity glutamine permease;	41.92	112	S	ISTKDSSpSQLDNE	0.895797	1	0.7648	0.9576	-
P28319	CWP1;	Cell wall protein CWP1;	8.06	74	Y	KFDDDKYpAVVNED	0.860755	1	0.82059	0.95756	-
P25558	BUD3;	Bud site selection protein 3;	35.54	1443	S	LPNTPRSpINVTTS	1	1	1.0658	0.957	-
P32909	SMY2;	Protein SMY2;	37.87	70	T	STFRSNTpPLLGGR	0.999933	1	1.22	0.95685	-
P32505	NAB2;	Nuclear polyadenylated RNA-binding protein NAB2;	14.63	254	T	ESNMNFTpPTKKEG	0.9625	1	0.79657	0.95656	-
Q03016	GIP3;	GLC7-interacting protein 3;	39.62	143	S	RKKRSTSpISNAVV	0.994692	1	0.86194	0.95635	-
P24000	RL24B;	60S ribosomal protein L24-B;	12.4	9	S	VEVDSFSpGAKIYP	0.900697	1	0.79546	0.95626	-
P53629	ARE2;	Sterol O-acyltransferase 2;	52.11	175	S	NLHHRKSpSPDAVD	0.809578	1	0.73316	0.95573	-
Q08816	YO352;	Uncharacterized protein YOR352W;	54.58	105	S	PRINVSSpPFSSAT	0.95108	1	1.0947	0.95569	-
P36024	SIS2;	Protein SIS2;	50.1	54	S	PVSGRQSpISPTLS	0.860319	1	0.72436	0.95556	-
P48361	ASK10;	Protein ASK10;	70.68	808	T	FRSKVNTpPAIDDY	1	1	0.60551	0.9554	3
P41697	BUD6;	Bud site selection protein 6;	30.24	347	S	ASPRRLSpSVVTTS	0.989993	1	0.91548	0.95477	-
P47087	YJY2;	Uncharacterized protein YJR012C;	21.25	176	S	KLQINDSpDNDNDD	1	1	1.1808	0.95433	-
Q12515	YD173;	Uncharacterized protein YDL173W;	66.71	246	S	GAGNIISpPKSSRN	1	1	0.87978	0.95418	-
P39705	NUP60;	Nucleoporin NUP60;	59.41	382	S	VVVAETSpPEKKDG	0.995467	1	0.7262	0.95293	-
Q05518	PAL1;	Uncharacterized protein YDR348C;	67.13	49	S	NQSRTNSpFDMPQL	0.98364	1	0.99028	0.95225	-
Q12518	ENT1;	Epsin-1;	33.74	395	T	FINSQGTpGYRQVS	0.990488	1	1.3335	0.951	-
P40477	NU159;	Nucleoporin NUP159;	48.9	940	S	PKDGYVSpGSEISV	0.999998	1	0.79789	0.95087	-
Q06631	BFR2;	Protein BFR2;	70.63	379	S	VDDNENSpDDGLDI	1	1	1.0456	0.95056	-
Q07653	HBT1;	Protein HBT1;	33.06	41	S	SAQRKKSpFSTTKP	0.999981	1	0.81567	0.95036	-
Q04279	YMX6;	Uncharacterized protein YMR086W;	24.23	339	S	ENIELESpFIEEKG	1	1	0.90871	0.95027	-
P47115	YJ26;	Uncharacterized protein YJR056C;	35.87	221	S	KKPKLDSpDSEVDI	0.993948	1	1.3566	0.94883	-
Q07478;A6ZXP4	SUB2;SUB2	ATP-dependent RNA helicase SUB2;ATP-dependent RNA helicase SUB2;	44.8	13	S	EDLLEYSpDNEQEI	0.997544	1	0.82555	0.94881	-
P38764	RPN1;	26S proteasome regulatory subunit RPN1;	51.96	19	S	DEQSQISpPEKQTP	0.99974	1	0.85985	0.94742	-
P32386	YBT1;	ATP-dependent bile acid permease;	51.25	944	S	ILSRANSpSANLAA	0.996448	1	0.64233	0.94715	3
P43598	YFI7;	Uncharacterized protein YFR017C;	66.26	64	S	PMIRRRSpTNYMDA	0.870806	1	0.83498	0.94707	-
P36152;A7A031	DRE2;DRE2	Protein DRE2;Protein DRE2;	79.86	206	S	DDLIEDSpDDDDFS	1	1	1.0645	0.9466	-
P41895	T2FA;	Transcription initiation factor IIF subunit alpha;	51.25	655	S	ASNTVPSpPIKQEE	1	1	0.96607	0.94608	-
P06101	CDC37;	Hsp90 co-chaperone Cdc37;	31.56	367	S	QEEMDESpNAEGVE	0.999981	1	1.1402	0.94586	-
P23615	SPT6;	Transcription elongation factor SPT6;	52.3	94	S	EEDDRLSpEDDLDL	1	1	0.87925	0.94537	-
P38080	AKL1;	Serine/threonine-protein kinase AKL1;	39	1072	S	FARARQSpLDLERV	1	1	0.92296	0.94532	-
P39744	NOC2;	Nucleolar complex protein 2;	27.05	70	S	EVFKDMSpVETFFE	0.999868	1	1.067	0.94507	-
P52918	MSN5;	Protein MSN5;	7.21	572	T	NFALFLTpMLKDNV	1	1	0.79457	0.94488	-
P41895	T2FA;	Transcription initiation factor IIF subunit alpha;	33.7	673	T	VAEREETpPAPTIT	0.99846	1	2.1386	0.94462	4
Q12263	GIN4;	Serine/threonine-protein kinase GIN4;	44.06	720	S	SKFLGSSpFNIDKE	0.969072	1	0.77421	0.94434	-
P02407;P14127	RS17A;RS17B	40S ribosomal protein S17-A;40S ribosomal protein S17-B;	43.2	94	S	VSALDLSpRSNGVL	1	1	0.92464	0.94393	-
P40535	ACA2;	ATF/CREB activator 2;	42.2	559	T	QRFGSDTpDDDDID	0.999776	1	0.79912	0.94387	-
P33753	TRM2;	tRNA (uracil-5-)-methyltransferase;	38.66	93	S	DNKRLSSpPLTDSG	0.96328	1	0.78989	0.94336	-
Q04373	PUF6;	Protein PUF6;	53.4	34	S	PRISIDSpSDEESE	0.999994	1	0.75669	0.94316	-
Q04373	PUF6;	Protein PUF6;	53.4	35	S	RISIDSSpDEESEL	1	1	0.75669	0.94316	-
P39968	VAC8;	Vacuolar protein 8;	78.38	16	S	DSSDEASpVSPIAD	0.999446	1	0.83915	0.94181	-
Q05050	YMS1;	Uncharacterized protein YMR031C;	77.74	401	S	IASGLISpPVLGEV	1	1	0.88492	0.94172	-
P40484	MOB1;	DBF2 kinase activator protein MOB1;	37.85	80	S	SDHGRMSpPVLTTP	1	1	0.86248	0.94075	-
P46784	RS10B;	40S ribosomal protein S10-B;	26.15	98	S	IQERNPSpQRPQRR	1	1	0.85306	0.94055	-
Q03761	TAF12;	Transcription initiation factor TFIID subunit 12;	20.06	534	S	NGNNVASpLNTKK_	0.88977	1	0.78578	0.93949	-
Q06315	SKG3;	Protein SKG3;	49.88	580	S	KLKITDSpNLENME	0.983287	1	1.0722	0.93945	-
P27476	NSR1;	Nuclear localization sequence-binding protein;	29.4	343	S	PVRLDFSpSPRPNN	0.5	1	0.93383	0.93924	-
P17065	SEC2;	Rab guanine nucleotide exchange factor SEC2;	48	515	S	PLVEDDSpDEDQND	0.999998	1	0.7968	0.93905	-
Q12110	YL049;	Uncharacterized protein YLR049C;	46.34	127	S	RPQKNLSpVDSLIQ	0.99979	1	0.57477	0.93905	3
Q12416	WHI5;	G1-specific transcriptional repressor WHI5;	13.51	161	S	PSPRLRSpPPTAAR	0.997904	1	1.0298	0.93874	-
P43597	YFI6;	Uncharacterized protein YFR016C;	92.75	861	T	EDVEVDTpEEDAEV	1	1	0.9829	0.93866	-
P17255	VATA;	V-type proton ATPase catalytic subunit A;	45.92	858	S	KAVALGSpPDRTGS	1	1	0.92198	0.93846	-
P42845	STB1;	Protein STB1;	17.74	125	T	KEDTPSTpPRASAT	0.824474	1	1.019	0.93839	-
P33399	LAH1;	La protein homolog;	50.49	15	S	EQEKPQSpRRNSFA	1	1	0.91687	0.93778	-
P53885	MDG1;	Signal transduction protein MDG1;	9.89	291	S	PVSSITSpHAKETS	0.817555	1	0.92719	0.93704	-
P43598	YFI7;	Uncharacterized protein YFR017C;	66.26	65	T	MIRRRSTpNYMDAL	0.81414	1	0.90804	0.93697	-
A7A261;P43603	LSB3;LSB3	LAS seventeen-binding protein 3;LAS seventeen-binding protein 3;	44.02	303	S	PTNSGGSpGGKLDD	0.856285	1	0.94462	0.93678	-
P40463	VHS2;	Protein VHS2;	51.72	53	S	YLYKTVSpNNAANS	0.999503	1	1.2077	0.93675	-
Q05518	PAL1;	Uncharacterized protein YDR348C;	37.79	153	T	EESDVSTpVGNTRE	0.896318	1	0.84133	0.93674	-
P38041	BOB1;	Protein BOB1;	20.83	393	S	DKDIFESpPGRAPK	1	1	0.89712	0.93622	-
P25558	BUD3;	Bud site selection protein 3;	28.02	1566	T	RRTKALTpPERNTV	1	1	0.62328	0.93618	3
Q08287	NOP8;	60S ribosome subunit biogenesis protein NOP8;	48.33	264	T	DFDKPMTpLNDSDE	0.875348	1	0.80461	0.93592	-
P07560	SEC4;	Ras-related protein SEC4;	59.51	204	S	GNISINSpGSGNSS	0.979361	1	0.91149	0.93565	-
Q05812	MSC3;	Meiotic sister-chromatid recombination protein 3;	64.66	587	S	ESFPAASpISEGVT	0.996701	1	0.99839	0.93517	-
P38080	AKL1;	Serine/threonine-protein kinase AKL1;	21.46	1099	S	SNGKRRSpFFSVFR	0.999997	1	0.77888	0.93391	-
Q12516	YD133;	Uncharacterized membrane protein YDL133W;	70.71	43	S	NQTVRKSpGSLEAL	0.880334	1	0.86303	0.93335	-
P38266	YBV8;	Uncharacterized protein YBR108W;	37.01	843	S	KKVKDSSpPVPSDL	0.985785	1	1.1402	0.93264	-
P32568	SNQ2;	Protein SNQ2;	33.96	53	T	KLTKMLTpGPARDT	1	1	0.89636	0.93245	-
Q12675	ATC4;	Probable phospholipid-transporting ATPase DNF2;	16.52	69	S	KPMKDISpTPDLSK	0.998713	1	0.63873	0.93218	3
P35197	GCS1;	ADP-ribosylation factor GTPase-activating protein GCS1;	22.94	161	T	AQSREGTpPLENRR	0.565703	1	1.3235	0.93214	-
P40463	VHS2;	Protein VHS2;	51.72	61	S	NAANSLSpRQSSRT	0.99979	1	1.3068	0.93194	-
Q08287	NOP8;	60S ribosome subunit biogenesis protein NOP8;	48.33	268	S	PMTLNDSpDEELLT	0.998809	1	1.0024	0.93153	-
Q06106	MRD1;	Multiple RNA-binding domain-containing protein 1;	73.49	220	S	LVIENESpDDEYSA	0.999994	1	1.0086	0.93126	-
P0C0X0 P02380	RS28B;	40S ribosomal protein S28-B;	29.63	5	T	__MDSKTpPVTLAK	0.963217	1	0.8812	0.93101	-
P14540	ALF;	Fructose-bisphosphate aldolase;	40.44	310	Y	VLNKKDYpIMSPVG	0.5	1	0.98983	0.9297	-
P47068	BBC1;	Myosin tail region-interacting protein MTI1;	33.9	636	T	GSINSLTpKSISGE	0.886729	1	0.99448	0.92923	-
P38623	RCK2;	Serine/threonine-protein kinase RCK2;	51.61	46	S	VSQITSSpPKKSFQ	0.997611	1	0.63875	0.92838	3
P36169	SKG1;	Suppressor of lethality of KEX2 GAS1 double null mutant protein 1;	65.3	276	S	VFATPKSpAAQSQL	1	1	0.83032	0.92831	-
P42845	STB1;	Protein STB1;	30.8	99	T	FVEKPNTpPPSSRQ	0.999599	1	1.0902	0.92822	-
Q06146	YL257;	Uncharacterized protein YLR257W;	71.33	121	S	KKQRNKSpINSESF	1	1	1.0055	0.92708	-
P38266	YBV8;	Uncharacterized protein YBR108W;	23.42	805	T	ELTREATpGQDEVL	0.999979	1	1.3128	0.92705	-
A6ZM67;P50105	TAF4;TAF4	Transcription initiation factor TFIID subunit 4;Transcription initiation factor TFIID subunit 4;	17.71	208	T	EQNFNLTpPTKNPE	0.997908	1	1.0149	0.92694	-
Q04991	FMP42;	Protein FMP42;	56.28	269	S	RPQRRKSpVLETYV	1	1	0.79819	0.92685	-
Q06704	IMH1;	Golgin IMH1;	53.11	308	S	ITTGDISpEEETVD	0.744009	1	1.0872	0.9266	-
P38085	VAL1;	Valine/tyrosine/tryptophan amino-acid permease;	54.23	6	S	_MDDSVSpFIAKEA	0.99996	1	0.70833	0.92584	-
Q12163	NBP2;	NAP1-binding protein 2;	35	102	S	TYNKRQSpITLPDD	0.964556	1	1.1327	0.92502	-
A6ZKU1;P32790	SLA1;SLA1	Actin cytoskeleton-regulatory complex protein SLA1;Actin cytoskeleton-regulatory complex protein SLA1;	30.38	818	T	KKAAASTpPEPNLK	0.998602	1	1.1117	0.92487	-
A6ZX59;Q06628	ATG13;ATG13	Autophagy-related protein 13;Autophagy-related protein 13;	35.33	428	S	STSKYSSpSFGNIR	0.499951	1	1.116	0.92245	-
Q06146	YL257;	Uncharacterized protein YLR257W;	14.75	246	T	SISRGPTpKNKTVS	0.863573	1	0.92754	0.92234	-
A6ZT99;P38879	NACA;NACA	Nascent polypeptide-associated complex subunit alpha;Nascent polypeptide-associated complex subunit alpha;	27.91	2	S	_____MSpAIPENA	1	1	0.92899	0.92226	-
Q06833	YP091;	Uncharaterized PH domain-containing protein YPR091C;	16.12	720	S	SVSSNDSpQNSLKN	0.999163	1	0.61877	0.92216	3
Q06833	YP091;	Uncharaterized PH domain-containing protein YPR091C;	16.12	723	S	SNDSQNSpLKNGDP	0.999705	1	0.61877	0.92216	3
P39523	YM11;	Uncharacterized protein YMR124W;	34.17	348	S	QQPRTLSpLTNGPR	0.999371	1	1.2268	0.92197	-
P39705	NUP60;	Nucleoporin NUP60;	20.56	352	S	LNATKISpPSAPSK	0.75471	1	1.2876	0.9216	-
P37303	GLY1;	Low specificity L-threonine aldolase;	109.72	369	S	QIYRSESpTEVDVD	0.999111	1	1.2732	0.92155	-
Q04410	GRH1;	GRASP65 homolog protein 1;	25.4	155	S	DDLDDVSpLNHDER	0.99535	1	0.8086	0.92057	-
P40563	YIS3;	Uncharacterized protein YIR003W;	30.75	183	S	NEVTEHSpDSEDLT	0.999488	1	0.90022	0.91967	-
P38826	ORC6;	Origin recognition complex subunit 6;	21.75	105	S	RQSLSNSpSPMKQF	0.499947	1	0.91107	0.91958	-
P38826	ORC6;	Origin recognition complex subunit 6;	21.75	106	S	QSLSNSSpPMKQFA	0.499947	1	0.91107	0.91958	-
P48524	BUL1;	Ubiquitin ligase-binding protein BUL1;	37.85	70	S	SWIRSASpATGILG	0.998689	1	0.78184	0.91874	-
Q12263	GIN4;	Serine/threonine-protein kinase GIN4;	44.67	930	S	ELRKQNSpQEGDQA	1	1	0.90847	0.91807	-
P40059	DOT6;	Disrupter of telomere silencing protein 6;	25.01	489	T	ADMLSPTpHSPQKT	0.370875	1	0.73179	0.91791	-
P19807	HNM1;	Choline transport protein;	37.03	42	S	PLDDMDSpKGAVAA	1	1	0.72405	0.91756	-
P23201	SPA2;	Protein SPA2;	26.92	958	S	KITAQESpIKSPEA	0.898088	1	0.84915	0.91754	-
P42845	STB1;	Protein STB1;	17.74	124	S	RKEDTPSpTPRASA	0.991855	1	1.0948	0.91703	-
P22082	SNF2;	Transcription regulatory protein SNF2;	13.85	1375	S	LRQFEVSpDDEKND	1	1	0.91977	0.91691	-
Q12518	ENT1;	Epsin-1;	15.61	346	T	PLIQNRTpGNQSMT	0.967761	1	1.3041	0.91529	-
P32566	SMI1;	Cell wall assembly regulator SMI1;	28.27	400	S	SVQDHESpVKIVKT	0.827749	1	1.0784	0.91516	-
P38165	RTG3;	Retrograde regulation protein 3;	62.54	150	T	VDRAMNTpPLQQQE	1	1	0.91876	0.91516	-
P38682	GLO3;	ADP-ribosylation factor GTPase-activating protein GLO3;	35.54	398	S	QLFGRGSpFDEAAN	1	1	1.1427	0.91458	-
P04449	RL24A;	60S ribosomal protein L24-A;	10.01	9	S	VEIDSFSpGAKIYP	0.87037	1	0.63912	0.91455	3
P31244	RAD16;	DNA repair protein RAD16;	7.24	777	S	QDEAAISpRLTPAD	0.946843	1	0.90219	0.91454	-
P31244	RAD16;	DNA repair protein RAD16;	7.24	780	T	AAISRLTpPADLQF	0.930464	1	0.90219	0.91454	-
Q02866	MUK1;	Protein MUK1;	88.83	245	S	VGTSVSSpPNKMKT	0.999586	1	0.63203	0.91445	3
Q03653	EFR3;	Protein EFR3;	56.41	735	S	RLAPISSpLSDRSS	0.993372	1	0.67432	0.91425	-
Q06146	YL257;	Uncharacterized protein YLR257W;	46.47	137	S	SLRASKSpNSLITS	0.99967	1	0.95667	0.91422	-
P07270	PHO4;	Phosphate system positive regulatory protein PHO4;	26.2	152	S	KNKSNSSpPYLNKR	0.999591	1	0.95213	0.91422	-
P0C2J1;Q6Q5H1	YP14B;YP14A	Transposon Ty1-PR3 Gag-Pol polyprotein;Transposon Ty1-PR3 Gag polyprotein;	24.43	409	S	VSTSNNSpPSTDND	0.755561	1	0.93883	0.91339	-
P46950	SNG1;	Nitrosoguanidine resistance protein SNG1;	57.18	91	T	PLARIQTpGLFSPR	1	1	0.8777	0.91328	-
Q03063	DIG1;	Down-regulator of invasive growth 1;	81.86	269	S	NKRVNDSpYDSPLS	0.698499	1	0.93223	0.91323	-
Q08921	TCO89;	Target of rapamycin complex 1 subunit TCO89;	15.04	774	S	HQRVINSpLQPTTR	0.999643	1	1.0603	0.91291	-
P34250	YKK5;	Uncharacterized protein YKL105C;	53.1	556	S	DQEEALSpDNEPES	1	1	1.0424	0.91249	-
P38427	TSL1;	Trehalose synthase complex regulatory subunit TSL1;	52.89	77	S	SRSATRSpPSAFNR	0.99118	1	1.0835	0.91233	-
P47068	BBC1;	Myosin tail region-interacting protein MTI1;	40.44	158	S	RKVPMDSpPKLKAR	1	1	0.85538	0.91116	-
P53735	ZRG17;	Protein ZRG17;	32.32	498	S	VRPRSMSpSLPIAT	0.990798	1	0.68381	0.91093	-
Q03653	EFR3;	Protein EFR3;	22.35	774	S	DLHSLSSpRGKIFS	0.73542	1	0.81892	0.91058	-
Q12017	PLP2;	Phosducin-like protein 2;	22.67	37	T	ERAPSPTpAKLEEA	0.871985	1	1.0644	0.90909	-
P34163	TGL1;	Sterol esterase TGL1;	36.03	521	S	EQQRRLSpAYLESS	1	1	0.92831	0.90876	-
P53883	NOP13;	Nucleolar protein 13;	9.38	389	S	ATAQRGSpAAIVPS	0.544591	1	1.0531	0.90662	-
Q07653	HBT1;	Protein HBT1;	33.06	43	S	QRKKSFSpTTKPTE	0.731709	1	0.80823	0.90628	-
P17106	CBF1;	Centromere-binding protein 1;	47.41	138	T	NGERAITpPSNEGV	0.999943	1	0.96823	0.90595	-
Q12094	YO006;	UPF0293 protein YOR006C;	48.45	289	S	EAQSEESpEDEESG	0.999991	1	0.93868	0.90557	-
Q12057	PIN2;	[PSI+] induction protein 2;	39.39	194	S	ENFEGSSpPQPQYD	0.886468	1	0.87174	0.90526	-
P53917	FAR11;	Factor arrest protein 11;	37.43	18	S	PIIRSVSpLEDLKR	0.99996	1	0.76186	0.90517	-
P40463	VHS2;	Protein VHS2;	61.52	301	S	GAALSRSpPSNQQY	0.999953	1	1.1711	0.9051	-
P43574	GAT1;	Transcriptional regulatory protein GAT1;	34.79	418	S	PIPKIASpPSIPQY	0.999359	1	1.1197	0.90496	-
P53735	ZRG17;	Protein ZRG17;	32.32	499	S	RPRSMSSpLPIATK	0.771801	1	0.67836	0.90427	-
P38853	KEL1;	Kelch repeat-containing protein 1;	52.91	748	S	SDEKNVSpPMGDVP	1	1	0.80477	0.90402	-
P29465	CHS3;	Chitin synthase 3;	29.53	1160	S	LNRKEESpDSFVA_	0.5	1	0.79425	0.90387	-
Q03290	TFB3;	RNA polymerase II transcription factor B subunit 3;	30.46	258	T	KDAVPFTpPFNGDR	1	1	1.0089	0.90306	-
Q01448	HPC2;	Histone promoter control protein 2;	29.98	433	T	RLVAAPTpVSPPKI	0.5	1	0.82967	0.90212	-
Q08972	NEW1;	[NU+] prion formation protein 1;	30.57	1191	T	TPKPVDTpDDEED_	1	1	0.76956	0.90206	-
P25364	HCM1;	Forkhead transcription factor HCM1;	38.57	453	S	TPKDGNSpILRKWQ	1	1	1.1191	0.90181	-
Q12476	AIR2;	Protein AIR2;	57.44	16	T	VDTAPTTpPPDKLV	0.902904	1	0.78936	0.90095	-
P38854	YHV9;	Uncharacterized protein YHR159W;	25.89	286	S	NQSRSVSpPQDIQE	0.958418	1	1.0591	0.90025	-
Q08986	SAM3;	S-adenosylmethionine permease SAM3;	47.04	20	S	TKIETESpTTIPND	0.873951	1	0.76688	0.89973	-
Q12416	WHI5;	G1-specific transcriptional repressor WHI5;	13.51	164	T	RLRSPPTpAARRST	0.990688	1	0.89709	0.89957	-
Q05050	YMS1;	Uncharacterized protein YMR031C;	42.31	130	S	KVVRNNSpITSATS	0.999991	1	0.91112	0.89894	-
Q12494	KCS1;	Inositol hexakisphosphate kinase 1;	45.83	581	S	NARLGSSpPSFLTQ	0.993255	1	0.95287	0.89768	-
P39109	YCFI;	Metal resistance protein YCF1;	35.48	251	S	KLPRNFSpSEELSQ	0.999611	1	0.86704	0.8976	-
Q06689	YL413;	Cell membrane protein YLR413W;	29.09	665	S	IIEEHESpPIDAEK	1	1	0.6793	0.89725	-
Q12136	SAS10;	Something about silencing protein 10;	65.11	339	S	LQNSEDSpDAEDGG	1	1	0.7778	0.89608	-
P47035	NET1;	Nucleolar protein NET1;	13.1	676	T	NILPQRTpPRSAAK	1	1	0.84443	0.89533	-
P11075	SEC7;	Protein transport protein SEC7;	19.66	1220	S	VANPRVSpYESSRS	0.998751	1	1.0673	0.89521	-
P53273	YG35;	Uncharacterized vacuolar membrane protein YGR125W;	40.12	845	T	NLMSLPTpNTPRNY	0.914405	1	0.66281	0.89438	3
Q04066	BNA7;	Probable kynurenine formamidase;	54.02	9	S	NTVRAISpPDITLF	1	1	0.85739	0.89412	-
P22943	HSP12;	12 kDa heat shock protein;	43.23	21	S	EALKPDSpQKSYAE	1	1	0.67678	0.894	-
P32447	ASF1;	Histone chaperone ASF1;	48.23	270	T	STDIESTpPKDAAR	0.919	1	0.78794	0.89371	-
P39705	NUP60;	Nucleoporin NUP60;	60.21	177	S	SLILKESpGSTPIS	0.820602	1	0.81343	0.89366	-
Q02805	ROD1;	Protein ROD1;	26.24	124	S	TISSKSSpTNLAAL	0.687019	1	0.7556	0.89304	-
P35197	GCS1;	ADP-ribosylation factor GTPase-activating protein GCS1;	52.08	157	S	TPGVAQSpREGTPL	1	1	1.3713	0.89303	-
P06101	CDC37;	Hsp90 co-chaperone Cdc37;	27.13	14	S	WDKIELSpDDSDVE	1	1	0.92928	0.89206	-
P06101	CDC37;	Hsp90 co-chaperone Cdc37;	27.13	17	S	IELSDDSpDVEVHP	1	1	0.92928	0.89206	-
P53121	FLC3;	Putative flavin carrier protein 3;	31.33	687	S	PKNENASpTDALRV	0.874419	1	1.1352	0.892	-
P32047	MLF3;	Protein MLF3;	41.37	11	S	KSNSNNSpNPSFIF	0.994598	1	1.1776	0.89085	-
Q03407	PKH1;	Serine/threonine-protein kinase PKH1;	35.06	5	S	__MGNRSpLTEADH	0.499987	1	1.0382	0.89061	-
Q03407	PKH1;	Serine/threonine-protein kinase PKH1;	35.06	7	T	MGNRSLTpEADHAL	0.499987	1	1.0382	0.89061	-
P15891	ABP1;	Actin-binding protein;	28.92	183	S	EPVKTPSpPAPAAK	0.999981	1	1.0015	0.89032	-
P38854	YHV9;	Uncharacterized protein YHR159W;	29.41	369	S	PGARQKSpPSQGSV	0.719092	1	0.94462	0.89021	-
Q06511	RRP15;	Ribosomal RNA-processing protein 15;	68.22	69	S	IIDNEQSpDAEEDD	1	1	0.93423	0.88998	-
P53917	FAR11;	Factor arrest protein 11;	9.83	939	S	YGHRNSSpSQDLLN	0.950312	1	0.94463	0.88984	-
Q04991	FMP42;	Protein FMP42;	51.58	238	S	IEGDTGSpGIIPDE	0.999242	1	0.8476	0.88977	-
Q12163	NBP2;	NAP1-binding protein 2;	35	104	T	NKRQSITpLPDDYI	0.981988	1	0.93873	0.88969	-
Q06677	SWA2;	Auxilin-like clathrin uncoating factor SWA2;	50.25	264	S	LPQVNDSpPNRILF	1	1	0.88976	0.88939	-
P40507	AIR1;	Protein AIR1;	40.87	20	T	LPYVKDTpTPTGSD	0.929006	1	1.0264	0.88934	-
P34216	YBE7;	Uncharacterized protein YBL047C;	33.54	1008	S	GIPRSQSpLTSSVA	0.88301	1	0.71881	0.88915	-
P38174	AMPM2;	Methionine aminopeptidase 2;	73.93	2	T	_____MTpDAEIEN	1	1	0.92707	0.88875	-
P47068	BBC1;	Myosin tail region-interacting protein MTI1;	62.18	106	T	EPISPETpKKETLS	0.972096	1	0.94703	0.88824	-
P34216	YBE7;	Uncharacterized protein YBL047C;	60.4	241	S	NRTTPLSpANSTGV	0.999382	1	0.76989	0.88824	-
P32909	SMY2;	Protein SMY2;	44.16	128	S	HPESRVSpTPVQQH	0.5	1	0.9975	0.88794	-
Q12256	TPO4;	Polyamine transporter 4;	37.35	633	S	NEPISNSpLYSAIK	0.996178	1	0.65502	0.88672	3
P40563	YIS3;	Uncharacterized protein YIR003W;	90.12	284	S	DEESTTSpLNEKQE	0.998262	1	0.94589	0.88636	-
Q01448	HPC2;	Histone promoter control protein 2;	29.98	435	S	VAAPTVSpPPKILQ	0.998989	1	1.088	0.88627	-
P32047	MLF3;	Protein MLF3;	45.97	228	S	RILRFYSpYVDMLN	1	1	0.97583	0.88509	-
Q12161	PSH1;	RING finger protein PSH1;	47.15	382	T	DNNDDNTpEELDDP	1	1	1.0048	0.88489	-
Q12117	MRH1;	Protein MRH1;	54.17	295	T	SPRPAATpPNLSKD	0.999999	1	0.72714	0.88442	-
Q08412	CUE5;	Ubiquitin-binding protein CUE5;	25.25	50	T	TSAKDGTpPKVEEK	1	1	1.0716	0.88367	-
Q04279	YMX6;	Uncharacterized protein YMR086W;	42.97	923	S	NRLRFSSpNPENGE	0.999879	1	1.0972	0.88363	-
P43639	CSK2B;	Casein kinase II subunit beta;	42.87	2	S	_____MSpQEFVED	1	1	1.0276	0.88356	-
Q12515	YD173;	Uncharacterized protein YDL173W;	47.88	39	S	KSMSKPSpPVLLPL	0.999998	1	0.71106	0.88324	-
Q04660	ERB1;	Eukaryotic ribosome biogenesis protein 1;	70.32	23	S	RAASEESpDVEEDE	0.999999	1	0.69041	0.88272	-
P38041	BOB1;	Protein BOB1;	28.28	655	S	PLKTSLSpPINSKS	0.999986	1	0.91267	0.88254	-
P13186	KIN2;	Serine/threonine-protein kinase KIN2;	54.89	549	S	VALNNNSpPDIMTK	0.999999	1	0.68294	0.88219	-
P38959	VPS41;	Vacuolar protein sorting-associated protein 41;	41.46	44	S	EDVNVTSpPTKSVS	0.903913	1	0.78181	0.88151	-
P23201	SPA2;	Protein SPA2;	37.71	274	S	GPEQLKSpPEVQRA	1	1	0.94496	0.88106	-
P40563	YIS3;	Uncharacterized protein YIR003W;	30.75	185	S	VTEHSDSpEDLTEK	0.777242	1	0.93902	0.88094	-
P27705	MIG1;	Regulatory protein MIG1;	58.79	264	S	QQQNSLSpPRYSNT	0.999968	1	1.2092	0.87976	-
P04819	DNLI1;	DNA ligase 1;	48.6	75	S	DRMDNVSpGEEEYA	0.999986	1	0.75998	0.87953	-
P07280;P07281	RS19A;RS19B	40S ribosomal protein S19-A;40S ribosomal protein S19-B;	44.89	117	S	IGIVEISpPKGGRR	1	1	0.89075	0.87942	-
Q04279	YMX6;	Uncharacterized protein YMR086W;	28.21	352	S	KEKPLNSpDQEDVF	0.999865	1	0.79308	0.87886	-
P32486	KRE6;	Beta-glucan synthesis-associated protein KRE6;	49.71	134	S	HRAIASSpPSLNSN	0.99316	1	0.83877	0.87847	-
P53044	UFD1;	Ubiquitin fusion degradation protein 1;	24.4	354	S	KSKAPKSpPEVIEI	1	1	0.87811	0.87756	-
P38250	IST2;	Increased sodium tolerance protein 2;	13.75	730	Y	VPTVGSYpGVAGAT	0.331972	1	0.77009	0.87731	-
P40468	TAO3;	Cell morphogenesis protein PAG1;	44.74	2267	S	RMDTNDSpISVAEE	0.500001	1	0.97583	0.87651	-
P40468	TAO3;	Cell morphogenesis protein PAG1;	44.74	2269	S	DTNDSISpVAEEKD	0.500001	1	0.97583	0.87651	-
P40468	TAO3;	Cell morphogenesis protein PAG1;	44.74	2264	T	DLGRMDTpNDSISV	0.999998	1	0.97583	0.87651	-
P32628	RAD23;	UV excision repair protein RAD23;	48.13	94	T	APESATTpPGRENS	0.705946	1	0.78229	0.87641	-
Q03497	STE20;	Serine/threonine-protein kinase STE20;	44.49	573	T	AQETVTTpPTSKPA	0.65858	1	0.63939	0.8764	3
Q99271	NAH1;	Na(+)/H(+) antiporter;	22.27	768	S	RILTPTSpLGKIHS	0.977779	1	1	0.87556	-
Q08229	YO070;	Uncharacterized protein YOL070C;	11.81	2	S	_____MSpEEREEN	0.846541	1	1.108	0.87519	-
P25644	PAT1;	DNA topoisomerase 2-associated protein PAT1;	30.69	456	S	SKQRRRSpSYAFNN	0.63977	1	0.8744	0.87478	-
P53313	SDA1;	Protein SDA1;	12.79	278	S	ENFEENSpEDEDGF	1	1	0.90612	0.87447	-
P40463	VHS2;	Protein VHS2;	61.52	303	S	ALSRSPSpNQQYLL	0.605829	1	1.2137	0.87439	-
P23900	FPS1;	Glycerol uptake/efflux facilitator protein;	38.64	185	S	SRSRATSpNAGHSA	0.499958	1	1.0813	0.87337	-
P23900	FPS1;	Glycerol uptake/efflux facilitator protein;	38.64	184	T	RSRSRATpSNAGHS	0.499958	1	1.0813	0.87337	-
P27636	CDC15;	Cell division control protein 15;	30.93	946	S	TAAIGSSpPTKDER	0.920011	1	0.57747	0.87239	3
P19524	MYO2;	Myosin-2;	21.39	1121	S	LENSDLSpPNDLNL	0.937704	1	0.75219	0.87222	-
Q08548	ALE1;	Lysophospholipid acyltransferase;	35.95	610	S	MSFSGYSpPKPISK	0.82049	1	1.3385	0.8716	-
P38853	KEL1;	Kelch repeat-containing protein 1;	51.72	689	S	VAQMASSpPSKDQF	0.806867	1	0.81795	0.87157	-
P32660	ATC5;	Probable phospholipid-transporting ATPase DNF1;	11.15	1545	S	QLDNRYSpVERART	0.96845	1	0.94656	0.87144	-
P40357	SEC9;	Protein transport protein SEC9;	13.13	190	S	RNSLNHSpNSTLNV	0.569803	1	0.83988	0.87092	-
P32447	ASF1;	Histone chaperone ASF1;	48.23	265	T	KIEGGSTpDIESTP	0.974467	1	0.9185	0.87039	-
Q08887	NDD1;	Nuclear division defective protein 1;	45.88	277	T	ILNDVGTpPYAKAL	0.999996	1	1.0039	0.86985	-
P38439	LEO1;	RNA polymerase-associated protein LEO1;	67.28	372	S	GFRKQNSpPTTYGA	0.999692	1	1.0722	0.86958	-
P39521	FHL1;	Pre-rRNA-processing protein FHL1;	51.25	47	S	ITNSPTSpEVPIET	0.822334	1	0.90775	0.86695	-
Q05518	PAL1;	Uncharacterized protein YDR348C;	29.63	121	S	ATDFRRSpPPPVSR	1	1	0.98611	0.86678	-
P27705	MIG1;	Regulatory protein MIG1;	76.07	280	T	PRPRSLTpDFQGLN	0.740474	1	0.92983	0.86654	-
P22203	VATE;	V-type proton ATPase subunit E;	19.48	2	S	_____MSpSAITAL	0.618927	1	0.79576	0.86636	-
Q05050	YMS1;	Uncharacterized protein YMR031C;	59.27	763	S	EATETSSpAVQTKE	0.995081	1	1.122	0.86632	-
P27705	MIG1;	Regulatory protein MIG1;	15.39	302	S	LRAQTQSpSVQLKR	0.9115	1	0.9755	0.86594	-
Q07824	TPO1;	Polyamine transporter 1;	51.14	91	S	TKILTGSpVNEPDR	1	1	0.74118	0.86468	-
Q07824	TPO1;	Polyamine transporter 1;	51.14	89	T	RLTKILTpGSVNEP	1	1	0.74118	0.86468	-
P23201	SPA2;	Protein SPA2;	24.16	1006	S	MTVKMESpPNLKGN	1	1	0.98189	0.86411	-
P41911	GPD2;	Glycerol-3-phosphate dehydrogenase [NAD+] 2, mitochondrial;	40.36	70	S	DHPIRRSpDSAVSI	0.947957	1	0.90638	0.86353	-
P53885	MDG1;	Signal transduction protein MDG1;	57	160	S	VVELPDSpEDETQQ	0.999418	1	1.0353	0.86323	-
P38080	AKL1;	Serine/threonine-protein kinase AKL1;	68.5	801	S	ALLIELSpPLKEDA	1	1	0.90412	0.86288	-
P38085	VAL1;	Valine/tyrosine/tryptophan amino-acid permease;	39.76	84	S	RNSELESpQEKNNL	1	1	0.71011	0.86118	-
P38845	YHU6;	Uncharacterized protein YHR146W;	27.86	182	T	GTSREETpPLAEPT	0.999946	1	1.032	0.86087	-
Q03497	STE20;	Serine/threonine-protein kinase STE20;	44.49	575	T	ETVTTPTpSKPAQA	0.971398	1	0.67532	0.85983	-
A7A261;P43603	LSB3;LSB3	LAS seventeen-binding protein 3;LAS seventeen-binding protein 3;	44.02	300	S	RLAPTNSpGGSGGK	0.972115	1	0.91304	0.85944	-
P32628	RAD23;	UV excision repair protein RAD23;	50.86	128	T	QPQEEQTpATTERT	0.820191	1	0.70465	0.85927	-
Q08245	ZEO1;	Protein ZEO1;	64.03	49	T	NLKNEATpPEAEQV	1	1	1.0489	0.85919	-
P38250	IST2;	Increased sodium tolerance protein 2;	13.75	726	T	SLVKVPTpVGSYGV	0.331972	1	0.79397	0.85915	-
P53283	TPO2;	Polyamine transporter 2;	43.04	50	S	KTETVKSpLQDLGV	0.999998	1	0.66571	0.85903	3
P48361	ASK10;	Protein ASK10;	18.27	1017	T	AADQSATpAPSSPT	0.709241	1	0.90854	0.85872	-
P38854	YHV9;	Uncharacterized protein YHR159W;	29.41	371	S	ARQKSPSpQGSVSR	0.731407	1	0.93235	0.85811	-
P38826	ORC6;	Origin recognition complex subunit 6;	22.23	148	T	QLFGTPTpKVRKSQ	0.86836	1	0.78382	0.85778	-
P22943	HSP12;	12 kDa heat shock protein;	67.67	97	S	DAVEYVSpGRVHGE	1	1	1.1357	0.85737	-
Q04007	YDR86;	Uncharacterized protein YDR186C;	39.35	542	S	GRFRSLSpLMDPAL	0.898204	1	0.71375	0.85659	-
Q12697	ATC9;	Probable cation-transporting ATPase 2;	39.3	95	T	QRGRRLTpESEPLV	0.978268	1	0.55291	0.85622	3
Q08723	RPN8;	26S proteasome regulatory subunit RPN8;	16.33	327	T	SGDKEATpAPLIQR	1	1	1.3964	0.85599	-
Q12117	MRH1;	Protein MRH1;	54.17	299	S	AATPNLSpKDKKKK	0.999197	1	0.64039	0.85466	3
P34216	YBE7;	Uncharacterized protein YBL047C;	31.32	1179	S	YPAPGTSpPSHNEG	0.741908	1	0.57805	0.85456	3
P36167	SRL3;	Protein SRL3;	36.82	212	S	VDNVNVSpPLRWSS	1	1	1.0167	0.85434	-
P23201	SPA2;	Protein SPA2;	39.99	254	S	YWDVNDSpPIIKVD	1	1	0.75237	0.85429	-
O14467 Q7LGJ8 Q86ZS7	MBF1;	Multiprotein-bridging factor 1;	36.3	143	S	RGNNIGSpPLGAPK	1	1	0.81998	0.85389	-
P38628	AGM1;	Phosphoacetylglucosamine mutase;	14.11	67	S	GVMITASpHNPYQD	0.555004	1	0.78742	0.85285	-
P47129	YJ53;	Uncharacterized protein YJR083C;	25.63	156	S	FVDVNNSpPNMLKG	0.999999	1	0.74243	0.8514	-
P53313	SDA1;	Protein SDA1;	47.26	591	S	DVDMEDSpDDEKDN	1	1	0.78908	0.85091	-
P32909	SMY2;	Protein SMY2;	44.16	129	T	PESRVSTpPVQQHP	0.994832	1	0.9899	0.85086	-
P53121	FLC3;	Putative flavin carrier protein 3;	52.69	782	S	RDDSINSpLGNNKQ	1	1	0.74911	0.85062	-
P48415	SEC16;	COPII coat assembly protein SEC16;	50.02	806	S	NKYAPVSpPTVQQK	0.99955	1	0.83398	0.84904	-
P23900	FPS1;	Glycerol uptake/efflux facilitator protein;	38.64	196	T	SANTGATpNGRTTG	0.524639	1	0.79165	0.84862	-
P14922	CYC8;	General transcriptional corepressor CYC8;	31.56	741	S	KKQKLNSpPNSNIN	0.999992	1	0.74694	0.84854	-
Q08831	VTS1;	Protein VTS1;	37.44	30	S	PGAVLLSpPQSSAI	1	1	1.0603	0.848	-
Q08245	ZEO1;	Protein ZEO1;	46.17	22	T	QQKLEETpKESLQN	0.886792	1	0.92383	0.84764	-
P25443	RS2;	40S ribosomal protein S2;	9.23	2	S	_____MSpAPEAQQ	1	1	0.93587	0.84734	-
P29952	MPI;	Mannose-6-phosphate isomerase;	9.35	76	S	IISKNPSpAMLGKD	1	1	0.83045	0.8472	-
P53049	YOR1;	Oligomycin resistance ATP-dependent permease YOR1;	52.51	49	S	SSWDDKSpLLPTGE	1	1	0.83993	0.84672	-
P53278	YG3A;	Uncharacterized protein YGR130C;	10.52	286	S	QSGGSKSpGVVPTD	0.998156	1	1.0796	0.84671	-
P38070	KBN8;	Probable serine/threonine-protein kinase YBR028C;	59.07	105	S	TNTNRLSpITPQDI	0.780111	1	0.92052	0.8459	-
P11746	MCM1;	Pheromone receptor transcription factor;	83.48	8	T	SDIEEGTpPTNNGQ	0.9649	1	1.1751	0.84541	-
P53550	DCP2;	mRNA-decapping enzyme subunit 2;	52.05	751	S	VSSNQQSpPKSQHL	0.999998	1	0.83888	0.84538	-
P40517	YRB2;	Ran-specific GTPase-activating protein 2;	60.43	31	T	IDKLDGTpPKRPRE	1	1	0.82787	0.84519	-
Q06604	BSP1;	Protein BSP1;	37.6	39	S	PAGEALSpPVRSHN	1	1	0.7622	0.84443	-
Q12515	YD173;	Uncharacterized protein YDL173W;	47.88	34	S	AGNIHKSpMSKPSP	0.98662	1	0.66677	0.84438	-
Q08245	ZEO1;	Protein ZEO1;	27.17	10	T	IQNKAETpAAQDVQ	1	1	1.2514	0.84412	-
Q12057	PIN2;	[PSI+] induction protein 2;	39.39	193	S	EENFEGSpSPQPQY	0.5	1	0.85221	0.84389	-
P33448	TOM6;	Mitochondrial import receptor subunit TOM6;	31.27	16	S	AAAGAASpPQQPKS	1	1	0.82588	0.84365	-
P39705	NUP60;	Nucleoporin NUP60;	75.13	162	S	SEGEQKSpAEGNNI	1	1	1.0052	0.84201	-
P31688	TPS2;	Trehalose-phosphatase;	17.48	9	S	TTAQDNSpPKKRQR	0.999917	1	0.81451	0.84178	-
P34072	MKS1;	Negative regulator of RAS-cAMP pathway;	54.37	237	S	DNETSKSpTSPTLE	0.581436	1	1.0131	0.84173	-
P23615	SPT6;	Transcription elongation factor SPT6;	84.82	155	S	KLEDFFSpEDEEEE	1	1	0.757	0.84152	-
P25655	NOT1;	General negative regulator of transcription subunit 1;	29.64	2102	T	TINRRQTpPLQSNA	1	1	0.75773	0.84145	-
P38250	IST2;	Increased sodium tolerance protein 2;	13.75	729	S	KVPTVGSpYGVAGA	0.331972	1	0.81859	0.84137	-
P38968	SEC31;	Protein transport protein SEC31;	61.21	996	T	VPSLVATpSESPRA	0.823711	1	0.87071	0.84128	-
P32901	PTR2;	Peptide transporter PTR2;	45.57	52	S	TERYNLSpPSPEDE	0.917625	1	0.64787	0.84019	3
P46678	TFC5;	Transcription factor TFIIIB component B;	33.19	586	S	NEDNEGSpEEEPEI	1	1	1.1568	0.83978	-
P32471	EF1B;	Elongation factor 1-beta;	53.21	86	S	DVDLFGSpDDEEAD	1	1	1.0432	0.83936	-
P53890	BNI5;	Bud neck protein 5;	83.24	346	S	SLNKYDSpPVSSPI	0.999992	1	0.88059	0.83822	-
P14907	NSP1;	Nucleoporin NSP1;	48.77	5	T	__MNFNTpPQQNKT	1	1	0.89226	0.83753	-
P31244	RAD16;	DNA repair protein RAD16;	26.24	25	S	VNYNELSpDDDTAV	0.896303	1	0.853	0.83707	-
P25579	LRE1;	Laminarase-resistance protein LRE1;	44.38	125	S	EEPSFSSpPVKGVP	0.935864	1	0.87572	0.83705	-
P38854	YHV9;	Uncharacterized protein YHR159W;	51.63	244	S	VKNRAFSpPVYQNI	1	1	0.92347	0.83661	-
P33749	MSN4;	Zinc finger protein MSN4;	28.58	445	S	PFNILKSpSPAQDQ	0.959065	1	1.0581	0.83631	-
Q04279	YMX6;	Uncharacterized protein YMR086W;	57.36	449	S	LENDTTSpSPTQDL	0.813688	1	1.1795	0.83614	-
A6ZM67;P50105	TAF4;TAF4	Transcription initiation factor TFIID subunit 4;Transcription initiation factor TFIID subunit 4;	31.9	36	S	KPAFNLSpPGKASE	1	1	0.90025	0.83586	-
P47068	BBC1;	Myosin tail region-interacting protein MTI1;	62.18	103	S	DLPEPISpPETKKE	0.999991	1	0.82107	0.83582	-
P53049	YOR1;	Oligomycin resistance ATP-dependent permease YOR1;	67.86	10	S	TVGDAVSpETELEN	0.999666	1	0.69156	0.83555	-
P13185	KIN1;	Protein kinase KIN1;	18.04	592	T	MPEQAHTpSPTSRK	0.670287	1	0.61195	0.83515	3
P09064	IF2B;	Eukaryotic translation initiation factor 2 subunit beta;	63.04	116	T	AESKEGTpPSANSS	0.972903	1	0.97871	0.83484	-
Q05812	MSC3;	Meiotic sister-chromatid recombination protein 3;	22.55	80	S	SPGRRLSpTSSAAP	0.983302	1	1.0626	0.83461	-
P07278	KAPR;	cAMP-dependent protein kinase regulatory subunit;	29.64	131	T	TREKTSTpPPLPMH	0.868032	1	0.73316	0.83328	-
P13186	KIN2;	Serine/threonine-protein kinase KIN2;	17.02	706	S	SHSRTISpDYIPSA	0.999161	1	0.96283	0.83304	-
P33401	PGM1;	Phosphoglucomutase-1;	32.54	118	T	GGGIILTpASHNPG	0.627791	1	0.94304	0.83174	-
Q06631	BFR2;	Protein BFR2;	24.91	366	S	RLPELISpPVVKDS	1	1	0.89716	0.83134	-
Q06108	YP115;	Uncharaterized PH domain-containing protein YPR115W;	46.86	817	T	YRSKVNTpPAIDEN	0.999999	1	0.85957	0.83077	-
P36024	SIS2;	Protein SIS2;	27.45	47	S	KDSIINSpPVSGRQ	0.999861	1	0.83283	0.83068	-
Q04336	YM54;	Uncharacterized protein YMR196W;	19.79	1081	S	DPMDPMSpPLNKDV	1	1	0.62673	0.82974	3
P35724	MNR2;	Manganese resistance protein MNR2;	41.14	177	T	VDENSPTpDRRQSN	0.5	1	0.76621	0.8297	-
P40510	SER33;	D-3-phosphoglycerate dehydrogenase 2;	74.74	2	S	_____MSpYSAADN	0.999963	1	0.98659	0.82936	-
P27801	PEP3;	Vacuolar membrane protein PEP3;	32.68	907	S	KIDQPISpIDETEL	0.993467	1	0.90744	0.82891	-
P38826	ORC6;	Origin recognition complex subunit 6;	22.23	146	T	RNQLFGTpPTKVRK	0.902111	1	0.50574	0.82883	3
P18494	GLN3;	Nitrogen regulatory protein GLN3;	60.33	552	S	ANFNSNSpPLQQNL	0.915584	1	0.87189	0.82821	-
Q12017	PLP2;	Phosducin-like protein 2;	22.67	35	S	IPERAPSpPTAKLE	0.975289	1	1.01	0.82819	-
Q08229	YO070;	Uncharacterized protein YOL070C;	7.01	448	S	KGTLIGSpEFAQLG	0.810345	1	0.92922	0.828	-
A6ZZY2;P36114	YKR18;YKR18	Mitochondrial outer membrane protein SCY_3392;Mitochondrial outer membrane protein YKR018C;	36.05	380	S	SSNSEDSpEDEEMD	0.97948	1	0.64907	0.82796	3
A6ZQJ1;P10081	IF4A;IF4A	ATP-dependent RNA helicase eIF4A;ATP-dependent RNA helicase eIF4A;	71.7	6	T	_MSEGITpDIEESQ	0.999072	1	1.0465	0.82795	-
P20484	MAK11;	Protein MAK11;	27.61	434	S	DQSEVESpDTEELK	0.845603	1	0.9313	0.82788	-
Q08412	CUE5;	Ubiquitin-binding protein CUE5;	39.65	21	S	KSNVPESpINEDIS	0.999969	1	0.85496	0.82738	-
P36121	RPC5;	DNA-directed RNA polymerase III subunit RPC5;	59.6	61	T	VKAEDDTpGEEEED	1	1	0.85861	0.82695	-
Q08422	YO052;	AN1-type zinc finger protein YOR052C;	37.06	43	S	KIKKSDSpGTVLGA	0.961711	1	1.0595	0.82593	-
Q04214;Q12490;Q04215;Q12266	YM13B;YB11B	Transposon Ty1-MR1 Gag-Pol polyprotein;Transposon Ty1-BL Gag polyprotein;	26.57	409	S	VSTFNNSpPGPDND	0.999896	1	1.0633	0.82571	-
P42845	STB1;	Protein STB1;	24.56	253	S	IKPSASSpPQSTFK	0.996847	1	0.89373	0.82518	-
P53894	CBK1;	Serine/threonine-protein kinase CBK1;	43.93	743	T	LPFIGYTpYSRFDY	0.999993	1	0.64684	0.82518	3
P38199	YBD2;	KH domain-containing protein YBL032W;	60.33	360	S	VTERSDSpASFLEE	0.998571	1	1.195	0.82517	-
Q06616	YP174;	Nuclear envelope protein YPR174C;	29.29	175	S	SSPIHMSpPLQSRQ	0.993088	1	0.79279	0.8249	-
P32893	KRE11;	Beta-glucan synthesis-associated protein KRE11;	34.96	398	S	FSLGAASpTTSLVN	0.916735	1	0.80423	0.82471	-
P32893	KRE11;	Beta-glucan synthesis-associated protein KRE11;	34.96	399	T	SLGAASTpTSLVNS	0.511868	1	0.80423	0.82471	-
P40568	DSN1;	Kinetochore-associated protein DSN1;	34.97	69	S	QSVSNLSpPDLKFK	0.999998	1	0.93115	0.82405	-
Q08921	TCO89;	Target of rapamycin complex 1 subunit TCO89;	15.54	546	S	NSAAPASpPLSNEH	0.682893	1	0.99374	0.824	-
P15442	GCN2;	Serine/threonine-protein kinase GCN2;	29.78	577	S	SSIRRRSpFNVGSR	0.999999	1	0.79534	0.82361	-
P29465	CHS3;	Chitin synthase 3;	29.53	1162	S	RKEESDSpFVA___	0.817391	1	0.62251	0.82356	3
P31109	SNC1;	Synaptobrevin homolog 1;	54.12	13	S	FDPYALSpEHDEER	0.544627	1	0.93153	0.82346	-
P23293	BUR1;	Serine/threonine-protein kinase BUR1;	26.7	239	Y	AGSGAKYpTSVVVT	0.667087	1	0.71519	0.8233	-
Q08641	AB140;	Uncharacterized methyltransferase ABP140;	36.45	95	S	EEEGSMSpENKIYS	0.784871	1	0.98505	0.82247	-
P27514	YN86;	Uncharacterized transporter YNR013C;	44.17	297	T	TRRPSNTpFNLDAD	0.5	1	0.8253	0.82241	-
Q04279	YMX6;	Uncharacterized protein YMR086W;	42.18	306	T	NSSESETpVVNSEN	0.52803	1	0.94026	0.82191	-
P25042	ROX1;	Repressor ROX1;	47.88	265	S	SSPGKFSpSSPNSS	0.601397	1	1.7422	0.8216	4
Q04602	YDR19;	Uncharacterized transporter YDR119W;	64.07	106	S	PQDEVNSpIKGKPA	1	1	0.7423	0.82146	-
Q12263	GIN4;	Serine/threonine-protein kinase GIN4;	52.05	460	S	TIVNQSSpPTPASR	0.999263	1	0.82085	0.82071	-
P04786	TOP1;	DNA topoisomerase 1;	27.66	49	S	EAEPYDSpDEAISK	0.7697	1	1.0363	0.82054	-
Q08422	YO052;	AN1-type zinc finger protein YOR052C;	37.06	54	S	GAIPLNSpRSSSNS	0.999879	1	1.5094	0.81915	4
P16387	ODPA;	Pyruvate dehydrogenase E1 component subunit alpha, mitochondrial;	21.71	313	S	YRYGGHSpMSDPGT	0.952516	1	0.99662	0.81902	-
P39521	FHL1;	Pre-rRNA-processing protein FHL1;	51.25	44	S	KESITNSpPTSEVP	0.900737	1	0.96024	0.81887	-
P15891	ABP1;	Actin-binding protein;	33.33	478	S	IAPSLPSpRNSIPA	0.845608	1	0.87833	0.81886	-
P32047	MLF3;	Protein MLF3;	16.21	156	S	VYSRRPSpSAVSLN	0.885246	1	1.1751	0.81767	-
Q08412	CUE5;	Ubiquitin-binding protein CUE5;	71.39	407	S	DEFLINSpDDEM__	1	1	0.83543	0.81766	-
Q04322	YM52;	TBC domain-containing protein YMR192W;	15.6	37	S	ALRDEISpVPEGDE	1	1	0.89082	0.81743	-
P24276	SSD1;	Protein SSD1;	59.16	42	S	AHRRSQSpELTNLM	0.974102	1	0.90584	0.81739	-
Q06245	SEC10;	Exocyst complex component SEC10;	24.32	485	S	VDAFMHSpPRGNTH	0.999888	1	0.76376	0.81733	-
Q04279	YMX6;	Uncharacterized protein YMR086W;	25.13	874	S	VVSPGVSpSPNHTT	0.777452	1	0.86055	0.81636	-
Q06681	YSP2;	GRAM domain-containing protein YSP2;	32	572	S	LNRRSFSpPSNLGN	0.995228	1	0.75127	0.81593	-
P48234	NOL10;	Ribosome biogenesis protein ENP2;	78.5	529	S	LTAAEESpDEERIA	1	1	0.72366	0.81564	-
P29465	CHS3;	Chitin synthase 3;	70.4	147	S	DNFEESSpTQPINK	0.935197	1	0.61238	0.81542	3
P39705	NUP60;	Nucleoporin NUP60;	44.15	78	S	PGGYFHSpEISPDS	0.865265	1	0.91799	0.81435	-
P38427	TSL1;	Trehalose synthase complex regulatory subunit TSL1;	49.08	161	S	SGSRIASpPIQQQQ	1	1	1.0066	0.81264	-
P38197	YBD6;	UPF0001 protein YBL036C;	17.68	21	S	LIAQYESpVREVVN	0.500057	1	0.76813	0.81214	-
P38197	YBD6;	UPF0001 protein YBL036C;	17.68	13	T	YDEDRKTpQLIAQY	0.999885	1	0.76813	0.81214	-
P38197	YBD6;	UPF0001 protein YBL036C;	17.68	19	Y	TQLIAQYpESVREV	0.500057	1	0.76813	0.81214	-
P38085	VAL1;	Valine/tyrosine/tryptophan amino-acid permease;	29.47	44	S	EKQDEVSpGQTAEP	0.998989	1	0.85049	0.81146	-
P25628	ARE1;	Sterol O-acyltransferase 1;	38.53	21	S	KIRRLNSpAEANKR	1	1	0.88726	0.8109	-
Q07657	SHS1;	Seventh homolog of septin 1;	49.91	447	S	SPKFLNSpPDLPER	1	1	0.84614	0.81086	-
Q08921	TCO89;	Target of rapamycin complex 1 subunit TCO89;	17.03	390	T	DISSAGTpKDIEGH	0.959582	1	1.0426	0.81045	-
P53865	CNM67;	Chaotic nuclear migration protein 67;	30.42	17	S	FHERLDSpPVSENG	1	1	0.79962	0.80988	-
P53865	CNM67;	Chaotic nuclear migration protein 67;	30.42	20	S	RLDSPVSpENGEIK	1	1	0.79962	0.80988	-
Q12516	YD133;	Uncharacterized membrane protein YDL133W;	70.71	45	S	TVRKSGSpLEALQN	0.721134	1	0.73083	0.80987	-
Q03780	YD239;	Uncharacterized protein YDR239C;	35.08	683	S	GDEAYNSpDDIMAP	0.968141	1	0.91163	0.80938	-
Q03063	DIG1;	Down-regulator of invasive growth 1;	17.12	45	S	DSNIKNSpPGGNSV	0.997141	1	0.85344	0.80854	-
P53278	YG3A;	Uncharacterized protein YGR130C;	50.23	721	T	TYNDQLTpELQDKL	1	1	1.2929	0.80812	-
P25635	PWP2;	Periodic tryptophan protein 2;	35.58	651	S	DDAGENSpDLEDRI	1	1	0.69618	0.80736	-
P42838	LEM3;	Alkylphosphocholine resistance protein LEM3;	75.66	36	S	EEDVDASpEFEEDE	1	1	1.0366	0.8072	-
Q02805	ROD1;	Protein ROD1;	26.24	123	S	ITISSKSpSTNLAA	0.610292	1	0.70224	0.80681	-
P15274	AMPD;	AMP deaminase;	23.02	138	S	GKPRTLSpASAQHI	0.95202	1	0.69268	0.80644	-
Q04991	FMP42;	Protein FMP42;	40.8	249	S	DEQERQSpLIAIER	0.999952	1	0.73708	0.80559	-
P38080	AKL1;	Serine/threonine-protein kinase AKL1;	43.24	495	S	KELVKQSpSDPTIS	0.87831	1	0.80173	0.80472	-
Q05812	MSC3;	Meiotic sister-chromatid recombination protein 3;	30.84	679	S	ATDPTTSpSTNELS	0.534126	1	1.0565	0.80415	-
P40168	YNT5;	Uncharacterized protein YNL195C;	24.95	13	S	SAQAYASpDDALNM	0.701582	1	2.2416	0.80319	4
P32568	SNQ2;	Protein SNQ2;	35.81	80	S	VVSKVESpFADALS	1	1	0.86874	0.80294	-
P32568	SNQ2;	Protein SNQ2;	35.81	86	S	SFADALSpRHTTRS	1	1	0.86874	0.80294	-
P34216	YBE7;	Uncharacterized protein YBL047C;	33.54	1006	S	EYGIPRSpQSLTSS	0.695182	1	0.70664	0.80156	-
P53858	BNI4;	Protein BNI4;	76.07	809	S	DSMTPDSpPVKSDL	0.999991	1	0.84267	0.80019	-
Q00955	ACAC;	Acetyl-CoA carboxylase;	45.03	5	S	__MSEESpLFESSP	0.968362	1	0.62089	0.80007	3
Q03361	JIP4;	Uncharacterized protein JIP4;	41.77	360	S	CTRRALSpLGPEES	1	1	0.73485	0.79998	-
P38845	YHU6;	Uncharacterized protein YHR146W;	53.08	271	S	SSVTEKSpPALPQA	1	1	0.78199	0.79903	-
P38845	YHU6;	Uncharacterized protein YHR146W;	27.86	191	S	AEPTNVSpKEAPGN	0.9999	1	1.0127	0.79763	-
P27705	MIG1;	Regulatory protein MIG1;	76.07	278	S	ILPRPRSpLTDFQG	0.991479	1	0.96946	0.79748	-
P17121	SAC7;	GTPase-activating protein SAC7;	37.84	37	S	NNPKSMSpSENITV	0.91149	1	1.0138	0.79732	-
P32457	CDC3;	Cell division control protein 3;	40.53	503	S	LSINSASpPNVNHS	0.938671	1	0.67873	0.79707	-
P27514	YN86;	Uncharacterized transporter YNR013C;	44.17	295	S	KGTRRPSpNTFNLD	0.999285	1	0.76213	0.79623	-
P31109	SNC1;	Synaptobrevin homolog 1;	54.12	10	Y	STPFDPYpALSEHD	0.864703	1	0.81187	0.7962	-
P13185	KIN1;	Protein kinase KIN1;	53.84	677	S	THSRAVSpDFVPGF	1	1	0.6984	0.79416	-
P19659	MED15;	Mediator of RNA polymerase II transcription subunit 15;	29.34	1034	S	KKIKVDSpPDDPFM	0.999997	1	0.83772	0.79389	-
P38634	SIC1;	Protein SIC1;	64.11	198	S	PKNDARSpQESEDE	0.663218	1	1.4284	0.79371	-
Q03305	RMT2;	Arginine N-methyltransferase 2;	75.37	181	S	DGQKEESpVGSDDD	0.915042	1	0.68971	0.79337	-
Q12451	OSH2;	Oxysterol-binding protein homolog 2;	68.23	7	S	MSREDLSpIAEDLN	0.999981	1	0.94401	0.793	-
Q12117	MRH1;	Protein MRH1;	37.39	289	S	PKAPVASpPRPAAT	0.999113	1	0.88219	0.7927	-
Q03373	DIG2;	Down-regulator of invasive growth 2;	34.28	124	S	HLHGSKSpAPPNIT	1	1	0.82538	0.79218	-
P35724	MNR2;	Manganese resistance protein MNR2;	41.14	175	S	SFVDENSpPTDRRQ	0.999688	1	0.74802	0.79056	-
P53273	YG35;	Uncharacterized vacuolar membrane protein YGR125W;	40.12	847	T	MSLPTNTpPRNYQI	0.92821	1	0.70522	0.7905	-
Q08921	TCO89;	Target of rapamycin complex 1 subunit TCO89;	44.54	411	S	NMILSQSpTGVERR	0.774118	1	0.83597	0.78923	-
P11075	SEC7;	Protein transport protein SEC7;	25.51	780	S	RQESRSSpLSNDVR	0.972802	1	1.1357	0.78899	-
P40484	MOB1;	DBF2 kinase activator protein MOB1;	36.51	10	S	LQNFHISpPGQTIR	0.86836	1	0.67701	0.78845	-
P47104	RAV1;	Regulator of V-ATPase in vacuolar membrane protein 1;	59.65	1244	S	LFDKFGSpPSASDI	0.999497	1	0.6512	0.788	3
Q99383	HRP1;	Nuclear polyadenylated RNA-binding protein 4;	36.4	2	S	_____MSpSDEEDF	0.999999	1	0.82523	0.78713	-
Q99383	HRP1;	Nuclear polyadenylated RNA-binding protein 4;	36.4	3	S	____MSSpDEEDFN	0.999998	1	0.82523	0.78713	-
P38306	YB47;	Uncharacterized protein YBR197C;	45.52	26	S	NRRKSSSpQEGNPQ	0.994828	1	0.98488	0.78643	-
P38853	KEL1;	Kelch repeat-containing protein 1;	44.1	613	S	NQIKNNSpPILETL	1	1	0.74578	0.78605	-
P41818	GLC8;	Protein GLC8;	52.1	12	S	KNPLALSpPEQLAQ	1	1	0.82736	0.78475	-
P36094	SPC42;	Spindle pole body component SPC42;	22.99	357	T	MSETFATpPTPNNR	0.99341	1	0.85187	0.78382	-
Q03305	RMT2;	Arginine N-methyltransferase 2;	75.37	184	S	KEESVGSpDDDATA	0.987098	1	0.78843	0.78332	-
Q05050	YMS1;	Uncharacterized protein YMR031C;	48.61	2	S	_____MSpLISAVE	0.99954	1	1.2453	0.78322	-
P25364	HCM1;	Forkhead transcription factor HCM1;	22.66	479	T	LFRAIETpPIRYIT	1	1	0.91421	0.78309	-
P47129	YJ53;	Uncharacterized protein YJR083C;	41.12	62	S	LAIPISSpPQRSTT	0.990133	1	0.85484	0.7818	-
Q03063	DIG1;	Down-regulator of invasive growth 1;	23.12	126	S	KDGNLASpSNSAHF	0.923311	1	0.97327	0.78148	-
Q00402	NUM1;	Nuclear migration protein NUM1;	7.49	2162	S	DYTDIISpKSSTVK	0.999949	1	0.79569	0.78143	-
Q03714	USA1;	U1 SNP1-associating protein 1;	39.12	374	S	MPPDTRSpQSPVSF	0.995796	1	0.70373	0.78018	-
P48415	SEC16;	COPII coat assembly protein SEC16;	34.81	1602	S	VPSNYVSpSPDLVR	0.894828	1	0.80806	0.77982	-
P38112;A6ZL85	MAK5;MAK5	ATP-dependent RNA helicase MAK5;ATP-dependent RNA helicase MAK5;	74.9	678	S	LGIDVDSpDEDDIS	1	1	0.70789	0.77978	-
P47035	NET1;	Nucleolar protein NET1;	59.01	447	S	IADNNGSpPVKNSP	0.999858	1	0.75582	0.77947	-
P17121	SAC7;	GTPase-activating protein SAC7;	38.19	435	S	KITSSDSpPPIVSS	0.991967	1	0.80649	0.77863	-
P38080	AKL1;	Serine/threonine-protein kinase AKL1;	43.24	501	S	SSDPTISpEQSPRL	0.797146	1	0.73349	0.7779	-
P39523	YM11;	Uncharacterized protein YMR124W;	43.99	295	S	SANYSRSpNSLMSG	0.572964	1	1.2957	0.77727	-
P09032	EI2BG;	Translation initiation factor eIF-2B subunit gamma;	54.8	296	S	LGPQSMSpRQASFK	0.999998	1	0.74997	0.77706	-
P48415	SEC16;	COPII coat assembly protein SEC16;	50.02	808	T	YAPVSPTpVQQKQY	0.885474	1	0.85871	0.77694	-
P25293	NAP1;	Nucleosome assembly protein;	50.9	76	S	IQDRLGSpLVGQDS	1	1	0.91939	0.77641	-
Q00816	HEX2;	Protein HEX2;	25.13	1014	S	ENGNDSSp______	0.61885	1	0.83694	0.77208	-
P37303	GLY1;	Low specificity L-threonine aldolase;	109.72	367	S	PTQIYRSpESTEVD	0.970836	1	1.1801	0.77081	-
Q06505	IWS1;	Transcription factor IWS1;	45.56	15	T	PKVVEATpPEDGTA	1	1	1.1272	0.77079	-
P50942	INP52;	Inositol-1,4,5-trisphosphate 5-phosphatase 2;	30.74	1081	S	PPIRRKSpSTAPDE	0.664227	1	0.64278	0.76964	3
P39969	BOI2;	Protein BOI2;	62.38	28	S	DVSDTLSpPDFDSK	0.999998	1	0.70688	0.76943	-
P40075	SCS2;	Vesicle-associated membrane protein-associated protein SCS2;	13.12	204	T	KQTSNSTpPAPQNQ	0.957066	1	1.6264	0.76877	4
P36024	SIS2;	Protein SIS2;	50.1	56	S	SGRQSISpPTLSNA	0.999567	1	0.61883	0.76774	3
P25364	HCM1;	Forkhead transcription factor HCM1;	22.61	447	T	PSRLISTpPKDGNS	0.902344	1	0.64292	0.76759	3
P39705	NUP60;	Nucleoporin NUP60;	44.15	84	S	SEISPDSpTVNRSV	0.624403	1	1.018	0.76751	-
P22203	VATE;	V-type proton ATPase subunit E;	19.48	9	T	SAITALTpPNQVND	0.948022	1	0.85025	0.76669	-
P40563	YIS3;	Uncharacterized protein YIR003W;	90.12	277	T	KIFQNPTpDEESTT	0.999998	1	0.83338	0.76579	-
P39968	VAC8;	Vacuolar protein 8;	78.38	12	S	SCLKDSSpDEASVS	0.647743	1	0.87046	0.76542	-
Q04007	YDR86;	Uncharacterized protein YDR186C;	52.27	692	S	LLMRNNSpNSNLLF	0.999927	1	0.77118	0.76524	-
P13259	PCY1;	Choline-phosphate cytidylyltransferase;	26.85	59	T	NKDTQLTpPRKRRR	0.999987	1	0.91461	0.76481	-
P34163	TGL1;	Sterol esterase TGL1;	44.25	538	S	QLDANSSpTTALDA	0.839286	1	0.5383	0.7641	3
Q04087	LRS4;	Monopolin complex subunit LRS4;	56.24	146	S	PTIHLLSpPIVNRD	0.999999	1	1.2181	0.76333	-
P14922	CYC8;	General transcriptional corepressor CYC8;	48.36	943	S	QTSQEKSpPQENTL	1	1	0.80103	0.76198	-
Q02805	ROD1;	Protein ROD1;	26.24	125	T	ISSKSSTpNLAALP	0.688777	1	0.64573	0.76176	3
Q00684	CDC14;	Tyrosine-protein phosphatase CDC14;	40.87	467	S	VIESNNSpDDESMQ	0.845606	1	0.58836	0.761	3
P05750	RS3;	40S ribosomal protein S3;	53.78	221	S	EPILAPSpVKDYRP	1	1	0.83413	0.76064	-
P32769	HBS1;	Elongation factor 1 alpha-like protein;	49.45	124	S	WLDEEESpEGERNG	1	1	0.65957	0.76016	3
P39523	YM11;	Uncharacterized protein YMR124W;	43.99	297	S	NYSRSNSpLMSGPP	0.761658	1	1.2849	0.75989	-
P38853	KEL1;	Kelch repeat-containing protein 1;	7.1	35	T	REASLSTpPPNEKF	0.871088	1	0.73498	0.75929	-
P06102	NOT3;	General negative regulator of transcription subunit 3;	50.38	450	S	ANSRIGSpALNTPK	1	1	0.81686	0.75694	-
Q12514	NOT5;	General negative regulator of transcription subunit 5;	37.18	377	S	QPLQEMSpPKMVSQ	1	1	1.0013	0.75566	-
P23293	BUR1;	Serine/threonine-protein kinase BUR1;	26.7	240	T	GSGAKYTpSVVVTR	0.989621	1	0.72293	0.75478	-
A6ZZJ6;P32343	SSH4;SSH4	Protein SSH4;Protein SSH4;	69.09	358	S	EDPDNVSpFREALS	1	1	0.85753	0.75384	-
P47035	NET1;	Nucleolar protein NET1;	31.91	1032	S	SKIEAPSpPSVNKK	0.999417	1	0.77345	0.75325	-
P47082	AVT1;	Vacuolar amino acid transporter 1;	16.76	181	T	GAGRRFTpNNDMDS	0.999985	1	0.86002	0.75316	-
P16862	K6PF2;	6-phosphofructokinase subunit beta;	53.74	163	S	PEASAESpGLSSKV	0.869715	1	0.70627	0.75174	-
P50942	INP52;	Inositol-1,4,5-trisphosphate 5-phosphatase 2;	47.74	1016	S	ISIVSVSpPRKGES	0.998619	1	0.5674	0.75153	3
P47035	NET1;	Nucleolar protein NET1;	17.95	297	T	QRLLSGTpPIMSTM	0.969417	1	0.84728	0.75114	-
P47035	NET1;	Nucleolar protein NET1;	17.95	304	T	PIMSTMTpPNRVTL	0.994823	1	0.84728	0.75114	-
Q00816	HEX2;	Protein HEX2;	59.04	75	S	NLKRTRSpMGLLDE	1	1	0.72973	0.75083	-
P21576	VPS1;	Vacuolar protein sorting-associated protein 1;	26.6	599	S	KLAALESpPPPVLK	1	1	0.86883	0.75	-
Q12436	ZRT2;	Zinc-regulated transporter 2;	23.41	170	S	NNEAAYSpIHNDKT	0.975541	1	0.77975	0.74887	-
P04786	TOP1;	DNA topoisomerase 1;	27.66	54	S	DSDEAISpKISKKK	0.641902	1	1.0537	0.74877	-
P34223	UBX1;	UBX domain-containing protein 1;	55.79	322	S	PIPGESSpPAEVPK	0.998774	1	0.62274	0.74862	3
Q05050	YMS1;	Uncharacterized protein YMR031C;	12.24	681	S	AMKDVASpARGDDK	1	1	1.1657	0.74799	-
Q04602	YDR19;	Uncharacterized transporter YDR119W;	27.86	189	S	ADNQTSSpSKSLHI	0.874137	1	0.77011	0.74787	-
P47818	CCC1;	Protein CCC1;	43.85	71	S	LENSPMSpVGKDNR	0.999916	1	0.776	0.74692	-
Q05518	PAL1;	Uncharacterized protein YDR348C;	19.78	436	T	GVRRSKTpVNSPNR	0.993885	1	1.1816	0.74656	-
P34216	YBE7;	Uncharacterized protein YBL047C;	31.32	1178	T	KYPAPGTpSPSHNE	0.88525	1	0.77624	0.74617	-
P38931	SSN2;	Mediator of RNA polymerase II transcription subunit 13;	30.36	425	S	SNDLENSpPLKTEL	0.999997	1	0.66743	0.7461	-
P32336	NUD1;	Protein NUD1;	31.79	21	S	ENLTINSpPRKLRS	0.976953	1	0.44496	0.74579	3
Q12451	OSH2;	Oxysterol-binding protein homolog 2;	19.43	443	S	EVIQPSSpVSLYRR	0.699582	1	0.77609	0.7438	-
P34223	UBX1;	UBX domain-containing protein 1;	55.79	321	S	SPIPGESpSPAEVP	0.703451	1	0.58995	0.74355	3
Q03661	ESC1;	Silent chromatin protein ESC1;	13.88	308	S	DAEKDESpQGAEGT	0.99735	1	0.71776	0.74308	-
P48563	MON2;	Protein MON2;	59.51	566	S	TRNISTSpSVTTSP	0.602478	1	0.81487	0.74224	-
P38968	SEC31;	Protein transport protein SEC31;	61.21	999	S	LVATSESpPRASIS	0.999999	1	0.84363	0.74164	-
P40517	YRB2;	Ran-specific GTPase-activating protein 2;	26.34	181	S	DKVHSGSpEQLANA	0.499942	1	0.73539	0.74077	-
Q12416	WHI5;	G1-specific transcriptional repressor WHI5;	19.62	215	T	LAPAVQTpPPRRYH	0.999359	1	0.70128	0.74065	-
Q12010	YO092;	Uncharacterized membrane protein YOL092W;	47.89	147	S	EMAAPSSpDGNAGD	0.94529	1	0.81733	0.74057	-
Q08548	ALE1;	Lysophospholipid acyltransferase;	58.07	512	S	EKDISASpSPNLGG	0.499994	1	1.0147	0.74034	-
P40956	GTS1;	Protein GTS1;	43.3	249	T	AAATTSTpPPLPRR	0.92973	1	0.86123	0.73955	-
P21192	ACE2;	Metallothionein expression activator;	12.96	249	S	GATNSNSpKPGSPV	0.928682	1	0.87981	0.73917	-
P21192	ACE2;	Metallothionein expression activator;	12.96	253	S	SNSKPGSpPVILKT	0.991393	1	0.87981	0.73917	-
P53278	YG3A;	Uncharacterized protein YGR130C;	30.6	44	S	FLQKVVSpNEPKGK	1	1	1.1015	0.7391	-
P00445	SODC;	Superoxide dismutase [Cu-Zn];	82.56	39	S	YEIAGNSpPNAERG	1	1	0.74486	0.73722	-
P47035	NET1;	Nucleolar protein NET1;	59.01	439	S	SLQRSQSpSIADNN	0.733962	1	0.62731	0.73534	3
P02407;P14127	RS17A;RS17B	40S ribosomal protein S17-A;40S ribosomal protein S17-B;	58.75	125	S	LSVINVSpAQRDRR	1	1	1.0203	0.73533	-
Q08217	KOE5;	Probable serine/threonine-protein kinase YOL045W;	27.13	118	T	RHTRNLTpETATLS	0.997911	1	0.94179	0.73473	-
P50944	AVT4;	Vacuolar amino acid transporter 4;	59.42	35	T	PRRAQSTpVLNSNP	0.5	1	0.89676	0.7337	-
Q02875	YP105;	Uncharacterized protein YPL105C;	46.04	33	T	SNSNTPTpMNNAAL	0.973802	1	0.90798	0.73174	-
Q06451	TPO3;	Polyamine transporter 3;	93.48	132	S	NEDALESpDNNEKG	0.999999	1	0.84423	0.73124	-
P23201	SPA2;	Protein SPA2;	50.16	883	S	PLGNVESpPDMTQK	0.999992	1	0.67732	0.72952	-
P50944	AVT4;	Vacuolar amino acid transporter 4;	59.42	34	S	IPRRAQSpTVLNSN	0.99631	1	0.75357	0.72908	-
Q06407	RGA2;	Rho-type GTPase-activating protein 2;	31.02	320	T	NEIIVNTpPRNSTD	1	1	0.60952	0.72782	3
Q12451	OSH2;	Oxysterol-binding protein homolog 2;	44.73	825	S	EPKTDQSpLKNFKA	0.998757	1	0.90956	0.72756	-
P06786	TOP2;	DNA topoisomerase 2;	53.17	1314	T	ATSKENTpPEQDDV	1	1	0.65913	0.72734	3
P14540	ALF;	Fructose-bisphosphate aldolase;	40.44	313	S	KKDYIMSpPVGNPE	0.999978	1	0.68027	0.72683	-
P32660	ATC5;	Probable phospholipid-transporting ATPase DNF1;	57.65	1506	S	TQDLLQSpPQFQQA	1	1	0.9195	0.72627	-
P43585	VTC2;	Vacuolar transporter chaperone 2;	36.99	657	S	KLMGVDSpEEEEIE	1	1	0.86833	0.72612	-
Q08773	ISW2;	ISWI chromatin-remodeling complex ATPase ISW2;	40.73	831	S	DIRNEGSpDAEEEE	1	1	0.80086	0.72552	-
P39928	SLN1;	Osmosensing histidine protein kinase SLN1;	35.18	833	S	FNKAPGSpDDEEGG	1	1	0.7639	0.72546	-
P38968	SEC31;	Protein transport protein SEC31;	61.21	992	S	KNSRVPSpLVATSE	1	1	0.90783	0.72539	-
P25587	LDB16;	Protein LDB16;	51.19	241	S	KLRRNASpDADIVN	1	1	0.67287	0.7225	-
P89105	CTR9;	RNA polymerase-associated protein CTR9;	14.39	381	T	KLGLGQTpQIKNNL	1	1	0.83177	0.72128	-
Q12436	ZRT2;	Zinc-regulated transporter 2;	23.41	162	S	MDSDPVSpFNNEAA	0.844751	1	0.7815	0.72003	-
Q12436	ZRT2;	Zinc-regulated transporter 2;	23.41	169	Y	FNNEAAYpSIHNDK	0.576313	1	0.7815	0.72003	-
Q08229	YO070;	Uncharacterized protein YOL070C;	19.01	66	S	PSRLLRSpPAGDVS	0.996689	1	0.82915	0.72	-
P38177	YBI6;	Uncharacterized protein YBL086C;	38.87	439	S	SDKDNNSpVEDNNP	0.999382	1	0.81439	0.71971	-
P05319	RLA2;	60S acidic ribosomal protein P2-alpha;	51.63	71	S	PAAGPASpAGGAAA	0.999998	1	0.92447	0.71955	-
P18494	GLN3;	Nitrogen regulatory protein GLN3;	60.33	550	S	SSANFNSpNSPLQQ	0.499999	1	0.79081	0.71857	-
P00445	SODC;	Superoxide dismutase [Cu-Zn];	82.56	32	S	SEPTTVSpYEIAGN	0.659126	1	0.81744	0.71507	-
P17106	CBF1;	Centromere-binding protein 1;	24.41	148	T	EGVKPNTpSLEGMT	0.622491	1	0.95065	0.71413	-
A6ZM67;P50105	TAF4;TAF4	Transcription initiation factor TFIID subunit 4;Transcription initiation factor TFIID subunit 4;	19.1	49	S	LSHSLPSpPSQIKS	0.970549	1	0.87173	0.71394	-
Q9P305	IGO2;	Protein IGO2;	45.63	119	S	SISRQGSpISSGPP	0.82656	1	21.942	0.71304	4
P53735	ZRG17;	Protein ZRG17;	32.32	496	S	PSVRPRSpMSSLPI	0.96271	1	0.59162	0.7107	3
P25042	ROX1;	Repressor ROX1;	47.88	267	S	PGKFSSSpPNSSVL	0.747311	1	1.8512	0.71041	4
P39678	MBP1;	Transcription factor MBP1;	57.1	215	S	QLPSIRSpTMGPQS	0.630319	1	0.93701	0.70938	-
P25558	BUD3;	Bud site selection protein 3;	21.01	1063	S	QRIDTQSpEFLRAA	0.992647	1	1.1064	0.70886	-
P40059	DOT6;	Disrupter of telomere silencing protein 6;	25.01	487	S	SDADMLSpPTHSPQ	0.827669	1	0.81146	0.70846	-
Q05050	YMS1;	Uncharacterized protein YMR031C;	51.74	649	S	KQLEVDSpLINERK	1	1	1.0622	0.70828	-
P32047	MLF3;	Protein MLF3;	45.87	179	S	TLPSSESpSPASPD	0.887701	1	1.0155	0.70751	-
P06102	NOT3;	General negative regulator of transcription subunit 3;	50.38	454	T	IGSALNTpPKLSTS	0.999617	1	0.92172	0.70721	-
A6ZQ47;P47136	BUD4;BUD4	Bud site selection protein 4;Bud site selection protein 4;	37.83	91	S	GLLRVNSpELEESP	0.999993	1	0.86951	0.70685	-
Q06704	IMH1;	Golgin IMH1;	74.69	825	S	SGRVSRSpGSIGTL	0.733237	1	0.97956	0.70641	-
P34217	PIN4;	RNA-binding protein PIN4;	28.26	541	S	LRNSQISpPPNSQI	0.644678	1	0.65501	0.70611	3
P47035	NET1;	Nucleolar protein NET1;	19.17	385	S	LKEGPSSpPASILP	0.790269	1	0.67548	0.70604	-
Q12445	POM34;	Nucleoporin POM34;	35.73	294	S	YMMNSQSpPRGKI_	0.999982	1	0.58064	0.70586	3
P39678	MBP1;	Transcription factor MBP1;	57.1	223	T	MGPQSPTpLGILEE	0.636511	1	0.91384	0.70572	-
Q8J0M4	YCB2;	UPF0357 protein YCL012C;	33.5	71	S	RNFDIISpENSNDV	0.999697	1	1.1316	0.70562	-
P41920	YRB1;	Ran-specific GTPase-activating protein 1;	38.38	60	S	GDDAPESpPDIHFE	1	1	0.84169	0.70535	-
P00942	TPIS;	Triosephosphate isomerase;	38.4	71	S	NAYLKASpGAFTGE	0.999672	1	0.89691	0.70447	-
Q06451	TPO3;	Polyamine transporter 3;	14.33	38	S	SESGSKSpNMAPNQ	1	1	0.81638	0.70443	-
Q12246	LCB4;	Sphingoid long chain base kinase 4;	15.75	160	S	SQDNSPSpLGIKDN	0.876197	1	0.83458	0.70392	-
P02407;P14127	RS17A;RS17B	40S ribosomal protein S17-A;40S ribosomal protein S17-B;	43.2	89	S	QYVPEVSpALDLSR	0.999997	1	0.90712	0.70368	-
P39104	PIK1;	Phosphatidylinositol 4-kinase PIK1;	41.73	10	S	ASSSKKSpFDDTIE	0.999901	1	0.85644	0.70156	-
P41832	BNI1;	Protein BNI1;	45.52	1889	S	TSEDLPSpPSKTSA	0.995218	1	0.62726	0.70072	3
P48563	MON2;	Protein MON2;	59.51	564	S	QHTRNISpTSSVTT	0.988111	1	0.90959	0.70019	-
P48415	SEC16;	COPII coat assembly protein SEC16;	34.81	1603	S	PSNYVSSpPDLVRR	0.894049	1	0.71798	0.69998	-
P38634	SIC1;	Protein SIC1;	11.88	191	S	KNWNNNSpPKNDAR	1	1	0.99141	0.69969	-
P34223	UBX1;	UBX domain-containing protein 1;	55.79	315	S	QGQRLGSpPIPGES	1	1	0.7664	0.69904	-
P28708	KKL6;	Probable serine/threonine-protein kinase YKL116C;	28.19	132	S	IAPANLSpPQRVVS	1	1	0.66843	0.69696	-
P17106	CBF1;	Centromere-binding protein 1;	24.41	155	S	SLEGMTSpSPMEST	0.693588	1	0.96633	0.69527	-
P47129	YJ53;	Uncharacterized protein YJR083C;	41.12	61	S	RLAIPISpSPQRST	0.886792	1	0.86474	0.69512	-
P33749	MSN4;	Zinc finger protein MSN4;	18.18	317	T	TERRGSTpISPTTT	0.581804	1	1.2054	0.69427	-
P39705	NUP60;	Nucleoporin NUP60;	46.02	458	S	PVQPDLSpVTPQKS	0.49996	1	0.73716	0.69242	-
P14737	RAD9;	DNA repair protein RAD9;	48.05	56	S	TNIIEGSpPKANPN	0.999997	1	0.79205	0.69072	-
Q03088	SVL3;	Styryl dye vacuolar localization protein 3;	40.1	662	S	SQTRLNSpMPTHSI	0.995079	1	0.85504	0.69018	-
Q07878	VPS13;	Vacuolar protein sorting-associated protein 13;	39.82	1715	S	LAVLDPSpILGERS	1	1	0.77957	0.68966	-
Q04839	GFD1;	mRNA transport factor GFD1;	45.17	106	S	QKATEISpPPPVSP	0.998475	1	0.7374	0.68941	-
P40531	GVP36;	Protein GVP36;	24.11	316	T	EEEKPQTpAISMND	0.627056	1	0.77039	0.68907	-
P31244	RAD16;	DNA repair protein RAD16;	41.32	109	S	KEERDVSpDDDEPL	1	1	0.6222	0.68792	3
A7A261;P43603	LSB3;LSB3	LAS seventeen-binding protein 3;LAS seventeen-binding protein 3;	49.25	397	S	RFTAPTSpPSTSSP	0.910977	1	0.73053	0.68746	-
P00445	SODC;	Superoxide dismutase [Cu-Zn];	82.56	24	S	VKFEQASpESEPTT	0.839918	1	0.86325	0.68713	-
P0C2J1	YP14B;	Transposon Ty1-PR3 Gag-Pol polyprotein;	44.91	1081	S	KTVPQISpDQETEK	0.999282	1	0.68756	0.6871	-
P19524	MYO2;	Myosin-2;	31.34	1097	T	TSVLPQTpPLKDVM	0.999812	1	0.57931	0.68662	3
Q12451	OSH2;	Oxysterol-binding protein homolog 2;	19.43	445	S	IQPSSVSpLYRRPS	0.784646	1	0.7625	0.68543	-
P27637	BUD14;	Bud site selection protein 14;	35.27	668	S	SGSRALSpNTNMSD	0.996816	1	1.2551	0.68478	-
P32047	MLF3;	Protein MLF3;	22.68	306	S	QSARQYSpNNANNN	0.936279	1	1.3784	0.6839	-
P53252	PIL1;	Sphingolipid long chain base-responsive protein PIL1;	21.75	233	T	LDDSPVTpPGETRP	0.92845	1	0.91691	0.68242	-
Q12044	RCN2;	Regulator of calcineurin 2;	45.76	183	S	EPLPKLSpRSSSST	0.999998	1	0.90229	0.68205	-
Q08548	ALE1;	Lysophospholipid acyltransferase;	58.07	513	S	KDISASSpPNLGGI	0.939978	1	0.98091	0.68186	-
P32047	MLF3;	Protein MLF3;	15.11	297	S	ATSPYVSpPQQSAR	0.967458	1	0.81717	0.68056	-
P89105	CTR9;	RNA polymerase-associated protein CTR9;	42.25	1015	S	AAKKTLSpDSDEDD	0.991127	1	0.70377	0.68043	-
P89105	CTR9;	RNA polymerase-associated protein CTR9;	42.25	1017	S	KKTLSDSpDEDDDD	1	1	0.70377	0.68043	-
P23337	GYS1;	Glycogen [starch] synthase isoform 1;	33.04	651	S	KIARPLSpVPGSPK	1	1	0.97264	0.68035	-
Q06616	YP174;	Nuclear envelope protein YPR174C;	21.93	158	S	TENLPPSpPVRAVN	0.999977	1	0.77709	0.68003	-
P00817	IPYR;	Inorganic pyrophosphatase;	62.74	266	S	DAIPPASpPKADAP	1	1	0.77003	0.67969	-
Q02875	YP105;	Uncharacterized protein YPL105C;	46.04	27	S	SDTAALSpNSNTPT	0.997906	1	0.86106	0.67958	-
Q04839	GFD1;	mRNA transport factor GFD1;	45.17	111	S	ISPPPVSpPSKMKT	0.995825	1	0.73308	0.67685	-
P32486	KRE6;	Beta-glucan synthesis-associated protein KRE6;	43.25	116	S	NNSRAVSpTANDNS	0.856248	1	0.69246	0.67645	-
P0C2J1;Q6Q5H1	YP14B;YP14A	Transposon Ty1-PR3 Gag-Pol polyprotein;Transposon Ty1-PR3 Gag polyprotein;	24.43	411	S	TSNNSPSpTDNDSI	0.661573	1	0.91986	0.67585	-
P33401	PGM1;	Phosphoglucomutase-1;	32.54	120	S	GIILTASpHNPGGP	0.794213	1	0.53624	0.67419	3
P21524	RIR1;	Ribonucleoside-diphosphate reductase large chain 1;	20.52	816	S	EASREASpPAPTGS	0.994611	1	0.77256	0.67417	-
P38903	2A5D;	Serine/threonine-protein phosphatase 2A 56 kDa regulatory subunit delta isoform;	24.81	257	T	DLELIKTpPQRHSS	0.999934	1	0.78347	0.67351	-
Q08831	VTS1;	Protein VTS1;	23.63	311	S	ASQRSKSpAEPHVN	0.999255	1	0.91368	0.6726	-
P40020	FIR1;	Factor interacting with REF2;	34.6	450	S	FLKVDTSpPVNQSF	0.993549	1	0.79819	0.6726	-
P39705	NUP60;	Nucleoporin NUP60;	46.02	460	T	QPDLSVTpPQKSSS	0.997228	1	0.64996	0.67142	3
Q08412	CUE5;	Ubiquitin-binding protein CUE5;	25.87	386	T	PLDTTPTpKVNAVS	0.67996	1	0.58949	0.67131	3
P38634	SIC1;	Protein SIC1;	64.11	201	S	DARSQESpEDEEDI	0.998932	1	1.3305	0.6703	-
P32047	MLF3;	Protein MLF3;	45.87	183	S	SESSPASpPDLKLS	0.999747	1	0.89353	0.66971	-
P47035	NET1;	Nucleolar protein NET1;	23.02	212	T	GSMRVSTpPLARQI	0.999994	1	0.64101	0.66922	3
P38070	KBN8;	Probable serine/threonine-protein kinase YBR028C;	59.07	107	T	TNRLSITpPQDIIS	0.499997	1	0.96362	0.66666	1
P36062	AVT3;	Vacuolar amino acid transporter 3;	25.75	119	S	HLIRNPSpNSLQLQ	0.999231	1	0.95391	0.66588	1
P38070	KBN8;	Probable serine/threonine-protein kinase YBR028C;	25.62	82	T	SKFPILTpPPNTRR	0.996674	1	0.72565	0.66456	1
Q06833	YP091;	Uncharaterized PH domain-containing protein YPR091C;	25.5	669	S	PVPRRPSpQPLNTL	0.999995	1	0.70053	0.66401	1
Q03088	SVL3;	Styryl dye vacuolar localization protein 3;	24.09	551	S	SIPRKPSpFPQLQQ	0.999998	1	0.66068	0.664	3
P48563	MON2;	Protein MON2;	59.51	567	S	RNISTSSpVTTSPV	0.983059	1	1.0153	0.66052	1
P38633	MED31;	Mediator of RNA polymerase II transcription subunit 31;	29.28	11	T	NGNAPATpPSSDQN	0.98871	1	0.87185	0.65852	1
P46682	AP3B;	AP-3 complex subunit beta;	41.12	724	S	GINDGDSpNSISGK	0.995122	1	0.55151	0.6582	3
P39705	NUP60;	Nucleoporin NUP60;	39.6	10	S	KSLRRASpATVPSA	0.995111	1	0.74637	0.6578	1
P16387	ODPA;	Pyruvate dehydrogenase E1 component subunit alpha, mitochondrial;	21.71	309	Y	EYETYRYpGGHSMS	0.580839	1	0.86691	0.65762	1
P06842	STE2;	Pheromone alpha factor receptor;	45.72	398	S	GPFADASpYKEGEV	1	1	0.66809	0.65749	1
P23585	HXT2;	High-affinity glucose transporter HXT2;	52.98	29	T	IVQKLETpDESPIQ	1	1	0.70909	0.65685	1
P54784	ORC1;	Origin recognition complex subunit 1;	34.16	237	S	TQTAQISpDAETRA	0.999998	1	0.64096	0.65484	3
P39969	BOI2;	Protein BOI2;	29.88	519	S	GGGKALSpPIPSPT	1	1	0.77118	0.65429	1
P39969	BOI2;	Protein BOI2;	29.88	523	S	ALSPIPSpPTRNSV	0.999484	1	0.77118	0.65429	1
P53278	YG3A;	Uncharacterized protein YGR130C;	31.78	254	T	TSIGKGTpADSAQI	0.5	1	0.86052	0.654	1
P07248	ADR1;	Regulatory protein ADR1;	63.19	325	S	YTYSSGSpPTRAYV	0.915609	1	0.75905	0.65389	1
P32660	ATC5;	Probable phospholipid-transporting ATPase DNF1;	55.63	1552	S	VERARTSpLDLPGV	0.499975	1	0.81082	0.65336	1
P32660	ATC5;	Probable phospholipid-transporting ATPase DNF1;	55.63	1551	T	SVERARTpSLDLPG	0.499975	1	0.81082	0.65336	1
P19807	HNM1;	Choline transport protein;	16.33	549	S	EFSVAASpDVELEN	0.988903	1	0.61575	0.65318	3
P21192	ACE2;	Metallothionein expression activator;	37.31	80	S	DIPLVPSpPKTGDG	1	1	0.72392	0.65293	1
P17891	CLC1;	Clathrin light chain;	48.08	52	S	ILETEASpPAKDDD	0.990034	1	0.74368	0.65193	1
P32047	MLF3;	Protein MLF3;	16.21	160	S	RPSSAVSpLNMALL	0.970928	1	1.1366	0.65025	1
Q08422	YO052;	AN1-type zinc finger protein YOR052C;	34.11	2	S	_____MSpDINEIE	1	1	1.308	0.64938	1
P19807	HNM1;	Choline transport protein;	16.33	545	S	EDSREFSpVAASDV	0.731518	1	0.73285	0.64873	1
P38196	FUI1;	Uridine permease;	24.56	11	S	DSGFDNSpSKTMKD	0.499998	1	0.51391	0.64764	3
P38196	FUI1;	Uridine permease;	24.56	12	S	SGFDNSSpKTMKDD	0.499998	1	0.51391	0.64764	3
P08456	PSS;	CDP-diacylglycerol--serine O-phosphatidyltransferase;	9.38	4	S	___MVESpDEDFAP	0.998915	1	0.48597	0.64738	3
P32909	SMY2;	Protein SMY2;	26.86	602	S	PIGTVVSpPYSKTN	0.999998	1	0.76103	0.64697	1
P39678	MBP1;	Transcription factor MBP1;	57.1	221	S	STMGPQSpPTLGIL	0.62195	1	1.097	0.64676	1
P32457	CDC3;	Cell division control protein 3;	40.53	509	S	SPNVNHSpPVPTKK	0.966631	1	0.74533	0.6464	1
Q06336	GGA1;	ADP-ribosylation factor-binding protein GGA1;	29.08	353	S	NTPSVTSpPSKSLQ	0.633461	1	0.6197	0.64583	3
P43597	YFI6;	Uncharacterized protein YFR016C;	51.9	529	S	SEAGEKSpSIIEIE	0.751676	1	0.73902	0.645	1
Q07657	SHS1;	Seventh homolog of septin 1;	12.39	6	T	_MSTASTpPPINLF	0.887438	1	0.62245	0.64228	3
A7A261;P43603	LSB3;LSB3	LAS seventeen-binding protein 3;LAS seventeen-binding protein 3;	49.25	399	S	TAPTSPSpTSSPKA	0.718612	1	0.73571	0.64108	1
P23585	HXT2;	High-affinity glucose transporter HXT2;	52.98	32	S	KLETDESpPIQTKS	0.999994	1	0.55392	0.63956	3
A7A261;P43603	LSB3;LSB3	LAS seventeen-binding protein 3;LAS seventeen-binding protein 3;	50.67	384	T	RISSASTpPQTSQG	0.881765	1	1.0317	0.63901	1
P38634	SIC1;	Protein SIC1;	23.99	2	T	_____MTpPSTPPR	0.901515	1	0.9518	0.63883	1
P36148	GPT2;	Glycerol-3-phosphate O-acyltransferase 2;	36.09	668	S	ALSRVNSpRGSLTD	0.993628	1	1.0396	0.63767	1
P36148	GPT2;	Glycerol-3-phosphate O-acyltransferase 2;	36.09	671	S	RVNSRGSpLTDIPI	0.982672	1	1.0396	0.63767	1
Q9P305	IGO2;	Protein IGO2;	45.63	128	S	SGPPPRSpPNK___	1	1	0.9303	0.63528	1
P34216	YBE7;	Uncharacterized protein YBL047C;	16.13	1100	S	VSSIQESpPKISAQ	0.869954	1	0.77807	0.63508	1
P32047	MLF3;	Protein MLF3;	45.87	180	S	LPSSESSpPASPDL	0.586558	1	0.78618	0.63393	1
Q12176	MAK21;	Ribosome biogenesis protein MAK21;	57.07	710	S	VDYEYESpDAEEEQ	0.998089	1	0.67369	0.63306	1
A6ZZR4;P35734	ASK1;ASK1	DASH complex subunit ASK1;DASH complex subunit ASK1;	30.64	156	S	LKLPDSSpDEDTGS	0.979416	1	0.80826	0.63203	1
P38080	AKL1;	Serine/threonine-protein kinase AKL1;	43.24	504	S	PTISEQSpPRLNTQ	0.999962	1	0.6082	0.63202	3
Q03640	TCB3;	Tricalbin-3;	69	1350	T	LNSTSVTpPRASLD	0.999989	1	0.8298	0.629	1
P11792	SCH9;	Serine/threonine-protein kinase SCH9;	30.97	726	S	MTATPLSpPAMQAK	0.999978	1	0.55243	0.62716	3
P40956	GTS1;	Protein GTS1;	43.3	248	S	SAAATTSpTPPLPR	0.787598	1	0.76329	0.62652	1
P48570	HOSC;	Homocitrate synthase, cytosolic isozyme;	35.18	395	S	NFHAEVSpTPQVLS	0.907336	1	0.63126	0.62575	1
P13574	STE12;	Protein STE12;	48.33	400	S	NKEKLVSpPSDPTS	0.999915	1	0.62456	0.6241	3
P53719	YN87;	Uncharacterized protein YNR014W;	30.7	136	S	NFQRRASpEPQLPS	1	1	1.4884	0.62283	4
P13185	KIN1;	Protein kinase KIN1;	17.75	764	S	AQKFEGSpDDDENH	1	1	0.4249	0.62158	3
P43598	YFI7;	Uncharacterized protein YFR017C;	38.48	14	S	TPQVSTSpPTFERS	0.95762	1	0.58292	0.62082	3
P34223	UBX1;	UBX domain-containing protein 1;	28.98	331	T	EVPKNETpPAAQEQ	1	1	0.71024	0.62075	1
Q04279	YMX6;	Uncharacterized protein YMR086W;	25.67	654	S	QFRSIRSpNSPSPP	0.820424	1	0.78678	0.62043	1
P21268	FAR1;	Cyclin-dependent kinase inhibitor FAR1;	46.42	361	S	TDPFDLSpDDEKLD	1	1	0.56939	0.61972	3
P32449	AROG;	Phospho-2-dehydro-3-deoxyheptonate aldolase, tyrosine-inhibited;	54.52	2	S	_____MSpESPMFA	0.872306	1	1.1728	0.61939	1
P27637	BUD14;	Bud site selection protein 14;	43.32	254	S	DDYQPLSpPPRELD	0.999979	1	1.0214	0.61722	1
P49686	NUP42;	Nucleoporin NUP42;	71.2	137	S	SNPFGKSpPGSMGS	0.994576	1	0.76091	0.61541	1
P41696	AZF1;	Asparagine-rich zinc finger protein AZF1;	28.23	342	T	PVADNVTpNNMKGK	0.997363	1	0.62435	0.61348	1
P06242	KIN28;	Serine/threonine-protein kinase KIN28;	19.42	162	T	APHEILTpSNVVTR	0.798859	1	0.56524	0.61338	3
P13259	PCY1;	Choline-phosphate cytidylyltransferase;	25.96	346	S	KLIREASpPATEFA	0.968597	1	0.47843	0.61303	3
P13185	KIN1;	Protein kinase KIN1;	14.46	614	T	EYALSPTpPQGNDY	0.700528	1	0.44898	0.61138	3
P37370	VRP1;	Verprolin;	62.91	522	S	VRPSPISpPSINPP	0.999999	1	0.68159	0.61044	1
P40318	SSM4;	E3 ubiquitin-protein ligase Doa10;	47.78	5	S	__MDVDSpDVNVSR	0.999931	1	0.72493	0.60894	1
P38968	SEC31;	Protein transport protein SEC31;	19.22	980	S	SSVSMVSpPPPLHK	0.581591	1	0.67066	0.60662	1
Q99385	VCX1;	Vacuolar calcium ion transporter;	49.78	5	T	__MDATTpPLLTVA	0.787061	1	0.8636	0.60514	1
P50109	PSP2;	Protein PSP2;	29.91	340	S	PLSKLDSpPALELQ	1	1	0.90056	0.605	1
P34072	MKS1;	Negative regulator of RAS-cAMP pathway;	49.9	558	S	NTSIANSpNGNGND	0.853673	1	0.98914	0.6044	1
P32499	NUP2;	Nucleoporin NUP2;	41.64	20	S	TYDSNESpDDDVTP	0.998915	1	0.84023	0.6026	1
Q05050	YMS1;	Uncharacterized protein YMR031C;	42.28	720	T	NVEDLPTpQLEKIE	1	1	1.4799	0.60135	1
P39936	IF4F2;	Eukaryotic initiation factor 4F subunit p130;	32.63	196	T	PFEKEATpPVLPAN	1	1	0.85945	0.60052	1
P06738	PHSG;	Glycogen phosphorylase;	29.65	18	T	MITEEPTpSPHQIP	0.499979	1	1.0404	0.60033	1
P40477	NU159;	Nucleoporin NUP159;	82.34	805	S	RLPETPSpDEDGEV	0.999961	1	0.66387	0.59903	1
P13185	KIN1;	Protein kinase KIN1;	18.04	593	S	PEQAHTSpPTSRKS	0.583792	1	0.6714	0.59835	1
Q12263	GIN4;	Serine/threonine-protein kinase GIN4;	27.94	744	S	IAPQRLSpEERVVS	0.999891	1	0.81679	0.59813	1
P38903	2A5D;	Serine/threonine-protein phosphatase 2A 56 kDa regulatory subunit delta isoform;	24.81	250	T	TKLNPDTpDLELIK	0.934512	1	0.9399	0.59796	1
P23337	GYS1;	Glycogen [starch] synthase isoform 1;	23.49	655	S	PLSVPGSpPKVRSN	0.998417	1	1.1383	0.59716	1
Q08581	SLK19;	Kinetochore protein SLK19;	36.43	7	T	MNEVPTTpPVRLIL	0.985198	1	0.77539	0.59592	1
P33322	CBF5;	H/ACA ribonucleoprotein complex subunit 4;	21.8	378	T	GRVNENTpPEQWKK	1	1	0.6509	0.59479	1
P39008	POP2;	Poly(A) ribonuclease POP2;	47.85	39	S	MGPQVYSpPKVNRA	0.895238	1	0.66677	0.58941	1
P48570	HOSC;	Homocitrate synthase, cytosolic isozyme;	35.18	396	T	FHAEVSTpPQVLSA	0.975451	1	0.64312	0.58551	1
P19263	MED14;	Mediator of RNA polymerase II transcription subunit 14;	46.58	7	S	MTTTIGSpPQMLAN	0.99859	1	0.69015	0.58549	1
P08456	PSS;	CDP-diacylglycerol--serine O-phosphatidyltransferase;	61.2	34	S	ENDGYASpDEVGGT	1	1	0.77378	0.58465	1
P40074	AVT6;	Vacuolar amino acid transporter 6;	22.54	344	S	EVIEEESpIYQPKE	0.980168	1	0.67606	0.58347	1
Q02725	VTC3;	Vacuolar transporter chaperone 3;	18.28	592	S	RRLSKISpVPDGKT	1	1	0.55546	0.58325	3
O13297 Q12197	CET1;	mRNA-capping enzyme subunit beta;	36.36	124	S	NLLSNGSpPPMNDG	0.983137	1	0.70977	0.58308	1
Q08412	CUE5;	Ubiquitin-binding protein CUE5;	25.87	383	T	PPEPLDTpTPTKVN	0.889422	1	0.6043	0.58261	1
P18494	GLN3;	Nitrogen regulatory protein GLN3;	60.33	562	S	QNLLSNSpFQRQGM	0.903151	1	0.84963	0.58257	1
P38165	RTG3;	Retrograde regulation protein 3;	38.66	241	S	GSFLSSSpFRHGSI	0.998452	1	0.69755	0.58021	1
P53278	YG3A;	Uncharacterized protein YGR130C;	31.78	257	S	GKGTADSpAQINVA	0.826631	1	0.91235	0.57734	1
P39927	PTI1;	Protein PTI1;	31.41	268	S	APSLLSSpNNTSNS	0.696273	1	0.93846	0.57692	1
P32465	HXT1;	Low-affinity glucose transporter HXT1;	25.2	38	S	PEGKNESpFHDNLS	0.96468	1	0.79205	0.57606	1
A7A241;P43587	YPI1;YPI1	Type 1 phosphatases regulator YPI1;Type 1 phosphatases regulator YPI1;	52.84	131	S	KLEKKRSpYSPNAY	0.84769	1	0.7761	0.57558	1
P35845	OSH1;	Oxysterol-binding protein homolog 1;	27.22	678	S	TEANEESpDDANSM	0.999598	1	0.52675	0.57387	3
P35845	OSH1;	Oxysterol-binding protein homolog 1;	27.22	683	S	ESDDANSpMIKGSQ	0.999995	1	0.52675	0.57387	3
P17079	RL12;	60S ribosomal protein L12;	42.29	38	S	IGPLGLSpPKKVGE	1	1	0.62111	0.57044	1
P08153	SWI5;	Transcriptional factor SWI5;	38.4	492	S	VISETPSpPVLKSQ	0.999967	1	0.93662	0.5686	1
P37012	PGM2;	Phosphoglucomutase-2;	31.03	119	S	GIILTASpHNPGGP	0.830212	1	0.63565	0.56656	1
Q08581	SLK19;	Kinetochore protein SLK19;	36.43	6	T	_MNEVPTpTPVRLI	0.581514	1	0.72209	0.56587	1
P38968	SEC31;	Protein transport protein SEC31;	68.23	1053	S	RVATPLSpGGVPPA	0.803419	1	0.66948	0.56545	1
P09232	PRTB;	Cerevisin;	10.74	616	S	MDEFIGSpKTDLIF	0.671429	1	0.50468	0.56354	3
P38165	RTG3;	Retrograde regulation protein 3;	38.66	236	S	SSFRAGSpFLSSSF	0.935876	1	0.66651	0.5577	1
Q02725	VTC3;	Vacuolar transporter chaperone 3;	34.26	274	S	LSSDGNSpNQDVEI	0.974233	1	0.565	0.55758	1
P17121	SAC7;	GTPase-activating protein SAC7;	40.34	491	S	RRPHSKSpFGSTPV	0.999886	1	0.64548	0.55753	1
P34250	YKK5;	Uncharacterized protein YKL105C;	36.6	172	Y	EVEPPRYpSLSNRS	0.721009	1	0.85732	0.5561	1
P38931	SSN2;	Mediator of RNA polymerase II transcription subunit 13;	45.6	375	S	ISPKDFSpPNFTGI	0.999999	1	0.73582	0.55533	1
P24276	SSD1;	Protein SSD1;	55.03	286	S	QPQQQLSpPFRHRG	1	1	0.70783	0.55187	1
P39927	PTI1;	Protein PTI1;	31.41	271	T	LLSSNNTpSNSNTP	0.735327	1	1.0782	0.55108	1
P40454	PTPA1;	Serine/threonine-protein phosphatase 2A activator 1;	34.08	341	S	EQANAGSpPGREQT	1	1	0.73419	0.55085	1
P24276	SSD1;	Protein SSD1;	14.46	231	S	RATSNLSpPPSFKF	0.67446	1	0.76912	0.54778	1
P35180	TOM20;	Mitochondrial import receptor subunit TOM20;	24.41	87	S	PIPSDPSpEREATF	0.999983	1	0.057394	0.54467	3
P39705	NUP60;	Nucleoporin NUP60;	60.21	180	T	LKESGSTpPISISN	0.679337	1	0.75967	0.54456	1
P23642	VAN1;	Mannan polymerase I complex VAN1 subunit;	34.07	25	S	GLSLPISpRNGSSN	0.999921	1	0.4907	0.54444	3
Q06324	MMR1;	Mitochondrial MYO2 receptor-related protein 1;	65.57	37	S	FQNLLNSpPTKLKL	0.999172	1	0.85656	0.54182	1
P24276	SSD1;	Protein SSD1;	14.46	228	S	GHRRATSpNLSPPS	0.970785	1	0.62688	0.54121	1
P07248	ADR1;	Regulatory protein ADR1;	46.28	258	S	KDRVKFSpTPELVP	0.5	1	0.55724	0.54025	1
P38837	NSG1;	Protein NSG1;	66.99	39	S	NKLGSASpFTAINT	0.999941	1	0.54428	0.53576	1
P40091	PEA2;	Protein PEA2;	52.49	230	S	TSSPPISpPNAAAI	0.999981	1	0.80099	0.53573	1
P06842	STE2;	Pheromone alpha factor receptor;	49.98	331	S	SSFQTDSpINNDAK	0.999404	1	0.60503	0.53559	1
P38854	YHV9;	Uncharacterized protein YHR159W;	11.04	233	S	SKHLDPSpLNTPVK	0.5	1	0.64857	0.53452	1
P38854	YHV9;	Uncharacterized protein YHR159W;	11.04	236	T	LDPSLNTpPVKNRA	0.5	1	0.64857	0.53452	1
P40477	NU159;	Nucleoporin NUP159;	10.29	819	S	EEEAQKSpPIGKLT	0.999921	1	0.52511	0.53396	3
Q12043	TGL5;	Lipase 5;	26.85	645	S	TRQKANSpLSFAIG	0.886791	1	0.68921	0.53363	1
Q06146	YL257;	Uncharacterized protein YLR257W;	71.33	129	S	NSESFSSpPSLRAS	0.496755	1	0.9257	0.52782	1
Q06616	YP174;	Nuclear envelope protein YPR174C;	29.29	170	S	NPLVTSSpPIHMSP	0.97804	1	0.55333	0.52709	1
P06738	PHSG;	Glycogen phosphorylase;	29.65	19	S	ITEEPTSpPHQIPR	0.881909	1	0.58493	0.52563	1
Q08234	YO075;	Uncharacterized ABC transporter ATP-binding protein/permease YOL075C;	23.66	985	S	ANMDNESpLSPTPI	0.990142	1	0.52865	0.52404	1
P40510	SER33;	D-3-phosphoglycerate dehydrogenase 2;	39.21	31	T	AVSTSPTpQSFMNT	0.826907	1	0.60888	0.52098	1
P13186	KIN2;	Serine/threonine-protein kinase KIN2;	28.26	24	S	SKGGSLSpPTPEAF	0.872827	1	0.60861	0.52038	1
Q04007	YDR86;	Uncharacterized protein YDR186C;	28.23	568	S	PDSAGASpSPKRST	0.87397	1	0.59681	0.5198	1
P24276	SSD1;	Protein SSD1;	37.8	267	S	TRNNEYSpPGINSN	0.999978	1	0.65865	0.51831	1
Q06488	RSC2;	Chromatin structure-remodeling complex subunit RSC2;	53.58	682	S	PLSRVGSpPGAGGP	0.999997	1	0.67415	0.51782	1
Q03714	USA1;	U1 SNP1-associating protein 1;	39.12	376	S	PDTRSQSpPVSFAP	0.939753	1	0.64663	0.51756	1
P06842	STE2;	Pheromone alpha factor receptor;	26.74	411	T	EPVDMYTpPDTAAD	0.876352	1	0.50208	0.51595	3
P25364	HCM1;	Forkhead transcription factor HCM1;	48.83	496	S	TLETQISpPRKSSA	0.999974	1	0.73038	0.51361	1
P25364	HCM1;	Forkhead transcription factor HCM1;	48.83	493	T	PGGTLETpQISPRK	0.515596	1	0.73038	0.51361	1
P47082	AVT1;	Vacuolar amino acid transporter 1;	35.82	8	S	PEQEPLSpPNGRKR	1	1	0.58346	0.51323	1
P37012	PGM2;	Phosphoglucomutase-2;	31.03	117	T	TGGIILTpASHNPG	0.499998	1	0.75692	0.51241	1
P40510	SER33;	D-3-phosphoglycerate dehydrogenase 2;	39.21	29	S	PGAVSTSpPTQSFM	0.871396	1	0.59674	0.51177	1
Q00816	HEX2;	Protein HEX2;	14.41	773	S	TLSLGKSpGSTNSL	0.627575	1	0.42654	0.51014	3
Q00816	HEX2;	Protein HEX2;	14.41	775	S	SLGKSGSpTNSLYD	0.538057	1	0.42654	0.51014	3
P38968	SEC31;	Protein transport protein SEC31;	68.23	1050	T	PQQRVATpPLSGGV	0.999998	1	0.73106	0.50925	1
Q04279	YMX6;	Uncharacterized protein YMR086W;	25.67	656	S	RSIRSNSpPSPPEK	0.990138	1	0.62142	0.50915	1
P0C2J1	YP14B;	Transposon Ty1-PR3 Gag-Pol polyprotein;	27.85	1095	S	IIHRSPSpIDASPP	0.804338	1	0.55194	0.50793	1
P43598	YFI7;	Uncharacterized protein YFR017C;	26.66	164	S	ARVPHGSpPPQLGT	0.999983	1	0.54686	0.50693	1
P07248	ADR1;	Regulatory protein ADR1;	46.28	259	T	DRVKFSTpPELVPL	0.99974	1	0.56042	0.50685	1
P34216	YBE7;	Uncharacterized protein YBL047C;	31.33	1309	S	TKVATPSpIPQQPI	0.831858	1	0.702	0.50378	1
A6ZZR4;P35734	ASK1;ASK1	DASH complex subunit ASK1;DASH complex subunit ASK1;	38.27	155	S	ILKLPDSpSDEDTG	0.982482	1	0.84673	0.5035	1
P24276	SSD1;	Protein SSD1;	22.97	482	T	RRKRSSTpINNDSD	0.577354	1	1.3314	0.50108	1
P26781	RS11;	40S ribosomal protein S11;	8.07	72	T	IRGKILTpGTVVST	0.854623	1	1.1134	0.49958	1
P40510	SER33;	D-3-phosphoglycerate dehydrogenase 2;	39.21	22	S	AMNFSGSpPGAVST	0.831539	1	0.65133	0.49629	1
P06842	STE2;	Pheromone alpha factor receptor;	26.74	414	T	DMYTPDTpAADEEA	0.999977	1	0.64966	0.49408	1
P40510	SER33;	D-3-phosphoglycerate dehydrogenase 2;	39.21	20	S	QRAMNFSpGSPGAV	0.499908	1	0.58347	0.49406	1
P34216	YBE7;	Uncharacterized protein YBL047C;	31.33	1307	T	EPTKVATpPSIPQQ	0.997916	1	0.65559	0.4909	1
P27472	GYS2;	Glycogen [starch] synthase isoform 2;	44.62	655	S	PLSVPGSpPRDLRS	0.999997	1	0.62322	0.49002	1
P40212;Q12690	RL13B;RL13A	60S ribosomal protein L13-B;60S ribosomal protein L13-A;	16.57	152	T	PIAQPATpDVEARA	0.999921	1	0.54666	0.4892	1
Q08981	ACM1;	APC/C-CDH1 modulator 1;	26.96	161	T	SLPSFITpPPRNSK	0.991548	1	0.67496	0.48914	1
P22211	NPR1;	Nitrogen permease reactivator protein;	47.43	169	S	IPSLSSSpIPYSVP	0.899451	1	0.59447	0.48875	1
P38427	TSL1;	Trehalose synthase complex regulatory subunit TSL1;	42.18	56	S	NNISQESpLVAPAP	0.853522	1	0.88265	0.48304	1
Q12256	TPO4;	Polyamine transporter 4;	36.84	636	S	ISNSLYSpAIKDNE	0.999215	1	0.70349	0.48216	1
P47116	PTK2;	Serine/threonine-protein kinase PTK2/STK2;	11.99	726	S	LKSMLNSpTPTTPT	0.726347	1	0.554	0.4814	1
P47116	PTK2;	Serine/threonine-protein kinase PTK2/STK2;	11.99	730	T	LNSTPTTpPTHNGP	0.5077	1	0.554	0.4814	1
P39523	YM11;	Uncharacterized protein YMR124W;	25.43	262	S	LPPRAMSpLQSFPN	0.99762	1	0.79864	0.4782	1
P39015	STM1;	Suppressor protein STM1;	28.05	2	S	_____MSpNPFDLL	1	1	0.60864	0.47757	1
Q12697	ATC9;	Probable cation-transporting ATPase 2;	39.3	97	S	GRRLTESpEPLVLS	0.886774	1	0.63208	0.47732	1
P38853	KEL1;	Kelch repeat-containing protein 1;	40.07	503	S	PLASAPSpPAPKDF	0.975263	1	0.55212	0.47506	1
P06842	STE2;	Pheromone alpha factor receptor;	26.74	410	Y	VEPVDMYpTPDTAA	0.500443	1	0.84062	0.47314	1
P38634	SIC1;	Protein SIC1;	23.99	4	S	___MTPSpTPPRSR	0.561789	1	1.0241	0.47189	1
P32457	CDC3;	Cell division control protein 3;	40.53	501	S	LELSINSpASPNVN	0.609315	1	0.39913	0.47184	3
P40498	YIJ1;	Uncharacterized protein YIL091C;	42.1	155	S	DEKDIDSpEDEQDP	1	1	0.55185	0.465	1
Q12359	YD384;	Uncharacterized protein YDR384C;	51.54	6	S	_MTSSASpSPQDLE	0.99748	1	0.60796	0.46486	1
A6ZZV7;P28496	LAC1;LAC1	Sphingosine N-acyltransferase LAC1;Sphingosine N-acyltransferase LAC1;	31.66	9	S	TIKPSPSpNNNLKV	0.988493	1	0.52021	0.46437	1
P38928	AXL2;	Protein AXL2;	27.33	642	S	PVQPPESpPFFDPQ	1	1	0.7056	0.46399	1
P39109	YCFI;	Metal resistance protein YCF1;	14.56	877	S	ESSVRESpSIPVEG	0.5	1	0.68676	0.45519	1
P39109	YCFI;	Metal resistance protein YCF1;	14.56	878	S	SSVRESSpIPVEGE	0.5	1	0.68676	0.45519	1
P00950	PMG1;	Phosphoglycerate mutase 1;	38.6	116	S	FNTYRRSpFDVPPP	1	1	0.53633	0.45449	1
P40568	DSN1;	Kinetochore-associated protein DSN1;	9.37	10	S	EPTQTVSpGTPPML	0.56705	1	0.62969	0.45103	1
P40343	VPS27;	Vacuolar protein sorting-associated protein 27;	31.66	613	S	KEERPPSpPQEELL	1	1	0.82569	0.44735	1
P43598	YFI7;	Uncharacterized protein YFR017C;	38.48	16	T	QVSTSPTpFERSQD	0.892764	1	0.51844	0.43211	1
P38634	SIC1;	Protein SIC1;	23.99	5	T	__MTPSTpPPRSRG	0.901515	1	1.1016	0.42229	1
Q99383	HRP1;	Nuclear polyadenylated RNA-binding protein 4;	35.94	460	S	NTSNTDSpGSPPLN	0.818333	1	0.71034	0.4154	1
P40059	DOT6;	Disrupter of telomere silencing protein 6;	26.18	563	S	ISSKDVSpPDPIFS	0.99986	1	0.55572	0.41297	1
P00950	PMG1;	Phosphoglycerate mutase 1;	38.6	127	S	PPPIDASpSPFSQK	0.883974	1	0.50188	0.41183	1
P38968	SEC31;	Protein transport protein SEC31;	19.83	836	S	SQPSMASpPFVNKT	0.936868	1	0.74741	0.41182	1
P53322	TNA1;	High-affinity nicotinic acid transporter;	47.15	68	T	EIMATTTpDDDGIP	0.976377	1	0.6046	0.40492	1
P53898	NSG2;	Protein NSG2;	51.89	81	S	LPRNTVSpSNNLER	0.995365	1	0.81677	0.40299	1
P25364	HCM1;	Forkhead transcription factor HCM1;	48.83	486	T	PIRYITTpPGGTLE	0.99526	1	0.68831	0.39661	1
P40020	FIR1;	Factor interacting with REF2;	34.15	81	S	PDPNEISpQDSPLK	0.91467	1	0.58067	0.39523	1
P43564	YFD4;	Uncharacterized membrane protein YFL034W;	22.38	1037	S	KINPPQSpPNNFQL	0.995787	1	0.38298	0.39507	3
P08456	PSS;	CDP-diacylglycerol--serine O-phosphatidyltransferase;	27.44	46	S	TLSRRASpSIFSIN	0.739421	1	0.765	0.38712	1
Q12754	RRP12;	Ribosomal RNA-processing protein 12;	22.32	1156	S	PLSAVTSpGINAYL	0.693212	1	0.66842	0.37978	1
Q12754	RRP12;	Ribosomal RNA-processing protein 12;	22.32	1155	T	DPLSAVTpSGINAY	0.746914	1	0.66842	0.37978	1
P43598	YFI7;	Uncharacterized protein YFR017C;	26.66	170	T	SPPQLGTpRRKSSF	0.958975	1	0.54299	0.37844	1
P0C2J1	YP14B;	Transposon Ty1-PR3 Gag-Pol polyprotein;	27.85	1093	S	KRIIHRSpPSIDAS	0.856102	1	0.44342	0.37815	1
P40219	YM25;	Uncharacterized membrane protein YMR148W;	42.64	96	S	STLRPVSpNPTIPS	0.592465	1	0.56859	0.37752	1
P40219	YM25;	Uncharacterized membrane protein YMR148W;	42.64	102	S	SNPTIPSpPLRQTA	0.946541	1	0.57804	0.37154	1
P33338	SLA2;	Protein SLA2;	36.93	308	S	VAEPAISpPRPVSQ	0.994514	1	0.3986	0.36985	1
P33338	SLA2;	Protein SLA2;	36.93	294	T	ARTPARTpPTPTPP	0.850262	1	0.39899	0.35389	1
P23201	SPA2;	Protein SPA2;	18.73	599	S	TQKAINSpPIIRPS	0.999919	1	0.56978	0.35101	1
P32465	HXT1;	Low-affinity glucose transporter HXT1;	25.2	44	S	SFHDNLSpESQVQP	0.903689	1	0.55165	0.34915	1
P25358	ELO2;	Elongation of fatty acids protein 2;	21.62	336	S	KNVPTPSpPSPKPQ	0.508412	1	0.92662	0.3441	1
P39678	MBP1;	Transcription factor MBP1;	44.39	110	S	QTDGSASpPPPAPK	0.999634	1	0.66594	0.32491	1
P25358	ELO2;	Elongation of fatty acids protein 2;	21.62	334	T	DLKNVPTpPSPSPK	0.983176	1	0.87783	0.31642	1
P38427	TSL1;	Trehalose synthase complex regulatory subunit TSL1;	42.18	49	S	QQQRALSpNNISQE	0.826648	1	0.80382	0.31453	1
Q04201	YMK1;	Uncharacterized protein YML101C;	35.66	48	S	VATNDPSpPEPVPS	0.996314	1	0.66517	0.30841	1
P53252	PIL1;	Sphingolipid long chain base-responsive protein PIL1;	19.23	16	S	SRAPTASpQLQNPP	0.77046	1	0.81777	0.29985	1
P25358	ELO2;	Elongation of fatty acids protein 2;	21.62	338	S	VPTPSPSpPKPQHR	0.840436	1	0.8316	0.29097	1
Q12515	YD173;	Uncharacterized protein YDL173W;	13.13	131	S	PVTNTRSpRISATR	0.999322	1	0.83674	0.28012	1
Q12515	YD173;	Uncharacterized protein YDL173W;	13.13	134	S	NTRSRISpATRSHQ	0.916201	1	0.83674	0.28012	1
P37304	PAM1;	Protein PAM1;	31.28	767	S	INITQPSpPIQTNF	0.889996	1	0.69742	0.27215	1
P25339	PUF4;	Protein PUF4;	25.78	252	T	NTAKTRTpQSISFD	0.908791	1	0.55256	0.26058	1
Q00955	ACAC;	Acetyl-CoA carboxylase;	128.2	1162	S	VSVSDLSpYVANSQ	0.56701	1	0.38409	0.24097	1
Q00955	ACAC;	Acetyl-CoA carboxylase;	128.2	1157	S	GMNRAVSpVSDLSY	0.9999	1	0.37108	0.22439	1
Q00955	ACAC;	Acetyl-CoA carboxylase;	128.2	1159	S	NRAVSVSpDLSYVA	0.860963	1	0.30367	0.20396	1
P32605	RU1A;	U1 small nuclear ribonucleoprotein A;	30.47	120	S	NSLLGLSpIEMQKK	0.627223	1	0.30496	0.19919	1
P32561	RPD3;	Histone deacetylase RPD3;	22.7	287	S	LGCFNLSpMEGHAN	0.915693	1	1.9511	0.16899	1
P32561	RPD3;	Histone deacetylase RPD3;	22.7	300	S	CVNYVKSpFGIPMM	0.875854	1	1.9511	0.16899	1
P25297	PHO84;	Inorganic phosphate transporter PHO84;	16.41	321	S	ASTAVESpLDNHPP	1	1	0.2593	0.14792	1
P25297	PHO84;	Inorganic phosphate transporter PHO84;	16.41	317	T	GLERASTpAVESLD	0.600639	1	0.2593	0.14792	1
P36001	FOLC;	Probable folylpolyglutamate synthase;	25.38	149	S	SIIAGQSpRVCCAI	0.99964	1	0.032702	0.05982	3
P11632	NHP6A;	Non-histone chromosomal protein 6A;	10.95	41	S	NRDIVRSpENPDIT	1	1	0.24252	0.04882	1
P11632	NHP6A;	Non-histone chromosomal protein 6A;	10.95	47	T	SENPDITpFGQVGK	1	1	0.24252	0.04882	1
P48524	BUL1;	Ubiquitin ligase-binding protein BUL1;	20.5	29	S	SDFTANSpSTTMNV	0.570009	1	0.012385	0.021507	3
P48524	BUL1;	Ubiquitin ligase-binding protein BUL1;	20.5	26	T	PQRSDFTpANSSTT	0.758926	1	0.012385	0.021507	3
P30771	NAM7;	ATP-dependent helicase NAM7;	19.16	963	S	EQKHELSpKDFSNL	1	1	0.040807	0.0064974	1

## Sheet: Sheet 2
Table S2: Protein associations to clusters are listed in table below. Only proteins regulated at the level of phosphorylation are showed.
Uniprot	Gene name	Cluster no.
P38070	YBR028C	1
P36062	AVT3	1
Q06833	YPR091C	1
P48563	MON2	1
P38633	MED31	1
P39705	NUP60	1
P16387	PDA1	1
P06842	STE2	1
P23585	HXT2	1
P39969	BOI2	1
P53278	YGR130C	1
P07248	ADR1	1
P32660	DNF1	1
P21192	ACE2	1
P17891	CLC1	1
P32047	MLF3	1
Q08422	YOR052C	1
P19807	HNM1	1
P32909	SMY2	1
P39678	MBP1	1
P32457	CDC3	1
P43597	YFR016C	1
A7A261	LSB3	1
P38634	SIC1	1
P36148	GPT2	1
Q9P305	IGO2	1
P34216	EDE1	1
Q12176	MAK21	1
A6ZZR4	ASK1	1
Q03640	TCB3	1
P40956	GTS1	1
P48570	LYS20	1
P34223	UBX1	1
Q04279	YMR086W	1
P32449	ARO4	1
P27637	BUD14	1
P49686	NUP42	1
P41696	AZF1	1
P37370	VRP1	1
P40318	SSM4	1
P38968	SEC31	1
Q99385	VCX1	1
P50109	PSP2	1
P34072	MKS1	1
P32499	NUP2	1
Q05050	YMR031C	1
P39936	TIF4632	1
P06738	GPH1	1
P40477	NUP159	1
P13185	KIN1	1
Q12263	GIN4	1
P38903	RTS1	1
P23337	GSY1	1
Q08581	SLK19	1
P33322	CBF5	1
P39008	POP2	1
P19263	MED14	1
P08456	CHO1	1
P40074	AVT6	1
O13297	CET1	1
Q08412	CUE5	1
P18494	GLN3	1
P38165	RTG3	1
P39927	PTI1	1
P32465	HXT1	1
A7A241	YPI1	1
P17079	RPL12A	1
P08153	SWI5	1
P37012	PGM2	1
Q02725	VTC3	1
P17121	SAC7	1
P34250	YKL105C	1
P38931	SSN2	1
P24276	SSD1	1
P40454	RRD1	1
Q06324	MMR1	1
P38837	NSG1	1
P40091	PEA2	1
P38854	YHR159W	1
Q12043	TGL5	1
Q06146	YLR257W	1
Q06616	YPR174C	1
Q08234	YOL075C	1
P40510	SER33	1
P13186	KIN2	1
Q04007	YDR186C	1
Q06488	RSC2	1
Q03714	USA1	1
P25364	HCM1	1
P47082	AVT1	1
P0C2J1	TY1B-PR3	1
P43598	YFR017C	1
P26781	RPS11A	1
P27472	GSY2	1
P40212	RPL13B	1
Q08981	ACM1	1
P22211	NPR1	1
P38427	TSL1	1
Q12256	TPO4	1
P47116	PTK2	1
P39523	YMR124W	1
P39015	STM1	1
Q12697	YOR291W	1
P38853	KEL1	1
P40498	YIL091C	1
Q12359	ATO3	1
A6ZZV7	LAC1	1
P38928	AXL2	1
P39109	YCF1	1
P00950	GPM1	1
P40568	DSN1	1
P40343	VPS27	1
Q99383	HRP1	1
P40059	DOT6	1
P53322	TNA1	1
P53898	NSG2	1
P40020	FIR1	1
Q12754	RRP12	1
P40219	YMR148W	1
P33338	SLA2	1
P23201	SPA2	1
P25358	ELO2	1
Q04201	YMK1	1
P53252	PIL1	1
Q12515	PAR32	1
P37304	PAM1	1
P25339	PUF4	1
Q00955	FAS3	1
P32605	MUD1	1
P32561	RPD3	1
P25297	PHO84	1
P11632	NHP6A	1
P30771	NAM7	1
P47035	NET1	2
Q02100	SKO1	2
P39967	UBP9	2
Q12675	DNF2	2
Q04602	VBA4	2
P53743	ESF2	2
Q03640	TCB3	2
P40059	DOT6	2
Q07653	HBT1	2
P39935	TIF4631	2
P25376	AGP1	2
P16965	STF2	2
Q08412	CUE5	2
P30605	ITR1	2
A6ZP47	DED1	2
A6ZKU1	SLA1	2
P48415	SEC16	2
Q12427	STB3	2
P06842	STE2	2
P36169	SKG1	2
Q04964	SML1	2
Q06146	YLR257W	2
P34217	PIN4	2
Q05775	HCR1	2
P38250	IST2	2
P53897	IGO1	2
P32804	ZRT1	2
A6ZRZ6	END3	2
P25567	SRO9	2
P35197	GCS1	2
Q06451	TPO3	2
P32607	RTG1	2
P10080	SBP1	2
P38084	BAP2	2
P40485	SLM1	2
A6ZX59	ATG13	2
P40510	SER33	2
P25389	KCC4	2
P38845	YHR146W	2
Q99252	ECM3	2
P42846	KRI1	2
Q04500	UTP14	2
P20967	KGD1	2
P46949	FYV8	2
Q05812	MSC3	2
P21304	PWP1	2
P54000	SUB1	2
P39719	FLC2	2
P38993	FET3	2
P34223	UBX1	2
Q07950	YEH2	2
P21965	MCK1	2
P53168	DUO1	2
P22943	HSP12	2
Q08732	HRK1	2
P47116	PTK2	3
P43597	YFR016C	3
P53739	YNR047W	3
Q06169	PEX30	3
Q03516	RSN1	3
P13382	POL12	3
Q99385	VCX1	3
P04801	THS1	3
Q08732	HRK1	3
P0C2J1	TY1B-PR3	3
Q12427	STB3	3
P25364	HCM1	3
P38623	RCK2	3
P32660	DNF1	3
Q06685	VIP1	3
P32386	YBT1	3
P34216	EDE1	3
P48361	ASK10	3
Q12110	YLR049C	3
P25558	BUD3	3
Q12675	DNF2	3
Q06833	YPR091C	3
P04449	RPL24A	3
Q02866	MUK1	3
P53273	YGR125W	3
Q12256	TPO4	3
Q03497	STE20	3
P27636	CDC15	3
P53283	TPO2	3
Q12697	YOR291W	3
Q12117	MRH1	3
P32901	PTR2	3
P13185	KIN1	3
Q04336	YMR196W	3
P38826	ORC6	3
A6ZZY2	YKR018C	3
P53894	CBK1	3
P29465	CHS3	3
Q00955	FAS3	3
P47104	RAV1	3
P50942	INP52	3
P36024	SIS2	3
P34163	TGL1	3
Q02805	ROD1	3
Q00684	CDC14	3
P32769	HBS1	3
P34223	UBX1	3
P32336	NUD1	3
P47035	NET1	3
Q06407	RGA2	3
P06786	TOP2	3
P53735	ZRG17	3
P34217	PIN4	3
Q12445	POM34	3
P41832	BNI1	3
P31244	RAD16	3
P19524	MYO2	3
P33401	PGM1	3
P39705	NUP60	3
Q08412	CUE5	3
Q03088	SVL3	3
P46682	APL6	3
P54784	ORC1	3
P19807	HNM1	3
P38196	FUI1	3
P08456	CHO1	3
Q06336	GGA1	3
Q07657	SHS1	3
P23585	HXT2	3
P38080	AKL1	3
P11792	SCH9	3
P13574	STE12	3
P43598	YFR017C	3
P21268	FAR1	3
P06242	KIN28	3
P13259	PCT1	3
Q02725	VTC3	3
P35845	OSH1	3
P09232	PRB1	3
P35180	TOM20	3
P23642	VAN1	3
P40477	NUP159	3
P06842	STE2	3
Q00816	HEX2	3
P32457	CDC3	3
P43564	YFL034W	3
P36001	RMA1	3
P48524	BUL1	3
P33332	SEC3	4
P09959	SWI6	4
P16965	STF2	4
P34217	PIN4	4
P25371	ADP1	4
P36041	EAP1	4
Q05812	MSC3	4
A6ZUT6	PXR1	4
P40510	SER33	4
P33748	MSN2	4
P25567	SRO9	4
P54115	ALD6	4
Q12680	GLT1	4
Q12191	BUG1	4
Q08926	UIP4	4
P40079	LCP5	4
Q00055	GPD1	4
P38243	YBR071W	4
P40052	YER079W	4
Q03373	DIG2	4
P41338	ERG10	4
Q05942	RSA3	4
P34161	YOX1	4
A6ZXG9	DHH1	4
P53719	YNR014W	4
Q04779	RCO1	4
P39523	YMR124W	4
P36116	VPS51	4
P33313	CNS1	4
P39078	CCT4	4
P38845	YHR146W	4
Q08236	AVO1	4
P07245	ADE3	4
A6ZQ47	BUD4	4
Q12518	ENT1	4
P38990	PAK1	4
P38810	SFB3	4
P41895	TFG1	4
P25042	ROX1	4
Q08422	YOR052C	4
P40168	YNL195C	4
P40075	SCS2	4
Q9P305	IGO2	4
